# Supplementary material for: Integrating camera imagery, crowdsourcing, and deep learning to improve high-frequency automated monitoring of snow at continental-to-global scales
Source: PLoS One. 2018 Dec 27;13(12):e0209649. doi: 10.1371/journal.pone.0209649 (PMC6307743; doi:10.1371/journal.pone.0209649)
Supplement: S1 Table — ‘Number of Images’ refers to the number of images used at each site that did not have a crowd consensus label of ‘bad image’. (CSV) [file pone.0209649.s001.csv]

Site	Number of Images	Site Type	Trees Present	Latitude	Longitude	Site Description
acadia	2344	III	yes	44.376944	-68.260833	Acadia National Park, McFarland Hill, near Bar Harbor, Maine
aguatibianorth	779	III	yes	33.60222	-117.34368	Agua Tibia Wilderness, California
ahwahnee	1978	III	yes	37.7467	-119.5816	Ahwahnee Meadow, Yosemite National Park, California
alligatorriver	879	I	yes	35.7879	-75.9038	Alligator River National Wildlife Refuge, North Carolina
arbutuslake	1812	I	yes	43.98207	-74.23322	Arbutus Lake, Huntington Wildlife Forest, Newcomb, New York
armoklahoma	3277	II	no	36.6058	-97.4888	ARM Climate Research Facility, Billings, Oklahoma
asa	1074	II	yes	57.16449	14.7825	Asa, Sweden
ashburnham	1099	I	yes	42.6029	-71.926	Ashburnham State Forest / Overlook Middle School, Ashburnham, Massachusetts
barrocolorado	516	I	yes	9.154	-79.848	Smithsonian Tropical Research Institute, Barro Colorado Island, Panama
barrow	273	I	no	71.280075	-156.609149	Barrow Environmental Observatory, Barrow, Alaska
bartlett	2980	II	yes	44.0646	-71.2881	Bartlett Experimental Forest, Bartlett, New Hampshire
bartlettir	2198	I	yes	44.0646	-71.2881	Bartlett Experimental Forest, Bartlett, New Hampshire
bitterootvalley	4202	III	yes	46.507	-114.091	Bitterroot Valley, Stephensville, Montana
bostoncommon	1628	I	yes	42.355912	-71.064145	Boston Common, Boston, Massachusetts
bostonu	809	I	yes	42.35041	-71.10438	Boston University, Charles River Esplanade, Boston, Massachusetts
boundarywaters	1372	III	yes	47.946702	-91.495506	Boundary Waters Canoe Area Wilderness, Superior National Forest, Minnesota
bridger	645	III	yes	43.004	-109.756	Bridger Wilderness, Wyoming
bullshoals	225	I	yes	36.562833	-93.06663	Bull Shoals Field Station, Missouri State University, Drury-Mincy Conservation Area, Missouri
burnssagebrush	746	I	no	43.4712	-119.6909	Eastern Oregon Agricultural Research Center, Burns, Oregon
butte	2054	I	yes	45.95304	-112.47964	Continental Divide, Butte, Montana
canadaOA	1018	I	yes	53.62889	-106.19779	BERMS Old Aspen Site, Prince Albert National Park, Saskatchewan, Canada
canadaOBS	1183	I	yes	53.98717	-105.11779	BERMS Southern Old Black Spruce Site, Prince Albert National Park, Saskatchewan, Canada
caryinstitute	2321	I	yes	41.7839	-73.7341	Cary Institute of Ecosystem Studies, Millbrook, NY
cedarcreek	26	II	yes	45.4019	-93.2042	Cedar Creek Ecosystem Science Reserve (LTER), East Bethel, Minnesota
chibougamau	1081	I	yes	49.6924	-74.342	Eastern Old Black Spruce Site, Chibougamau, Quebec, Canada
coaloilpoint	1392	II	yes	34.413695	-119.880226	Coal Oil Point Natural Reserve, Santa Barbara, California
contactcreek	1115	II	no	58.2076	-155.9225	Contact Creek, Katmai National Park and Preserve, Alaska
coville	1144	II	no	58.8025	-155.5629	Lake Coville, Katmai National Park and Preserve, Alaska
coweeta	1304	II	yes	35.05959	-83.42798	Coweeta Hydrologic Laboratory, USDA Forest Service, Southern Research Station, Otto, North Carolina
dollysods	3058	III	yes	39.099529	-79.427041	Canaan Valley / Dolly Sods Wilderness, Monongahala National Forest, West Virginia
downerwoods	620	I	yes	43.07938	-87.88076	UW-Milwaukee Field Station, Downer Woods Natural Area, Milwaukee, Wisconsin
dukehw	548	I	yes	35.973583	-79.100371	Hardwood Stand, Duke Forest, North Carolina
exglsnotel	500	II	yes	60.1903	-149.6212	Exit Glacier, Kenai Fjords National Park, Alaska
freemangrass	691	I	no	29.93	-98.01	Grassland Site, Texas State University, Freeman Ranch, San Marcos, Texas
freemanwood	598	I	yes	29.94	-97.99	Woodland Site, Texas State University, Freeman Ranch, San Marcos, Texas
gcesapelo	417	I	no	31.444044	-81.283528	Georgia Coastal Ecosystems LTER, Sapelo Island, Georgia
grandcanyon	3885	III	no	36.06	-112.1175	Yavapai Museum, Grand Canyon National Park, Arizona
groundhog	1750	I	yes	48.2174	-82.1555	Groundhog River, Ontario, Canada
harvard	2397	I	yes	42.5378	-72.1715	EMS Tower, Harvard Forest, Petersham, Massachusetts
harvardbarn	1230	I	yes	42.53532	-72.1899	Barn Tower, Camera 1, Harvard Forest, Petersham, Massachusetts
harvardbarn2	1183	I	yes	42.53532	-72.1899	Barn Tower, Camera 2, Harvard Forest, Petersham, Massachusetts
harvardblo	2020	II	yes	42.5378	-72.1715	Below-canopy camera, EMS Tower, Harvard Forest, Petersham, Massachusetts
harvardhemlock	1597	I	yes	42.539	-72.18	Hemlock Tower, Harvard Forest, Petersham, Massachusetts
harvardlph	1509	I	yes	42.542	-72.185	LPH Tower, Harvard Forest, Petersham, Massachusetts
howland1	2672	I	yes	45.2041	-68.7403	Main Tower (Mature stand), Howland Forest, Howland, Maine
howland2	1450	I	yes	45.2128	-68.7418	North Tower (Regrowing clearcut, ca. 1990), Howland Forest, Howland, Maine
hubbardbrook	1940	I	yes	43.9438	-71.701	Hubbard Brook Experimental Forest, USDA Forest Service Headquarters, North Woodstock, New Hampshire
hubbardbrookml	231	II	yes	43.9496	-71.6984	Mirror Lake, Hubbard Brook Experimental Forest, Thornton, New Hampshire
hubbardbrooknfws	447	II	yes	42.958	-71.7762	North Facing Watersheds, Hubbard Brook Experimental Forest, Thornton, New Hampshire
hubbardbrooksfws	724	II	yes	43.9269	-71.7407	South�Facing Watersheds, Hubbard Brook Experimental Forest, Thornton, New Hampshire
ibp	546	I	no	32.589	-106.847	Jornada Experimental Range, New Mexico
imcrkfen	631	I	no	68.60583	-149.31101	Imnavait Creek Fen, AON IC_1523, Alaska
imcrkridge0	464	I	no	68.60681	-149.2958	Imnavait Creek Ridge, camera-0, AON IC_1991, Alaska
imcrkridge1	660	I	no	68.60681	-149.2958	Imnavait Creek Ridge, camera-1, AON IC_1991, Alaska
imcrktussock	650	I	no	68.60633	-149.30408	Imnavait Creek Tussock, AON IC_1993, Alaska
jasperridge	1025	I	no	37.402028	-122.22104	Jasper Ridge Biological Preserve, Woodside, California
jerbajada	246	I	no	32.57992	-106.633793	Jornada Experimental Range, New Mexico
jernort	280	I	no	32.619	-106.788	Jornada Experimental Range, New Mexico
jersand	292	I	no	32.515	-106.798	Jornada Experimental Range, New Mexico
joycekilmer	2186	III	yes	35.257	-83.795	Joyce Kilmer Slickrock Wilderness, North Carolina
kamuela	1546	I	no	20.015008	-155.661326	Parker Ranch, Waimea, Hawaii
kansas	746	I	no	39.0561	-95.1907	KU Field Station, University of Kansas, Kansas
kaweah	2180	III	yes	36.4435	-118.90925	Kaweah / Sequoia and Kings Canyon National Park, Three Rivers, California
kelloggcorn	208	I	no	42.437536	-85.322547	Kellogg Biological Station, Michigan
kendall	869	I	no	31.73652	-109.94185	Kendall Grassland, Arizona
konza	859	I	no	39.0824	-96.5603	Konza Prairie Biological Station, Kansas State University, Kansas
laurentides	951	I	yes	45.9881	-74.0055	Station de biologie des Laurentides, University�of Montreal, St-Hippolyte,�Quebec, Canada
lethbridge	1087	I	no	49.70919	-112.94025	Lethbridge Grassland Ecosystem Site, Lethbridge, Alberta
luckyhills	552	I	no	31.7438	-110.0522	Walnut Gulch, Lucky Hills Shrubland, Arizona
mammothcave	2495	III	yes	37.185833	-86.101944	Environmental Learning Center, Mammoth Cave National Park, Kentucky
marena	880	I	no	36.06434	-97.21271	Marena Site, Oklahoma Weather Labs, Oklahoma
mayberry	1261	II	no	38.049772	-121.765069	Mayberry Slough, Twitchell Island, Antioch, California
merbleue	752	I	no	45.4094	-75.5187	Mer Bleue Conservation Area, Ottawa, Ontario
missouriozarks	583	I	yes	38.7441	-92.2	University of Missouri, Ashland Wildlife Research Area, Missouri
morganmonroe	1991	I	yes	39.3231	-86.4131	Morgan Monroe State Forest, Indiana
mounthood	3085	III	yes	45.307	-121.706	Mount Hood National Forest, Oregon
mountranier	1301	III	yes	46.783333	-121.733333	Paradise, Mount Rainier National Park, Washington
nationalcapital	2743	III	yes	38.88818	-77.069496	Park Police Headquarters, National Capital Parks, Washington DC
ncssm	577	I	yes	36.018446	-78.92075	North Carolina School of Science and Mathematics, Durham, North Carolina
niwot2	1933	II	yes	40.032864	-105.54697	Niwot Ridge Mountain Research Station, Roosevelt National Forest, Colorado
northattleboroma	1004	I	yes	41.98369	-71.31056	North Attleboro High School, North Attleboro, Massachusetts
nwohiocrop	593	I	no	41.628419	-83.345328	Curtice Walter-Berger Cropland Flux Tower, Ohio
oakridge1	2231	II	yes	35.9311	-84.3323	Chestnut Ridge, Oak Ridge, Tennessee
oakridge2	2371	II	yes	35.9311	-84.3323	Chestnut Ridge, Oak Ridge, Tennessee
oregonMP	1174	I	yes	44.4523	-121.5574	Metolius intermediate pine/US-Me2, near Sisters, Oregon
oregonYP	1096	I	yes	44.32384	-121.605993	Metolius New Young Pine/US-Me6, near Sisters, Oregon
pasayten	2964	III	yes	48.393	-119.896	Pasayten Wilderness, Okanogan National Forest, Washington
pointreyes	888	III	no	37.996389	-123.021111	Point Reyes National Seashore, Point Reyes, California
portalsworth	62	II	yes	60.1958	-154.32	Port Alswoth, Lake Clark National Park and Preserve, Alaska
proctor	2156	I	yes	44.525	-72.866	University of Vermont, Proctor Maple Research Center, Underhill, Vermont
queens	1780	I	yes	44.565	-76.324	Queen's University Biological Station, Lake Opinicon, Ontario, Canada
quickbird	119	I	no	41.928871	-109.30387	USGS Quickbird Site 1, north of Rock Springs, Wyoming
readingma	1002	I	yes	42.5304	-71.1272	Austin Prep School, Reading, Massachusetts
russellsage	335	I	yes	32.456961	-91.974322	Russell Sage State Wildlife Management Area, near Monroe, Louisiana
sanford	369	I	yes	42.726777	-84.464482	Sanford Natural Area, Michigan State University, East Lansing, Michigan
sedgwick	1409	II	yes	34.69685	-120.0484	Sedgwick Ranch Reserve, Santa Ynez Valley, California
sevilletashrub	48	I	no	34.334944	-106.744167	Shrubland site, Sevilleta Long Term Ecological Research Site, New Mexico
shahariya	646	II	yes	31.599908	34.832867	Shahariya Forest, Israel
shalehillsczo	884	I	yes	40.65	-77.9	Susquehanna Shale Hills Critical Zone Observatory (CZO), Pennsylvania
shenandoah	1591	I	yes	38.6167	-78.35	Pinnacles Viewpoint, Shenandoah National Park, Virginia
silaslittle	726	II	yes	39.9137	-74.596	Silas Little Experimental Forest, New Lisbon, New Jersey
silverton	489	I	no	44.9986	-122.6948	Silverton CO2 Observation Site, Willamette Valley, Oregon
smokylook	4647	III	yes	35.632529	-83.943113	Look Rock, Great Smoky National Park, Tennessee
smokypurchase	3352	III	yes	35.586	-83.0733	Purchase Knob, Great Smoky National Park, Tennessee
snipelake	1162	II	no	60.6103	-154.3199	Snipe Lake, Lake Clark National Park and Preserve, Alaska
southerngreatplains	881	I	no	36.6058	-97.4888	ARM Southern Great Plains Central Facility, Billings, Oklahoma, USA
springfieldma	972	I	yes	42.135162	-72.585972	Academy Hill School, Springfield, Massachusetts
teddy	1915	III	no	46.894722	-103.3775	Painted Canyon Visitor Center, Teddy Roosevelt National Park, North Dakota
thompsonfarm2N	1864	II	yes	43.1086	-70.9505	University of New Hampshire, Thompson Farm Observatory, Durham, New Hampshire
tonzi	1099	I	yes	38.430917	-120.965886	Tonzi Ranch, Amador County, California
torgnon-ld	681	II	yes	45.82376	7.56089	Torgnon Research Site (Forest site), Torgnon, Italy
torgnon-nd	1386	II	yes	45.8444	7.5781	Torgnon Research Site (Alpine grassland site), Torgnon, Italy
turkeypointdbf	1033	I	yes	42.635312	-80.557562	Mature Deciduous Site, Turkey Point Carbon Cycle Research Project, Ontario, Canada
turkeypointenf02	945	II	yes	42.660936	-80.559519	2002 White Pine, Turkey Point Carbon Cycle Research Project, Ontario, Canada
turkeypointenf39	1063	I	yes	42.709778	-80.3574	1939 White Pine, Turkey Point Carbon Cycle Research Project, Ontario Canada
turkeypointenf74	1005	I	yes	42.706811	-80.348314	1974 White Pine, Turkey Point Carbon Cycle Research Project, Ontario Canada
twitchell	159	II	no	38.108728	-121.653017	Twitchell Island, Antioch, California
uiefmaize	2232	II	no	40.062822	-88.196128	Maize/Soybean agroecosystem at the University of Illinois Energy Farm, Urbana, IL USA
uiefmiscanthus	2214	II	no	40.06281	-88.198428	Miscanthus agroecosystem at the University of Illinois Energy Farm, Urbana, IL USA
uiefprairie	2211	II	no	40.063694	-88.197289	Restored prairie at the University of Illinois Energy Farm, Urbana, IL USA
uiefswitchgrass	2196	II	no	40.063694	-88.197289	Switchgrass agroecosystem at the University of Illinois Energy Farm, Urbana, IL USA
umichbiological	2075	I	yes	45.55984	-84.71382	University of Michigan Biological Station, near Pellston, Michigan
umichbiological2	2079	I	yes	45.5625	-84.6976	FASET Tower, University of Michigan Biological Station, near Pellston, Michigan
usgsreston	780	II	yes	38.9471	-77.3676	USGS Headquarters, Reston, Virginia
usmpj	428	I	yes	34.43845	-106.254361	Heritage Land Conservancy, Pinyon-Juniper Site near Mountainair, NM
uwmfieldsta	648	I	yes	43.38709	-88.0229	University of Wisconsin-Milwaukee Field Station, Saukville, Wisconsin
vaira	1649	I	yes	38.413281	-120.950636	Vaira Ranch, Amador County, California
vancouverisland	1111	I	yes	49.53635	-124.901667	University of British Columbia Douglas-fir Chronosequence (HDF88), Vancouver Island, British Columbia
willowcreek	943	I	yes	45.805986	-90.07912	Willow Creek, Chequamegon-Nicolet National Forest, Wisconsin
windriver	1650	I	yes	45.821283	-121.952083	Thornton T. Munger Research Natural Area, Wind River Experimental Forest, Washington
windriverunderstory	257	II	yes	45.821283	-121.952083	Understory Camera, Thornton T. Munger Research Natural Area, Wind River Experimental Forest, Washington
woodshole	1250	II	yes	41.5495	-70.6432	Woods Hole Research Center, Falmouth, Massachusetts
worcester	583	I	yes	42.2697	-71.8428	Worcester State University, Worcester, Massachusetts
