# Supplementary material for: Integrating camera imagery, crowdsourcing, and deep learning to improve high-frequency automated monitoring of snow at continental-to-global scales
Source: PLoS One. 2018 Dec 27;13(12):e0209649. doi: 10.1371/journal.pone.0209649 (PMC6307743; doi:10.1371/journal.pone.0209649)
Supplement: S2 Table — See [33] to access the original images. (CSV) [file pone.0209649.s002.csv]

image	crowd_consensus	crowd_consensus_text
acadia_2007_03_15_140000.jpg	0	no_snow
acadia_2007_03_16_140000.jpg	3	snow_on_ground
acadia_2007_03_18_140000.jpg	3	snow_on_ground
acadia_2007_03_19_140000.jpg	3	snow_on_ground
acadia_2007_03_20_140000.jpg	0	no_snow
acadia_2007_03_21_140000.jpg	0	no_snow
acadia_2007_03_22_140000.jpg	0	no_snow
acadia_2007_03_23_140000.jpg	0	no_snow
acadia_2007_03_24_140000.jpg	0	no_snow
acadia_2007_03_25_140000.jpg	0	no_snow
acadia_2007_03_26_140000.jpg	0	no_snow
acadia_2007_03_27_140000.jpg	0	no_snow
acadia_2007_03_28_140000.jpg	0	no_snow
acadia_2007_03_29_140000.jpg	0	no_snow
acadia_2007_03_30_140000.jpg	0	no_snow
acadia_2007_03_31_140000.jpg	0	no_snow
acadia_2007_04_01_140000.jpg	0	no_snow
acadia_2007_04_02_140000.jpg	0	no_snow
acadia_2007_04_03_140000.jpg	2	snow_on_trees
acadia_2007_04_04_140000.jpg	2	snow_on_trees
acadia_2007_04_06_070000.jpg	2	snow_on_trees
acadia_2007_04_07_140000.jpg	2	snow_on_trees
acadia_2007_04_08_140000.jpg	3	snow_on_ground
acadia_2007_04_09_140000.jpg	3	snow_on_ground
acadia_2007_04_10_140000.jpg	3	snow_on_ground
acadia_2007_04_11_140000.jpg	3	snow_on_ground
acadia_2007_04_12_140000.jpg	3	snow_on_ground
acadia_2007_04_13_140000.jpg	3	snow_on_ground
acadia_2007_04_14_140000.jpg	3	snow_on_ground
acadia_2007_04_15_140000.jpg	3	snow_on_ground
acadia_2007_04_18_140000.jpg	3	snow_on_ground
acadia_2007_04_19_140000.jpg	0	no_snow
acadia_2007_04_20_140000.jpg	0	no_snow
acadia_2007_04_21_140000.jpg	0	no_snow
acadia_2007_04_22_140000.jpg	0	no_snow
acadia_2007_04_23_140000.jpg	0	no_snow
acadia_2007_04_24_140000.jpg	0	no_snow
acadia_2007_04_25_140000.jpg	0	no_snow
acadia_2007_04_26_140000.jpg	0	no_snow
acadia_2007_04_27_140000.jpg	0	no_snow
acadia_2007_04_28_140000.jpg	0	no_snow
acadia_2007_04_30_140000.jpg	0	no_snow
acadia_2007_05_01_140000.jpg	0	no_snow
acadia_2007_05_02_140000.jpg	0	no_snow
acadia_2007_05_03_140000.jpg	0	no_snow
acadia_2007_05_04_140000.jpg	0	no_snow
acadia_2007_05_05_140000.jpg	0	no_snow
acadia_2007_05_06_140000.jpg	0	no_snow
acadia_2007_05_07_140000.jpg	0	no_snow
acadia_2007_05_08_140000.jpg	0	no_snow
acadia_2007_05_09_140000.jpg	0	no_snow
acadia_2007_05_10_140000.jpg	0	no_snow
acadia_2007_05_12_140000.jpg	0	no_snow
acadia_2007_05_13_140000.jpg	0	no_snow
acadia_2007_05_14_140000.jpg	0	no_snow
acadia_2007_05_15_140000.jpg	0	no_snow
acadia_2007_05_17_140000.jpg	0	no_snow
acadia_2007_05_19_140000.jpg	0	no_snow
acadia_2007_05_20_140000.jpg	0	no_snow
acadia_2007_05_21_140000.jpg	0	no_snow
acadia_2007_05_22_140000.jpg	0	no_snow
acadia_2007_05_23_140000.jpg	0	no_snow
acadia_2007_05_24_140000.jpg	0	no_snow
acadia_2007_05_25_140000.jpg	0	no_snow
acadia_2007_05_26_140000.jpg	0	no_snow
acadia_2007_05_27_140000.jpg	0	no_snow
acadia_2007_05_28_140000.jpg	0	no_snow
acadia_2007_05_29_140000.jpg	0	no_snow
acadia_2007_05_30_140000.jpg	0	no_snow
acadia_2007_05_31_140000.jpg	0	no_snow
acadia_2007_06_01_140000.jpg	0	no_snow
acadia_2007_06_02_140000.jpg	0	no_snow
acadia_2007_06_03_140000.jpg	0	no_snow
acadia_2007_06_05_140000.jpg	0	no_snow
acadia_2007_06_06_140000.jpg	0	no_snow
acadia_2007_06_07_140000.jpg	0	no_snow
acadia_2007_06_08_140000.jpg	0	no_snow
acadia_2007_06_12_140000.jpg	0	no_snow
acadia_2007_06_13_140000.jpg	0	no_snow
acadia_2007_06_14_140000.jpg	0	no_snow
acadia_2007_06_15_140000.jpg	0	no_snow
acadia_2007_06_16_070000.jpg	0	no_snow
acadia_2007_06_17_140000.jpg	0	no_snow
acadia_2007_06_18_140000.jpg	0	no_snow
acadia_2007_06_19_140000.jpg	0	no_snow
acadia_2007_06_20_140000.jpg	0	no_snow
acadia_2007_06_21_140000.jpg	0	no_snow
acadia_2007_06_22_070000.jpg	0	no_snow
acadia_2007_06_23_140000.jpg	0	no_snow
acadia_2007_06_24_140000.jpg	0	no_snow
acadia_2007_06_25_140000.jpg	0	no_snow
acadia_2007_06_26_140000.jpg	0	no_snow
acadia_2007_06_27_140000.jpg	0	no_snow
acadia_2007_06_28_140000.jpg	0	no_snow
acadia_2007_06_29_140000.jpg	0	no_snow
acadia_2007_06_30_140000.jpg	0	no_snow
acadia_2007_07_01_140000.jpg	0	no_snow
acadia_2007_07_02_140000.jpg	0	no_snow
acadia_2007_07_03_140000.jpg	0	no_snow
acadia_2007_07_04_140000.jpg	0	no_snow
acadia_2007_07_05_140000.jpg	0	no_snow
acadia_2007_07_07_140000.jpg	0	no_snow
acadia_2007_07_08_140000.jpg	0	no_snow
acadia_2007_07_09_140000.jpg	0	no_snow
acadia_2007_07_10_140000.jpg	0	no_snow
acadia_2007_07_12_140000.jpg	0	no_snow
acadia_2007_07_13_140000.jpg	0	no_snow
acadia_2007_07_14_140000.jpg	0	no_snow
acadia_2007_07_15_070000.jpg	0	no_snow
acadia_2007_07_16_140000.jpg	0	no_snow
acadia_2007_07_17_140000.jpg	0	no_snow
acadia_2007_07_18_140000.jpg	0	no_snow
acadia_2007_07_19_140000.jpg	0	no_snow
acadia_2007_07_20_140000.jpg	0	no_snow
acadia_2007_07_21_140000.jpg	0	no_snow
acadia_2007_07_22_070000.jpg	0	no_snow
acadia_2007_07_23_140000.jpg	0	no_snow
acadia_2007_07_24_140000.jpg	0	no_snow
acadia_2007_07_26_140000.jpg	0	no_snow
acadia_2007_07_27_140000.jpg	0	no_snow
acadia_2007_07_28_140000.jpg	0	no_snow
acadia_2007_07_29_140000.jpg	0	no_snow
acadia_2007_07_30_140000.jpg	0	no_snow
acadia_2007_07_31_140000.jpg	0	no_snow
acadia_2007_08_01_140000.jpg	0	no_snow
acadia_2007_08_02_140000.jpg	0	no_snow
acadia_2007_08_03_140000.jpg	0	no_snow
acadia_2007_08_04_140000.jpg	0	no_snow
acadia_2007_08_05_140000.jpg	0	no_snow
acadia_2007_08_06_140000.jpg	0	no_snow
acadia_2007_08_07_140000.jpg	0	no_snow
acadia_2007_08_08_140000.jpg	0	no_snow
acadia_2007_08_09_140000.jpg	0	no_snow
acadia_2007_08_10_140000.jpg	0	no_snow
acadia_2007_08_11_140000.jpg	0	no_snow
acadia_2007_08_12_140000.jpg	0	no_snow
acadia_2007_08_13_140000.jpg	0	no_snow
acadia_2007_08_14_140000.jpg	0	no_snow
acadia_2007_08_15_070000.jpg	0	no_snow
acadia_2007_08_16_140000.jpg	0	no_snow
acadia_2007_08_17_140000.jpg	0	no_snow
acadia_2007_08_18_140000.jpg	0	no_snow
acadia_2007_08_19_140000.jpg	0	no_snow
acadia_2007_08_20_140000.jpg	0	no_snow
acadia_2007_08_21_140000.jpg	0	no_snow
acadia_2007_08_22_140000.jpg	0	no_snow
acadia_2007_08_23_140000.jpg	0	no_snow
acadia_2007_08_26_140000.jpg	0	no_snow
acadia_2007_08_27_140000.jpg	0	no_snow
acadia_2007_08_29_140000.jpg	0	no_snow
acadia_2007_08_30_140000.jpg	0	no_snow
acadia_2007_08_31_140000.jpg	0	no_snow
acadia_2007_09_05_140000.jpg	0	no_snow
acadia_2007_09_07_070000.jpg	0	no_snow
acadia_2007_09_08_140000.jpg	0	no_snow
acadia_2007_09_09_140000.jpg	0	no_snow
acadia_2007_09_12_070000.jpg	0	no_snow
acadia_2007_09_14_140000.jpg	0	no_snow
acadia_2007_09_15_140000.jpg	0	no_snow
acadia_2007_09_16_140000.jpg	0	no_snow
acadia_2007_09_17_140000.jpg	0	no_snow
acadia_2007_09_19_140000.jpg	0	no_snow
acadia_2007_09_20_140000.jpg	0	no_snow
acadia_2007_09_21_140000.jpg	0	no_snow
acadia_2007_09_22_140000.jpg	0	no_snow
acadia_2007_09_23_140000.jpg	0	no_snow
acadia_2007_09_24_140000.jpg	0	no_snow
acadia_2007_09_25_140000.jpg	0	no_snow
acadia_2007_09_26_140000.jpg	0	no_snow
acadia_2007_09_27_140000.jpg	0	no_snow
acadia_2007_09_28_140000.jpg	0	no_snow
acadia_2007_09_29_140000.jpg	0	no_snow
acadia_2007_09_30_140000.jpg	0	no_snow
acadia_2007_10_01_140000.jpg	0	no_snow
acadia_2007_10_02_140000.jpg	0	no_snow
acadia_2007_10_03_140000.jpg	0	no_snow
acadia_2007_10_04_140000.jpg	0	no_snow
acadia_2007_10_05_140000.jpg	0	no_snow
acadia_2007_10_06_140000.jpg	0	no_snow
acadia_2007_10_07_140000.jpg	0	no_snow
acadia_2007_10_08_140000.jpg	0	no_snow
acadia_2007_10_09_140000.jpg	0	no_snow
acadia_2007_10_10_140000.jpg	0	no_snow
acadia_2007_10_11_070000.jpg	0	no_snow
acadia_2007_10_12_140000.jpg	0	no_snow
acadia_2007_10_13_140000.jpg	0	no_snow
acadia_2007_10_16_140000.jpg	0	no_snow
acadia_2007_10_17_140000.jpg	0	no_snow
acadia_2007_10_18_140000.jpg	0	no_snow
acadia_2007_10_20_140000.jpg	0	no_snow
acadia_2007_10_21_140000.jpg	0	no_snow
acadia_2007_10_22_140000.jpg	0	no_snow
acadia_2007_10_23_140000.jpg	0	no_snow
acadia_2007_10_24_140000.jpg	0	no_snow
acadia_2007_10_25_140000.jpg	0	no_snow
acadia_2007_10_26_140000.jpg	0	no_snow
acadia_2007_10_28_140000.jpg	0	no_snow
acadia_2007_10_29_140000.jpg	0	no_snow
acadia_2007_10_30_140000.jpg	0	no_snow
acadia_2007_10_31_140000.jpg	0	no_snow
acadia_2007_11_01_140000.jpg	0	no_snow
acadia_2007_11_02_140000.jpg	0	no_snow
acadia_2007_11_03_140000.jpg	0	no_snow
acadia_2007_11_04_150000.jpg	0	no_snow
acadia_2007_11_05_150000.jpg	0	no_snow
acadia_2007_11_06_150000.jpg	0	no_snow
acadia_2007_11_07_150000.jpg	0	no_snow
acadia_2007_11_08_150000.jpg	0	no_snow
acadia_2007_11_09_150000.jpg	0	no_snow
acadia_2007_11_13_150000.jpg	0	no_snow
acadia_2007_11_14_150000.jpg	0	no_snow
acadia_2007_11_15_150000.jpg	0	no_snow
acadia_2007_11_16_150000.jpg	0	no_snow
acadia_2007_11_17_150000.jpg	0	no_snow
acadia_2007_11_18_150000.jpg	0	no_snow
acadia_2007_11_19_150000.jpg	0	no_snow
acadia_2007_11_20_150000.jpg	0	no_snow
acadia_2007_11_21_150000.jpg	0	no_snow
acadia_2007_11_24_150000.jpg	0	no_snow
acadia_2007_11_25_150000.jpg	0	no_snow
acadia_2007_11_26_150000.jpg	0	no_snow
acadia_2007_11_27_150000.jpg	0	no_snow
acadia_2007_11_28_150000.jpg	0	no_snow
acadia_2007_11_29_150000.jpg	0	no_snow
acadia_2007_11_30_150000.jpg	0	no_snow
acadia_2007_12_01_150000.jpg	0	no_snow
acadia_2007_12_02_150000.jpg	0	no_snow
acadia_2007_12_04_150000.jpg	2	snow_on_trees
acadia_2007_12_05_150000.jpg	2	snow_on_trees
acadia_2007_12_06_150000.jpg	2	snow_on_trees
acadia_2007_12_07_150000.jpg	2	snow_on_trees
acadia_2007_12_09_150000.jpg	3	snow_on_ground
acadia_2007_12_10_150000.jpg	2	snow_on_trees
acadia_2007_12_11_150000.jpg	2	snow_on_trees
acadia_2007_12_12_150000.jpg	0	no_snow
acadia_2007_12_13_150000.jpg	3	snow_on_ground
acadia_2007_12_14_150000.jpg	2	snow_on_trees
acadia_2007_12_15_150000.jpg	2	snow_on_trees
acadia_2007_12_17_150000.jpg	3	snow_on_ground
acadia_2007_12_18_150000.jpg	3	snow_on_ground
acadia_2007_12_19_150000.jpg	3	snow_on_ground
acadia_2007_12_21_150000.jpg	3	snow_on_ground
acadia_2007_12_22_150000.jpg	2	snow_on_trees
acadia_2007_12_23_150000.jpg	3	snow_on_ground
acadia_2007_12_24_150000.jpg	3	snow_on_ground
acadia_2007_12_25_150000.jpg	3	snow_on_ground
acadia_2007_12_26_150000.jpg	3	snow_on_ground
acadia_2007_12_27_150000.jpg	0	no_snow
acadia_2007_12_28_150000.jpg	2	snow_on_trees
acadia_2007_12_30_150000.jpg	3	snow_on_ground
acadia_2007_12_31_150000.jpg	2	snow_on_trees
acadia_2008_01_01_150000.jpg	2	snow_on_trees
acadia_2008_01_02_150000.jpg	2	snow_on_trees
acadia_2008_01_03_150000.jpg	2	snow_on_trees
acadia_2008_01_04_150000.jpg	2	snow_on_trees
acadia_2008_01_05_150000.jpg	2	snow_on_trees
acadia_2008_01_06_150000.jpg	2	snow_on_trees
acadia_2008_01_07_150000.jpg	3	snow_on_ground
acadia_2008_01_08_150000.jpg	3	snow_on_ground
acadia_2008_01_10_150000.jpg	0	no_snow
acadia_2008_01_11_150000.jpg	0	no_snow
acadia_2008_01_12_150000.jpg	0	no_snow
acadia_2008_01_13_150000.jpg	0	no_snow
acadia_2008_01_15_150000.jpg	2	snow_on_trees
acadia_2008_01_16_150000.jpg	2	snow_on_trees
acadia_2008_01_17_150000.jpg	2	snow_on_trees
acadia_2008_01_18_150000.jpg	3	snow_on_ground
acadia_2008_01_19_150000.jpg	3	snow_on_ground
acadia_2008_01_22_150000.jpg	3	snow_on_ground
acadia_2008_01_23_150000.jpg	3	snow_on_ground
acadia_2008_01_24_080000.jpg	3	snow_on_ground
acadia_2008_01_29_080000.jpg	3	snow_on_ground
acadia_2008_01_30_150000.jpg	3	snow_on_ground
acadia_2008_02_04_150000.jpg	0	no_snow
acadia_2008_02_05_150000.jpg	3	snow_on_ground
acadia_2008_02_06_080000.jpg	2	snow_on_trees
acadia_2008_02_07_150000.jpg	2	snow_on_trees
acadia_2008_02_08_150000.jpg	2	snow_on_trees
acadia_2008_02_09_150000.jpg	2	snow_on_trees
acadia_2008_02_11_150000.jpg	2	snow_on_trees
acadia_2008_02_12_150000.jpg	2	snow_on_trees
acadia_2008_02_13_150000.jpg	3	snow_on_ground
acadia_2008_02_14_150000.jpg	3	snow_on_ground
acadia_2008_02_15_150000.jpg	3	snow_on_ground
acadia_2008_02_16_150000.jpg	3	snow_on_ground
acadia_2008_02_17_150000.jpg	3	snow_on_ground
acadia_2008_02_18_150000.jpg	0	no_snow
acadia_2008_02_19_150000.jpg	0	no_snow
acadia_2008_02_20_150000.jpg	0	no_snow
acadia_2008_02_21_150000.jpg	0	no_snow
acadia_2008_02_23_150000.jpg	2	snow_on_trees
acadia_2008_02_24_150000.jpg	3	snow_on_ground
acadia_2008_02_25_150000.jpg	3	snow_on_ground
acadia_2008_02_26_150000.jpg	3	snow_on_ground
acadia_2008_02_27_150000.jpg	2	snow_on_trees
acadia_2008_02_28_080000.jpg	2	snow_on_trees
acadia_2008_02_29_150000.jpg	2	snow_on_trees
acadia_2008_03_03_150000.jpg	2	snow_on_trees
acadia_2008_03_04_150000.jpg	2	snow_on_trees
acadia_2008_03_06_150000.jpg	3	snow_on_ground
acadia_2008_03_07_150000.jpg	3	snow_on_ground
acadia_2008_03_09_140000.jpg	3	snow_on_ground
acadia_2008_03_10_140000.jpg	3	snow_on_ground
acadia_2008_03_11_140000.jpg	3	snow_on_ground
acadia_2008_03_12_140000.jpg	2	snow_on_trees
acadia_2008_03_13_140000.jpg	2	snow_on_trees
acadia_2008_03_14_070000.jpg	3	snow_on_ground
acadia_2008_03_17_140000.jpg	3	snow_on_ground
acadia_2008_03_18_140000.jpg	3	snow_on_ground
acadia_2008_03_19_140000.jpg	3	snow_on_ground
acadia_2008_03_20_140000.jpg	0	no_snow
acadia_2008_03_21_140000.jpg	3	snow_on_ground
acadia_2008_03_22_140000.jpg	0	no_snow
acadia_2008_03_23_140000.jpg	0	no_snow
acadia_2008_03_24_140000.jpg	0	no_snow
acadia_2008_03_25_140000.jpg	0	no_snow
acadia_2008_03_26_140000.jpg	0	no_snow
acadia_2008_03_27_140000.jpg	0	no_snow
acadia_2008_03_28_140000.jpg	2	snow_on_trees
acadia_2008_03_29_140000.jpg	2	snow_on_trees
acadia_2008_03_30_140000.jpg	3	snow_on_ground
acadia_2008_03_31_140000.jpg	0	no_snow
acadia_2008_04_01_140000.jpg	0	no_snow
acadia_2008_04_02_140000.jpg	0	no_snow
acadia_2008_04_03_140000.jpg	0	no_snow
acadia_2008_04_04_140000.jpg	0	no_snow
acadia_2008_04_05_140000.jpg	0	no_snow
acadia_2008_04_06_070000.jpg	0	no_snow
acadia_2008_04_08_140000.jpg	0	no_snow
acadia_2008_04_09_140000.jpg	0	no_snow
acadia_2008_04_10_140000.jpg	0	no_snow
acadia_2008_04_11_140000.jpg	0	no_snow
acadia_2008_04_13_140000.jpg	0	no_snow
acadia_2008_04_14_140000.jpg	0	no_snow
acadia_2008_04_15_140000.jpg	0	no_snow
acadia_2008_04_16_140000.jpg	0	no_snow
acadia_2008_04_17_140000.jpg	0	no_snow
acadia_2008_04_18_140000.jpg	0	no_snow
acadia_2008_04_19_140000.jpg	0	no_snow
acadia_2008_04_20_140000.jpg	0	no_snow
acadia_2008_04_21_140000.jpg	0	no_snow
acadia_2008_04_22_140000.jpg	0	no_snow
acadia_2008_04_23_140000.jpg	0	no_snow
acadia_2008_04_24_140000.jpg	0	no_snow
acadia_2008_04_25_140000.jpg	0	no_snow
acadia_2008_04_26_140000.jpg	0	no_snow
acadia_2008_04_27_140000.jpg	0	no_snow
acadia_2008_04_28_070000.jpg	0	no_snow
acadia_2008_04_29_140000.jpg	0	no_snow
acadia_2008_04_30_140000.jpg	0	no_snow
acadia_2008_05_01_140000.jpg	0	no_snow
acadia_2008_05_02_140000.jpg	0	no_snow
acadia_2008_05_03_140000.jpg	0	no_snow
acadia_2008_05_04_140000.jpg	0	no_snow
acadia_2008_05_05_140000.jpg	0	no_snow
acadia_2008_05_06_140000.jpg	0	no_snow
acadia_2008_05_07_070000.jpg	0	no_snow
acadia_2008_08_28_134200.jpg	0	no_snow
acadia_2008_08_29_121800.jpg	0	no_snow
acadia_2008_08_30_121000.jpg	0	no_snow
acadia_2008_08_31_110400.jpg	0	no_snow
acadia_2008_09_01_121900.jpg	0	no_snow
acadia_2008_09_02_122000.jpg	0	no_snow
acadia_2008_09_03_122100.jpg	0	no_snow
acadia_2008_09_04_121500.jpg	0	no_snow
acadia_2008_09_05_121000.jpg	0	no_snow
acadia_2008_09_06_120400.jpg	0	no_snow
acadia_2008_09_07_120600.jpg	0	no_snow
acadia_2008_09_08_121600.jpg	0	no_snow
acadia_2008_09_09_090400.jpg	0	no_snow
acadia_2008_09_11_120600.jpg	0	no_snow
acadia_2008_09_12_120600.jpg	0	no_snow
acadia_2008_09_13_120400.jpg	0	no_snow
acadia_2008_09_15_121100.jpg	0	no_snow
acadia_2008_09_16_120900.jpg	0	no_snow
acadia_2008_09_19_120700.jpg	0	no_snow
acadia_2008_09_20_120900.jpg	0	no_snow
acadia_2008_09_21_120900.jpg	0	no_snow
acadia_2008_09_22_121300.jpg	0	no_snow
acadia_2008_09_23_122500.jpg	0	no_snow
acadia_2008_09_24_121900.jpg	0	no_snow
acadia_2008_09_25_112700.jpg	0	no_snow
acadia_2008_09_26_122100.jpg	0	no_snow
acadia_2008_09_29_120300.jpg	0	no_snow
acadia_2008_09_30_121300.jpg	0	no_snow
acadia_2008_10_01_120500.jpg	0	no_snow
acadia_2008_10_02_121900.jpg	0	no_snow
acadia_2008_10_03_122600.jpg	0	no_snow
acadia_2008_10_04_121300.jpg	0	no_snow
acadia_2008_10_05_121700.jpg	0	no_snow
acadia_2008_10_06_114800.jpg	0	no_snow
acadia_2008_10_07_114400.jpg	0	no_snow
acadia_2008_10_08_122000.jpg	0	no_snow
acadia_2008_10_10_144400.jpg	0	no_snow
acadia_2008_10_11_121700.jpg	0	no_snow
acadia_2008_10_12_121800.jpg	0	no_snow
acadia_2008_10_13_104900.jpg	0	no_snow
acadia_2008_10_14_122600.jpg	0	no_snow
acadia_2008_10_15_121300.jpg	0	no_snow
acadia_2008_10_16_121400.jpg	0	no_snow
acadia_2008_10_17_121800.jpg	0	no_snow
acadia_2008_10_18_120800.jpg	0	no_snow
acadia_2008_10_19_121000.jpg	0	no_snow
acadia_2008_10_20_122100.jpg	0	no_snow
acadia_2008_10_21_114500.jpg	0	no_snow
acadia_2008_10_22_132900.jpg	0	no_snow
acadia_2008_10_23_113000.jpg	0	no_snow
acadia_2008_10_24_121500.jpg	0	no_snow
acadia_2008_10_25_120700.jpg	0	no_snow
acadia_2008_10_26_121200.jpg	0	no_snow
acadia_2008_10_28_114200.jpg	0	no_snow
acadia_2008_10_29_113200.jpg	0	no_snow
acadia_2008_10_30_122700.jpg	0	no_snow
acadia_2008_10_31_121600.jpg	0	no_snow
acadia_2008_11_01_120700.jpg	0	no_snow
acadia_2008_11_03_111300.jpg	0	no_snow
acadia_2008_11_04_121200.jpg	0	no_snow
acadia_2008_11_05_114600.jpg	0	no_snow
acadia_2008_11_08_120700.jpg	0	no_snow
acadia_2008_11_10_122800.jpg	0	no_snow
acadia_2008_11_11_121400.jpg	0	no_snow
acadia_2008_11_12_121600.jpg	0	no_snow
acadia_2008_11_13_121700.jpg	0	no_snow
acadia_2008_11_16_090800.jpg	0	no_snow
acadia_2008_11_17_160400.jpg	0	no_snow
acadia_2008_11_18_113800.jpg	0	no_snow
acadia_2008_11_19_121200.jpg	0	no_snow
acadia_2008_11_20_122000.jpg	0	no_snow
acadia_2008_11_21_121300.jpg	0	no_snow
acadia_2008_11_22_111200.jpg	2	snow_on_trees
acadia_2008_11_23_120700.jpg	0	no_snow
acadia_2008_11_24_112000.jpg	0	no_snow
acadia_2008_11_25_121900.jpg	0	no_snow
acadia_2008_11_26_121200.jpg	0	no_snow
acadia_2008_11_27_120700.jpg	0	no_snow
acadia_2008_11_28_121000.jpg	0	no_snow
acadia_2008_12_02_122400.jpg	0	no_snow
acadia_2008_12_03_121300.jpg	0	no_snow
acadia_2008_12_04_121700.jpg	0	no_snow
acadia_2008_12_05_121300.jpg	0	no_snow
acadia_2008_12_06_121300.jpg	2	snow_on_trees
acadia_2008_12_07_121000.jpg	0	no_snow
acadia_2008_12_08_122100.jpg	2	snow_on_trees
acadia_2008_12_09_121500.jpg	2	snow_on_trees
acadia_2008_12_10_122100.jpg	0	no_snow
acadia_2008_12_11_122900.jpg	0	no_snow
acadia_2008_12_12_161700.jpg	0	no_snow
acadia_2008_12_13_121200.jpg	0	no_snow
acadia_2008_12_14_121000.jpg	0	no_snow
acadia_2008_12_15_122300.jpg	0	no_snow
acadia_2008_12_16_113400.jpg	0	no_snow
acadia_2008_12_17_122500.jpg	2	snow_on_trees
acadia_2008_12_18_122800.jpg	2	snow_on_trees
acadia_2008_12_19_122800.jpg	2	snow_on_trees
acadia_2008_12_20_121400.jpg	2	snow_on_trees
acadia_2008_12_21_121400.jpg	2	snow_on_trees
acadia_2008_12_22_122600.jpg	2	snow_on_trees
acadia_2008_12_23_121700.jpg	2	snow_on_trees
acadia_2008_12_24_121500.jpg	3	snow_on_ground
acadia_2008_12_25_120500.jpg	3	snow_on_ground
acadia_2008_12_26_120600.jpg	3	snow_on_ground
acadia_2008_12_29_150800.jpg	0	no_snow
acadia_2008_12_30_121300.jpg	0	no_snow
acadia_2008_12_31_121500.jpg	0	no_snow
acadia_2009_01_01_121000.jpg	0	no_snow
acadia_2009_01_02_120500.jpg	0	no_snow
acadia_2009_01_03_120800.jpg	0	no_snow
acadia_2009_01_04_120700.jpg	0	no_snow
acadia_2009_01_05_121200.jpg	0	no_snow
acadia_2009_01_06_121600.jpg	0	no_snow
acadia_2009_01_07_121900.jpg	3	snow_on_ground
acadia_2009_01_08_111300.jpg	3	snow_on_ground
acadia_2009_01_09_121400.jpg	3	snow_on_ground
acadia_2009_01_12_122100.jpg	2	snow_on_trees
acadia_2009_01_13_122300.jpg	3	snow_on_ground
acadia_2009_01_14_122800.jpg	2	snow_on_trees
acadia_2009_01_15_122900.jpg	3	snow_on_ground
acadia_2009_01_16_102500.jpg	3	snow_on_ground
acadia_2009_01_17_121400.jpg	3	snow_on_ground
acadia_2009_01_19_121700.jpg	2	snow_on_trees
acadia_2009_01_20_110300.jpg	2	snow_on_trees
acadia_2009_01_22_113600.jpg	2	snow_on_trees
acadia_2009_01_23_122800.jpg	2	snow_on_trees
acadia_2009_01_24_121200.jpg	3	snow_on_ground
acadia_2009_01_25_121600.jpg	3	snow_on_ground
acadia_2009_01_26_122700.jpg	3	snow_on_ground
acadia_2009_01_27_121900.jpg	3	snow_on_ground
acadia_2009_01_28_122700.jpg	2	snow_on_trees
acadia_2009_01_29_121700.jpg	3	snow_on_ground
acadia_2009_01_30_121800.jpg	2	snow_on_trees
acadia_2009_01_31_121300.jpg	3	snow_on_ground
acadia_2009_02_01_121000.jpg	3	snow_on_ground
acadia_2009_02_02_121200.jpg	3	snow_on_ground
acadia_2009_02_03_110500.jpg	3	snow_on_ground
acadia_2009_02_04_120500.jpg	2	snow_on_trees
acadia_2009_02_05_120600.jpg	2	snow_on_trees
acadia_2009_02_06_130500.jpg	3	snow_on_ground
acadia_2009_02_07_120500.jpg	3	snow_on_ground
acadia_2009_02_08_120500.jpg	3	snow_on_ground
acadia_2009_02_09_120500.jpg	3	snow_on_ground
acadia_2009_02_10_120500.jpg	3	snow_on_ground
acadia_2009_02_11_110500.jpg	3	snow_on_ground
acadia_2009_02_13_120600.jpg	3	snow_on_ground
acadia_2009_02_14_120400.jpg	3	snow_on_ground
acadia_2009_02_15_120500.jpg	3	snow_on_ground
acadia_2009_02_16_120500.jpg	3	snow_on_ground
acadia_2009_02_17_120500.jpg	3	snow_on_ground
acadia_2009_02_18_120400.jpg	3	snow_on_ground
acadia_2009_02_20_120500.jpg	2	snow_on_trees
acadia_2009_02_21_120400.jpg	2	snow_on_trees
acadia_2009_02_22_120500.jpg	2	snow_on_trees
acadia_2009_02_24_120500.jpg	2	snow_on_trees
acadia_2009_02_25_120500.jpg	2	snow_on_trees
acadia_2009_02_26_120500.jpg	2	snow_on_trees
acadia_2009_02_27_120500.jpg	3	snow_on_ground
acadia_2009_02_28_120400.jpg	3	snow_on_ground
acadia_2009_03_03_090400.jpg	3	snow_on_ground
acadia_2009_03_04_150400.jpg	3	snow_on_ground
acadia_2009_03_05_110500.jpg	3	snow_on_ground
acadia_2009_03_06_120500.jpg	3	snow_on_ground
acadia_2009_03_07_120400.jpg	3	snow_on_ground
acadia_2009_03_08_120400.jpg	3	snow_on_ground
acadia_2009_03_09_120600.jpg	3	snow_on_ground
acadia_2009_03_10_120500.jpg	3	snow_on_ground
acadia_2009_03_11_120600.jpg	3	snow_on_ground
acadia_2009_03_12_121300.jpg	3	snow_on_ground
acadia_2009_03_13_120500.jpg	3	snow_on_ground
acadia_2009_03_14_120400.jpg	3	snow_on_ground
acadia_2009_03_15_120500.jpg	3	snow_on_ground
acadia_2009_03_16_120500.jpg	3	snow_on_ground
acadia_2009_03_17_120500.jpg	3	snow_on_ground
acadia_2009_03_18_120500.jpg	3	snow_on_ground
acadia_2009_03_19_120400.jpg	3	snow_on_ground
acadia_2009_03_20_120500.jpg	3	snow_on_ground
acadia_2009_03_21_120500.jpg	3	snow_on_ground
acadia_2009_03_22_120500.jpg	3	snow_on_ground
acadia_2009_03_23_120400.jpg	3	snow_on_ground
acadia_2009_03_24_120600.jpg	3	snow_on_ground
acadia_2009_03_25_120600.jpg	3	snow_on_ground
acadia_2009_03_26_090400.jpg	0	no_snow
acadia_2009_03_27_120500.jpg	0	no_snow
acadia_2009_03_28_120500.jpg	3	snow_on_ground
acadia_2009_03_29_120500.jpg	0	no_snow
acadia_2009_03_31_120500.jpg	3	snow_on_ground
acadia_2009_04_01_150500.jpg	0	no_snow
acadia_2009_04_02_120500.jpg	0	no_snow
acadia_2009_04_04_120500.jpg	0	no_snow
acadia_2009_04_05_110400.jpg	0	no_snow
acadia_2009_04_06_120500.jpg	0	no_snow
acadia_2009_04_07_120700.jpg	0	no_snow
acadia_2009_04_08_120500.jpg	0	no_snow
acadia_2009_04_09_120500.jpg	0	no_snow
acadia_2009_04_11_120400.jpg	0	no_snow
acadia_2009_04_12_120400.jpg	0	no_snow
acadia_2009_04_13_120500.jpg	0	no_snow
acadia_2009_04_14_120500.jpg	0	no_snow
acadia_2009_04_15_120500.jpg	0	no_snow
acadia_2009_04_16_120500.jpg	0	no_snow
acadia_2009_04_17_120500.jpg	0	no_snow
acadia_2009_04_18_120400.jpg	0	no_snow
acadia_2009_04_19_120400.jpg	0	no_snow
acadia_2009_04_20_120500.jpg	0	no_snow
acadia_2009_04_23_110500.jpg	0	no_snow
acadia_2009_04_24_120500.jpg	0	no_snow
acadia_2009_04_25_120500.jpg	0	no_snow
acadia_2009_04_26_120400.jpg	0	no_snow
acadia_2009_04_27_110400.jpg	0	no_snow
acadia_2009_04_28_120500.jpg	0	no_snow
acadia_2009_04_29_120500.jpg	0	no_snow
acadia_2009_04_30_120500.jpg	0	no_snow
acadia_2009_05_02_120500.jpg	0	no_snow
acadia_2009_05_03_120500.jpg	0	no_snow
acadia_2009_05_04_120500.jpg	0	no_snow
acadia_2009_05_05_120500.jpg	0	no_snow
acadia_2009_05_06_120500.jpg	0	no_snow
acadia_2009_05_07_120500.jpg	0	no_snow
acadia_2009_05_08_120500.jpg	0	no_snow
acadia_2009_05_09_120500.jpg	0	no_snow
acadia_2009_05_10_080400.jpg	0	no_snow
acadia_2009_05_11_170500.jpg	0	no_snow
acadia_2009_05_12_120500.jpg	0	no_snow
acadia_2009_05_13_120500.jpg	0	no_snow
acadia_2009_05_14_120500.jpg	0	no_snow
acadia_2009_05_15_120500.jpg	0	no_snow
acadia_2009_05_16_120500.jpg	0	no_snow
acadia_2009_05_17_120400.jpg	0	no_snow
acadia_2009_05_18_120600.jpg	0	no_snow
acadia_2009_05_19_120500.jpg	0	no_snow
acadia_2009_05_20_120500.jpg	0	no_snow
acadia_2009_05_21_120500.jpg	0	no_snow
acadia_2009_05_22_120500.jpg	0	no_snow
acadia_2009_05_23_120600.jpg	0	no_snow
acadia_2009_05_24_120500.jpg	0	no_snow
acadia_2009_05_25_120400.jpg	0	no_snow
acadia_2009_05_26_120700.jpg	0	no_snow
acadia_2009_05_27_120800.jpg	0	no_snow
acadia_2009_05_30_120600.jpg	0	no_snow
acadia_2009_06_01_160000.jpg	0	no_snow
acadia_2009_06_02_120000.jpg	0	no_snow
acadia_2009_06_03_120000.jpg	0	no_snow
acadia_2009_06_04_120000.jpg	0	no_snow
acadia_2009_06_05_120000.jpg	0	no_snow
acadia_2009_06_08_150000.jpg	0	no_snow
acadia_2009_06_09_120000.jpg	0	no_snow
acadia_2009_06_11_120000.jpg	0	no_snow
acadia_2009_06_12_120000.jpg	0	no_snow
acadia_2009_06_13_120000.jpg	0	no_snow
acadia_2009_06_14_120000.jpg	0	no_snow
acadia_2009_06_15_120000.jpg	0	no_snow
acadia_2009_06_16_120000.jpg	0	no_snow
acadia_2009_06_17_120000.jpg	0	no_snow
acadia_2009_06_19_140000.jpg	0	no_snow
acadia_2009_06_21_120000.jpg	0	no_snow
acadia_2009_06_22_140000.jpg	0	no_snow
acadia_2009_06_23_120000.jpg	0	no_snow
acadia_2009_06_25_120000.jpg	0	no_snow
acadia_2009_06_26_120000.jpg	0	no_snow
acadia_2009_06_27_120000.jpg	0	no_snow
acadia_2009_06_29_140000.jpg	0	no_snow
acadia_2009_06_30_120000.jpg	0	no_snow
acadia_2009_07_01_120000.jpg	0	no_snow
acadia_2009_07_02_120000.jpg	0	no_snow
acadia_2009_07_03_120000.jpg	0	no_snow
acadia_2009_07_04_120000.jpg	0	no_snow
acadia_2009_07_05_120000.jpg	0	no_snow
acadia_2009_07_06_120000.jpg	0	no_snow
acadia_2009_07_09_120000.jpg	0	no_snow
acadia_2009_07_10_120000.jpg	0	no_snow
acadia_2009_07_11_120000.jpg	0	no_snow
acadia_2009_07_13_120000.jpg	0	no_snow
acadia_2009_07_14_120000.jpg	0	no_snow
acadia_2009_07_15_100000.jpg	0	no_snow
acadia_2009_07_16_120000.jpg	0	no_snow
acadia_2009_07_17_120000.jpg	0	no_snow
acadia_2009_07_19_120000.jpg	0	no_snow
acadia_2009_07_20_100000.jpg	0	no_snow
acadia_2009_07_21_120000.jpg	0	no_snow
acadia_2009_07_22_130000.jpg	0	no_snow
acadia_2009_07_23_120000.jpg	0	no_snow
acadia_2009_07_25_110000.jpg	0	no_snow
acadia_2009_07_26_120000.jpg	0	no_snow
acadia_2009_07_27_120000.jpg	0	no_snow
acadia_2009_07_28_120000.jpg	0	no_snow
acadia_2009_07_29_120000.jpg	0	no_snow
acadia_2009_07_30_120000.jpg	0	no_snow
acadia_2009_07_31_120000.jpg	0	no_snow
acadia_2009_08_01_120000.jpg	0	no_snow
acadia_2009_08_02_120000.jpg	0	no_snow
acadia_2009_08_03_120000.jpg	0	no_snow
acadia_2009_08_04_120000.jpg	0	no_snow
acadia_2009_08_05_130000.jpg	0	no_snow
acadia_2009_08_06_120000.jpg	0	no_snow
acadia_2009_08_07_080000.jpg	0	no_snow
acadia_2009_08_10_110000.jpg	0	no_snow
acadia_2009_08_11_120000.jpg	0	no_snow
acadia_2009_08_12_120000.jpg	0	no_snow
acadia_2009_08_13_120000.jpg	0	no_snow
acadia_2009_08_14_120000.jpg	0	no_snow
acadia_2009_08_15_120000.jpg	0	no_snow
acadia_2009_08_16_120000.jpg	0	no_snow
acadia_2009_08_17_130000.jpg	0	no_snow
acadia_2009_08_18_120000.jpg	0	no_snow
acadia_2009_08_19_120000.jpg	0	no_snow
acadia_2009_08_20_120200.jpg	0	no_snow
acadia_2009_08_21_120200.jpg	0	no_snow
acadia_2009_08_22_120100.jpg	0	no_snow
acadia_2009_08_23_120100.jpg	0	no_snow
acadia_2009_08_24_120200.jpg	0	no_snow
acadia_2009_08_25_120200.jpg	0	no_snow
acadia_2009_08_26_120200.jpg	0	no_snow
acadia_2009_08_27_120300.jpg	0	no_snow
acadia_2009_08_28_120300.jpg	0	no_snow
acadia_2009_08_29_120100.jpg	0	no_snow
acadia_2009_08_30_120100.jpg	0	no_snow
acadia_2009_08_31_120200.jpg	0	no_snow
acadia_2009_09_01_120200.jpg	0	no_snow
acadia_2009_09_02_120200.jpg	0	no_snow
acadia_2009_09_03_120200.jpg	0	no_snow
acadia_2009_09_04_090200.jpg	0	no_snow
acadia_2009_09_05_120200.jpg	0	no_snow
acadia_2009_09_06_120200.jpg	0	no_snow
acadia_2009_09_07_120100.jpg	0	no_snow
acadia_2009_09_08_120200.jpg	0	no_snow
acadia_2009_09_09_110200.jpg	0	no_snow
acadia_2009_09_10_120200.jpg	0	no_snow
acadia_2009_09_11_120200.jpg	0	no_snow
acadia_2009_09_12_120100.jpg	0	no_snow
acadia_2009_09_13_120100.jpg	0	no_snow
acadia_2009_09_14_120200.jpg	0	no_snow
acadia_2009_09_15_120200.jpg	0	no_snow
acadia_2009_09_16_120200.jpg	0	no_snow
acadia_2009_09_17_120200.jpg	0	no_snow
acadia_2009_09_18_120200.jpg	0	no_snow
acadia_2009_09_19_120200.jpg	0	no_snow
acadia_2009_09_20_120100.jpg	0	no_snow
acadia_2009_09_21_120400.jpg	0	no_snow
acadia_2009_09_22_120400.jpg	0	no_snow
acadia_2009_09_23_120400.jpg	0	no_snow
acadia_2009_09_24_120300.jpg	0	no_snow
acadia_2009_09_25_120200.jpg	0	no_snow
acadia_2009_09_26_120400.jpg	0	no_snow
acadia_2009_09_27_120200.jpg	0	no_snow
acadia_2009_09_28_120200.jpg	0	no_snow
acadia_2009_09_29_120300.jpg	0	no_snow
acadia_2009_09_30_120300.jpg	0	no_snow
acadia_2009_10_01_070100.jpg	0	no_snow
acadia_2009_10_02_120200.jpg	0	no_snow
acadia_2009_10_03_120200.jpg	0	no_snow
acadia_2009_10_07_120300.jpg	0	no_snow
acadia_2009_10_08_120400.jpg	0	no_snow
acadia_2009_10_09_120500.jpg	0	no_snow
acadia_2009_10_10_120200.jpg	0	no_snow
acadia_2009_10_11_120300.jpg	0	no_snow
acadia_2009_10_13_120700.jpg	0	no_snow
acadia_2009_10_14_130700.jpg	0	no_snow
acadia_2009_10_15_120400.jpg	0	no_snow
acadia_2009_10_16_120300.jpg	0	no_snow
acadia_2009_10_17_120300.jpg	0	no_snow
acadia_2009_10_18_120300.jpg	0	no_snow
acadia_2009_10_19_120400.jpg	0	no_snow
acadia_2009_10_20_120800.jpg	0	no_snow
acadia_2009_10_21_120400.jpg	0	no_snow
acadia_2009_10_23_120400.jpg	0	no_snow
acadia_2009_10_24_120200.jpg	0	no_snow
acadia_2009_10_25_120200.jpg	0	no_snow
acadia_2009_10_26_120200.jpg	0	no_snow
acadia_2009_10_27_120100.jpg	0	no_snow
acadia_2009_10_28_120200.jpg	0	no_snow
acadia_2009_10_29_120400.jpg	0	no_snow
acadia_2009_10_30_120200.jpg	0	no_snow
acadia_2009_10_31_120100.jpg	0	no_snow
acadia_2009_11_01_120200.jpg	0	no_snow
acadia_2009_11_02_120200.jpg	0	no_snow
acadia_2009_11_03_120200.jpg	0	no_snow
acadia_2009_11_04_140200.jpg	0	no_snow
acadia_2009_11_05_120200.jpg	0	no_snow
acadia_2009_11_06_120300.jpg	0	no_snow
acadia_2009_11_07_120100.jpg	0	no_snow
acadia_2009_11_08_120200.jpg	0	no_snow
acadia_2009_11_09_080000.jpg	0	no_snow
acadia_2009_11_10_120200.jpg	0	no_snow
acadia_2009_11_11_120200.jpg	0	no_snow
acadia_2009_11_12_120400.jpg	0	no_snow
acadia_2009_11_13_120300.jpg	0	no_snow
acadia_2009_11_14_120200.jpg	0	no_snow
acadia_2009_11_16_120300.jpg	0	no_snow
acadia_2009_11_17_110200.jpg	0	no_snow
acadia_2009_11_18_100200.jpg	0	no_snow
acadia_2009_11_19_120300.jpg	0	no_snow
acadia_2009_11_20_120200.jpg	0	no_snow
acadia_2009_11_21_120200.jpg	0	no_snow
acadia_2009_11_22_120100.jpg	0	no_snow
acadia_2009_11_23_120200.jpg	0	no_snow
acadia_2009_11_24_120300.jpg	0	no_snow
acadia_2009_12_01_120200.jpg	0	no_snow
acadia_2009_12_02_120300.jpg	0	no_snow
acadia_2009_12_04_120200.jpg	0	no_snow
acadia_2009_12_05_120300.jpg	0	no_snow
acadia_2009_12_06_100200.jpg	2	snow_on_trees
acadia_2009_12_08_110300.jpg	2	snow_on_trees
acadia_2009_12_09_110500.jpg	0	no_snow
acadia_2009_12_10_110400.jpg	2	snow_on_trees
acadia_2009_12_11_120400.jpg	3	snow_on_ground
acadia_2009_12_12_100200.jpg	3	snow_on_ground
acadia_2009_12_14_130100.jpg	3	snow_on_ground
acadia_2009_12_16_120100.jpg	0	no_snow
acadia_2009_12_17_120400.jpg	3	snow_on_ground
acadia_2009_12_18_120600.jpg	3	snow_on_ground
acadia_2009_12_19_120200.jpg	3	snow_on_ground
acadia_2009_12_20_120100.jpg	2	snow_on_trees
acadia_2009_12_21_120200.jpg	2	snow_on_trees
acadia_2009_12_22_120200.jpg	3	snow_on_ground
acadia_2009_12_23_120400.jpg	3	snow_on_ground
acadia_2009_12_24_120100.jpg	3	snow_on_ground
acadia_2009_12_25_120200.jpg	3	snow_on_ground
acadia_2009_12_26_120200.jpg	2	snow_on_trees
acadia_2009_12_27_120100.jpg	3	snow_on_ground
acadia_2009_12_28_120300.jpg	0	no_snow
acadia_2009_12_29_120200.jpg	2	snow_on_trees
acadia_2009_12_30_130300.jpg	2	snow_on_trees
acadia_2009_12_31_120600.jpg	2	snow_on_trees
acadia_2010_01_05_130400.jpg	2	snow_on_trees
acadia_2010_01_06_120300.jpg	3	snow_on_ground
acadia_2010_01_07_120500.jpg	2	snow_on_trees
acadia_2010_01_08_120600.jpg	3	snow_on_ground
acadia_2010_01_09_120600.jpg	3	snow_on_ground
acadia_2010_01_10_120100.jpg	3	snow_on_ground
acadia_2010_01_11_120500.jpg	3	snow_on_ground
acadia_2010_01_12_120500.jpg	3	snow_on_ground
acadia_2010_01_13_120600.jpg	3	snow_on_ground
acadia_2010_01_14_120400.jpg	3	snow_on_ground
acadia_2010_01_15_120300.jpg	3	snow_on_ground
acadia_2010_01_16_120200.jpg	3	snow_on_ground
acadia_2010_01_17_120100.jpg	3	snow_on_ground
acadia_2010_01_19_120500.jpg	2	snow_on_trees
acadia_2010_01_21_120300.jpg	2	snow_on_trees
acadia_2010_01_22_120400.jpg	2	snow_on_trees
acadia_2010_01_23_120700.jpg	2	snow_on_trees
acadia_2010_01_25_120400.jpg	3	snow_on_ground
acadia_2010_01_26_120300.jpg	3	snow_on_ground
acadia_2010_01_27_120400.jpg	3	snow_on_ground
acadia_2010_01_28_100100.jpg	3	snow_on_ground
acadia_2010_01_29_120900.jpg	2	snow_on_trees
acadia_2010_01_30_120300.jpg	2	snow_on_trees
acadia_2010_01_31_120500.jpg	2	snow_on_trees
acadia_2010_02_01_120300.jpg	3	snow_on_ground
acadia_2010_02_02_120500.jpg	3	snow_on_ground
acadia_2010_02_03_120300.jpg	2	snow_on_trees
acadia_2010_02_04_120300.jpg	2	snow_on_trees
acadia_2010_02_05_120300.jpg	2	snow_on_trees
acadia_2010_02_06_120200.jpg	3	snow_on_ground
acadia_2010_02_08_120300.jpg	3	snow_on_ground
acadia_2010_02_09_120500.jpg	3	snow_on_ground
acadia_2010_02_10_120300.jpg	3	snow_on_ground
acadia_2010_02_11_120700.jpg	3	snow_on_ground
acadia_2010_02_12_130300.jpg	3	snow_on_ground
acadia_2010_02_13_120300.jpg	3	snow_on_ground
acadia_2010_02_14_120300.jpg	3	snow_on_ground
acadia_2010_02_16_121000.jpg	3	snow_on_ground
acadia_2010_02_17_121100.jpg	3	snow_on_ground
acadia_2010_02_18_120800.jpg	3	snow_on_ground
acadia_2010_02_19_120400.jpg	3	snow_on_ground
acadia_2010_02_20_120200.jpg	3	snow_on_ground
acadia_2010_02_21_120200.jpg	2	snow_on_trees
acadia_2010_02_22_120200.jpg	3	snow_on_ground
acadia_2010_02_23_120400.jpg	3	snow_on_ground
acadia_2010_02_24_120400.jpg	3	snow_on_ground
acadia_2010_02_25_120200.jpg	0	no_snow
acadia_2010_02_28_120100.jpg	2	snow_on_trees
acadia_2010_03_01_120500.jpg	3	snow_on_ground
acadia_2010_03_02_120700.jpg	3	snow_on_ground
acadia_2010_03_03_120400.jpg	3	snow_on_ground
acadia_2010_03_04_120500.jpg	0	no_snow
acadia_2010_03_05_120400.jpg	0	no_snow
acadia_2010_03_06_120100.jpg	0	no_snow
acadia_2010_03_07_120100.jpg	0	no_snow
acadia_2010_03_08_120600.jpg	0	no_snow
acadia_2010_03_09_120400.jpg	0	no_snow
acadia_2010_03_10_120500.jpg	0	no_snow
acadia_2010_03_11_120500.jpg	0	no_snow
acadia_2010_03_12_120300.jpg	0	no_snow
acadia_2010_03_13_120200.jpg	0	no_snow
acadia_2010_03_14_120200.jpg	0	no_snow
acadia_2010_03_15_120600.jpg	0	no_snow
acadia_2010_03_16_120300.jpg	0	no_snow
acadia_2010_03_17_120500.jpg	0	no_snow
acadia_2010_03_18_120500.jpg	0	no_snow
acadia_2010_03_19_120500.jpg	0	no_snow
acadia_2010_03_20_120300.jpg	0	no_snow
acadia_2010_03_21_120200.jpg	0	no_snow
acadia_2010_03_22_120400.jpg	0	no_snow
acadia_2010_03_23_120200.jpg	0	no_snow
acadia_2010_03_24_120200.jpg	0	no_snow
acadia_2010_03_25_120300.jpg	0	no_snow
acadia_2010_03_26_120300.jpg	2	snow_on_trees
acadia_2010_03_27_120200.jpg	0	no_snow
acadia_2010_03_28_120800.jpg	0	no_snow
acadia_2010_03_29_120400.jpg	0	no_snow
acadia_2010_03_31_120600.jpg	0	no_snow
acadia_2010_04_01_120400.jpg	0	no_snow
acadia_2010_04_02_120500.jpg	0	no_snow
acadia_2010_04_03_120200.jpg	0	no_snow
acadia_2010_04_04_120200.jpg	0	no_snow
acadia_2010_04_05_120300.jpg	0	no_snow
acadia_2010_04_06_120200.jpg	0	no_snow
acadia_2010_04_07_120400.jpg	0	no_snow
acadia_2010_04_08_120400.jpg	0	no_snow
acadia_2010_04_10_120200.jpg	0	no_snow
acadia_2010_04_11_120200.jpg	0	no_snow
acadia_2010_04_12_120200.jpg	0	no_snow
acadia_2010_04_13_120400.jpg	0	no_snow
acadia_2010_04_14_120400.jpg	0	no_snow
acadia_2010_04_15_120400.jpg	0	no_snow
acadia_2010_04_16_120600.jpg	0	no_snow
acadia_2010_04_17_120200.jpg	0	no_snow
acadia_2010_04_18_120200.jpg	0	no_snow
acadia_2010_04_19_120400.jpg	0	no_snow
acadia_2010_04_20_120600.jpg	0	no_snow
acadia_2010_04_21_120400.jpg	0	no_snow
acadia_2010_04_22_120300.jpg	0	no_snow
acadia_2010_04_23_120200.jpg	0	no_snow
acadia_2010_04_24_120200.jpg	0	no_snow
acadia_2010_04_25_120400.jpg	0	no_snow
acadia_2010_04_26_120600.jpg	0	no_snow
acadia_2010_04_27_120400.jpg	0	no_snow
acadia_2010_04_28_120400.jpg	0	no_snow
acadia_2010_04_29_120400.jpg	0	no_snow
acadia_2010_04_30_120400.jpg	0	no_snow
acadia_2010_05_01_120100.jpg	0	no_snow
acadia_2010_05_02_120200.jpg	0	no_snow
acadia_2010_05_03_120200.jpg	0	no_snow
acadia_2010_05_04_120200.jpg	0	no_snow
acadia_2010_05_05_120200.jpg	0	no_snow
acadia_2010_05_06_120200.jpg	0	no_snow
acadia_2010_05_07_120100.jpg	0	no_snow
acadia_2010_05_08_120200.jpg	0	no_snow
acadia_2010_05_09_120100.jpg	0	no_snow
acadia_2010_05_10_120100.jpg	0	no_snow
acadia_2010_05_11_120100.jpg	0	no_snow
acadia_2010_05_12_120100.jpg	0	no_snow
acadia_2010_05_13_120000.jpg	0	no_snow
acadia_2010_05_14_120100.jpg	0	no_snow
acadia_2010_05_15_120100.jpg	0	no_snow
acadia_2010_05_16_120100.jpg	0	no_snow
acadia_2010_05_17_120100.jpg	0	no_snow
acadia_2010_05_18_120200.jpg	0	no_snow
acadia_2010_05_20_120200.jpg	0	no_snow
acadia_2010_05_21_120200.jpg	0	no_snow
acadia_2010_05_22_120100.jpg	0	no_snow
acadia_2010_05_23_100100.jpg	0	no_snow
acadia_2010_05_24_120200.jpg	0	no_snow
acadia_2010_05_25_120200.jpg	0	no_snow
acadia_2010_05_26_120200.jpg	0	no_snow
acadia_2010_05_27_120300.jpg	0	no_snow
acadia_2010_05_28_120200.jpg	0	no_snow
acadia_2010_05_29_120100.jpg	0	no_snow
acadia_2010_05_30_120100.jpg	0	no_snow
acadia_2010_05_31_120100.jpg	0	no_snow
acadia_2010_06_01_120200.jpg	0	no_snow
acadia_2010_06_02_120100.jpg	0	no_snow
acadia_2010_06_03_120200.jpg	0	no_snow
acadia_2010_06_04_120200.jpg	0	no_snow
acadia_2010_06_07_120200.jpg	0	no_snow
acadia_2010_06_08_120200.jpg	0	no_snow
acadia_2010_06_09_120100.jpg	0	no_snow
acadia_2010_06_10_120100.jpg	0	no_snow
acadia_2010_06_11_120100.jpg	0	no_snow
acadia_2010_06_12_120100.jpg	0	no_snow
acadia_2010_06_14_120300.jpg	0	no_snow
acadia_2010_06_15_120200.jpg	0	no_snow
acadia_2010_06_16_080000.jpg	0	no_snow
acadia_2010_06_18_120100.jpg	0	no_snow
acadia_2010_06_19_120100.jpg	0	no_snow
acadia_2010_06_20_070100.jpg	0	no_snow
acadia_2010_06_21_120200.jpg	0	no_snow
acadia_2010_06_22_120000.jpg	0	no_snow
acadia_2010_06_23_120000.jpg	0	no_snow
acadia_2010_06_24_120000.jpg	0	no_snow
acadia_2010_06_25_120000.jpg	0	no_snow
acadia_2010_06_26_120000.jpg	0	no_snow
acadia_2010_06_28_110000.jpg	0	no_snow
acadia_2010_06_29_120000.jpg	0	no_snow
acadia_2010_06_30_120000.jpg	0	no_snow
acadia_2010_07_01_120000.jpg	0	no_snow
acadia_2010_07_02_120000.jpg	0	no_snow
acadia_2010_07_03_120000.jpg	0	no_snow
acadia_2010_07_04_120000.jpg	0	no_snow
acadia_2010_07_05_120000.jpg	0	no_snow
acadia_2010_07_06_120000.jpg	0	no_snow
acadia_2010_07_07_120100.jpg	0	no_snow
acadia_2010_07_08_120000.jpg	0	no_snow
acadia_2010_07_09_120000.jpg	0	no_snow
acadia_2010_07_10_120000.jpg	0	no_snow
acadia_2010_07_11_120000.jpg	0	no_snow
acadia_2010_07_12_120000.jpg	0	no_snow
acadia_2010_07_13_120000.jpg	0	no_snow
acadia_2010_07_15_120000.jpg	0	no_snow
acadia_2010_07_16_120000.jpg	0	no_snow
acadia_2010_07_17_120000.jpg	0	no_snow
acadia_2010_07_18_120000.jpg	0	no_snow
acadia_2010_07_19_120000.jpg	0	no_snow
acadia_2010_07_20_120000.jpg	0	no_snow
acadia_2010_07_21_120000.jpg	0	no_snow
acadia_2010_07_22_120000.jpg	0	no_snow
acadia_2010_07_23_120000.jpg	0	no_snow
acadia_2010_07_24_120000.jpg	0	no_snow
acadia_2010_07_25_120000.jpg	0	no_snow
acadia_2010_07_26_120000.jpg	0	no_snow
acadia_2010_07_27_120000.jpg	0	no_snow
acadia_2010_07_28_120000.jpg	0	no_snow
acadia_2010_07_29_110000.jpg	0	no_snow
acadia_2010_07_30_120000.jpg	0	no_snow
acadia_2010_07_31_120000.jpg	0	no_snow
acadia_2010_08_01_120000.jpg	0	no_snow
acadia_2010_08_02_120000.jpg	0	no_snow
acadia_2010_08_03_110000.jpg	0	no_snow
acadia_2010_08_04_120000.jpg	0	no_snow
acadia_2010_08_06_120000.jpg	0	no_snow
acadia_2010_08_07_120000.jpg	0	no_snow
acadia_2010_08_08_120000.jpg	0	no_snow
acadia_2010_08_09_120000.jpg	0	no_snow
acadia_2010_08_10_120000.jpg	0	no_snow
acadia_2010_08_11_120000.jpg	0	no_snow
acadia_2010_08_12_120000.jpg	0	no_snow
acadia_2010_08_13_120000.jpg	0	no_snow
acadia_2010_08_14_120000.jpg	0	no_snow
acadia_2010_08_15_120000.jpg	0	no_snow
acadia_2010_08_17_120000.jpg	0	no_snow
acadia_2010_08_18_120000.jpg	0	no_snow
acadia_2010_08_19_120000.jpg	0	no_snow
acadia_2010_08_20_120000.jpg	0	no_snow
acadia_2010_08_21_120000.jpg	0	no_snow
acadia_2010_08_22_120000.jpg	0	no_snow
acadia_2010_08_23_120000.jpg	0	no_snow
acadia_2010_08_24_120000.jpg	0	no_snow
acadia_2010_08_26_120000.jpg	0	no_snow
acadia_2010_08_27_120000.jpg	0	no_snow
acadia_2010_08_28_120000.jpg	0	no_snow
acadia_2010_08_29_120000.jpg	0	no_snow
acadia_2010_08_30_120000.jpg	0	no_snow
acadia_2010_08_31_120000.jpg	0	no_snow
acadia_2010_09_01_120000.jpg	0	no_snow
acadia_2010_09_02_120000.jpg	0	no_snow
acadia_2010_09_03_120000.jpg	0	no_snow
acadia_2010_09_04_120000.jpg	0	no_snow
acadia_2010_09_05_120000.jpg	0	no_snow
acadia_2010_09_06_120000.jpg	0	no_snow
acadia_2010_09_07_120000.jpg	0	no_snow
acadia_2010_09_08_120000.jpg	0	no_snow
acadia_2010_09_09_120000.jpg	0	no_snow
acadia_2010_09_10_120000.jpg	0	no_snow
acadia_2010_09_11_120000.jpg	0	no_snow
acadia_2010_09_12_120000.jpg	0	no_snow
acadia_2010_09_13_120000.jpg	0	no_snow
acadia_2010_09_14_080000.jpg	0	no_snow
acadia_2010_09_17_120000.jpg	0	no_snow
acadia_2010_09_18_120000.jpg	0	no_snow
acadia_2010_09_19_120000.jpg	0	no_snow
acadia_2010_09_20_120000.jpg	0	no_snow
acadia_2010_09_21_120000.jpg	0	no_snow
acadia_2010_09_22_120000.jpg	0	no_snow
acadia_2010_09_23_120000.jpg	0	no_snow
acadia_2010_09_24_120000.jpg	0	no_snow
acadia_2010_09_25_120000.jpg	0	no_snow
acadia_2010_09_27_120000.jpg	0	no_snow
acadia_2010_09_28_120000.jpg	0	no_snow
acadia_2010_09_29_120000.jpg	0	no_snow
acadia_2010_09_30_120000.jpg	0	no_snow
acadia_2010_10_01_120000.jpg	0	no_snow
acadia_2010_10_02_120000.jpg	0	no_snow
acadia_2010_10_03_120000.jpg	0	no_snow
acadia_2010_10_04_120000.jpg	0	no_snow
acadia_2010_10_05_120000.jpg	0	no_snow
acadia_2010_10_06_120000.jpg	0	no_snow
acadia_2010_10_07_120000.jpg	0	no_snow
acadia_2010_10_08_120000.jpg	0	no_snow
acadia_2010_10_09_120000.jpg	0	no_snow
acadia_2010_10_10_120000.jpg	0	no_snow
acadia_2010_10_11_120000.jpg	0	no_snow
acadia_2010_10_12_120000.jpg	0	no_snow
acadia_2010_10_13_120000.jpg	0	no_snow
acadia_2010_10_14_120000.jpg	0	no_snow
acadia_2010_10_17_120000.jpg	0	no_snow
acadia_2010_10_18_120000.jpg	0	no_snow
acadia_2010_10_19_120000.jpg	0	no_snow
acadia_2010_10_20_120000.jpg	0	no_snow
acadia_2010_10_21_120000.jpg	0	no_snow
acadia_2010_10_22_120000.jpg	0	no_snow
acadia_2010_10_23_120000.jpg	0	no_snow
acadia_2010_10_24_120000.jpg	0	no_snow
acadia_2010_10_25_120000.jpg	0	no_snow
acadia_2010_10_26_120000.jpg	0	no_snow
acadia_2010_10_28_120000.jpg	0	no_snow
acadia_2010_10_29_120000.jpg	0	no_snow
acadia_2010_10_30_120000.jpg	0	no_snow
acadia_2010_10_31_120000.jpg	0	no_snow
acadia_2010_11_01_120000.jpg	0	no_snow
acadia_2010_11_02_120000.jpg	0	no_snow
acadia_2010_11_03_120000.jpg	0	no_snow
acadia_2010_11_04_120000.jpg	0	no_snow
acadia_2010_11_06_120000.jpg	0	no_snow
acadia_2010_11_07_120000.jpg	0	no_snow
acadia_2010_11_08_120000.jpg	0	no_snow
acadia_2010_11_10_130000.jpg	0	no_snow
acadia_2010_11_11_120000.jpg	0	no_snow
acadia_2010_11_12_120000.jpg	0	no_snow
acadia_2010_11_15_150000.jpg	0	no_snow
acadia_2010_11_18_120000.jpg	0	no_snow
acadia_2010_11_19_120000.jpg	0	no_snow
acadia_2010_11_22_130100.jpg	0	no_snow
acadia_2010_11_24_120000.jpg	0	no_snow
acadia_2010_11_25_110000.jpg	0	no_snow
acadia_2010_11_26_120000.jpg	0	no_snow
acadia_2010_11_27_100000.jpg	2	snow_on_trees
acadia_2010_11_28_120000.jpg	0	no_snow
acadia_2010_11_29_120000.jpg	0	no_snow
acadia_2010_11_30_120000.jpg	0	no_snow
acadia_2010_12_01_120000.jpg	0	no_snow
acadia_2010_12_02_120000.jpg	0	no_snow
acadia_2010_12_07_120000.jpg	2	snow_on_trees
acadia_2010_12_08_120000.jpg	3	snow_on_ground
acadia_2010_12_09_120000.jpg	3	snow_on_ground
acadia_2010_12_10_120000.jpg	3	snow_on_ground
acadia_2010_12_11_120000.jpg	3	snow_on_ground
acadia_2010_12_12_120000.jpg	3	snow_on_ground
acadia_2010_12_14_120000.jpg	0	no_snow
acadia_2010_12_16_120000.jpg	2	snow_on_trees
acadia_2010_12_17_110000.jpg	2	snow_on_trees
acadia_2010_12_18_120000.jpg	3	snow_on_ground
acadia_2010_12_20_140000.jpg	3	snow_on_ground
acadia_2010_12_22_120000.jpg	3	snow_on_ground
acadia_2010_12_23_120100.jpg	2	snow_on_trees
acadia_2010_12_24_120000.jpg	2	snow_on_trees
acadia_2010_12_25_120000.jpg	3	snow_on_ground
acadia_2010_12_26_120000.jpg	3	snow_on_ground
acadia_2010_12_28_120000.jpg	2	snow_on_trees
acadia_2010_12_29_120000.jpg	2	snow_on_trees
acadia_2010_12_30_120100.jpg	2	snow_on_trees
acadia_2010_12_31_120000.jpg	3	snow_on_ground
acadia_2011_01_01_120000.jpg	3	snow_on_ground
acadia_2011_01_03_140000.jpg	3	snow_on_ground
acadia_2011_01_04_120000.jpg	3	snow_on_ground
acadia_2011_01_05_120000.jpg	3	snow_on_ground
acadia_2011_01_06_120000.jpg	3	snow_on_ground
acadia_2011_01_07_120000.jpg	3	snow_on_ground
acadia_2011_01_08_120000.jpg	3	snow_on_ground
acadia_2011_01_09_120000.jpg	2	snow_on_trees
acadia_2011_01_10_120000.jpg	3	snow_on_ground
acadia_2011_01_11_120000.jpg	3	snow_on_ground
acadia_2011_01_13_120000.jpg	2	snow_on_trees
acadia_2011_01_14_120000.jpg	2	snow_on_trees
acadia_2011_01_15_120000.jpg	2	snow_on_trees
acadia_2011_01_16_120000.jpg	3	snow_on_ground
acadia_2011_01_17_120000.jpg	2	snow_on_trees
acadia_2011_01_18_120000.jpg	3	snow_on_ground
acadia_2011_01_19_120000.jpg	3	snow_on_ground
acadia_2011_01_20_120000.jpg	2	snow_on_trees
acadia_2011_01_23_120000.jpg	2	snow_on_trees
acadia_2011_01_24_120000.jpg	2	snow_on_trees
acadia_2011_01_25_120000.jpg	2	snow_on_trees
acadia_2011_01_26_120000.jpg	2	snow_on_trees
acadia_2011_01_27_120000.jpg	2	snow_on_trees
acadia_2011_01_28_110000.jpg	2	snow_on_trees
acadia_2011_01_31_120000.jpg	2	snow_on_trees
acadia_2011_02_01_120000.jpg	2	snow_on_trees
acadia_2011_02_03_120000.jpg	2	snow_on_trees
acadia_2011_02_04_120000.jpg	3	snow_on_ground
acadia_2011_02_05_120000.jpg	3	snow_on_ground
acadia_2011_02_06_120000.jpg	3	snow_on_ground
acadia_2011_02_07_120000.jpg	3	snow_on_ground
acadia_2011_02_09_120000.jpg	2	snow_on_trees
acadia_2011_02_10_120000.jpg	2	snow_on_trees
acadia_2011_02_11_120000.jpg	3	snow_on_ground
acadia_2011_02_12_120000.jpg	3	snow_on_ground
acadia_2011_02_13_120000.jpg	3	snow_on_ground
acadia_2011_02_14_120000.jpg	3	snow_on_ground
acadia_2011_02_15_120000.jpg	3	snow_on_ground
acadia_2011_02_16_120000.jpg	3	snow_on_ground
acadia_2011_02_17_120000.jpg	3	snow_on_ground
acadia_2011_02_18_120000.jpg	2	snow_on_trees
acadia_2011_02_19_120000.jpg	3	snow_on_ground
acadia_2011_02_20_120000.jpg	3	snow_on_ground
acadia_2011_02_21_120000.jpg	3	snow_on_ground
acadia_2011_02_22_120000.jpg	3	snow_on_ground
acadia_2011_02_23_120000.jpg	3	snow_on_ground
acadia_2011_02_24_120000.jpg	3	snow_on_ground
acadia_2011_02_26_120000.jpg	2	snow_on_trees
acadia_2011_02_27_120000.jpg	2	snow_on_trees
acadia_2011_03_01_120000.jpg	3	snow_on_ground
acadia_2011_03_02_120000.jpg	3	snow_on_ground
acadia_2011_03_03_120000.jpg	3	snow_on_ground
acadia_2011_03_04_120000.jpg	3	snow_on_ground
acadia_2011_03_05_120000.jpg	3	snow_on_ground
acadia_2011_03_06_120000.jpg	3	snow_on_ground
acadia_2011_03_08_120000.jpg	3	snow_on_ground
acadia_2011_03_09_120000.jpg	3	snow_on_ground
acadia_2011_03_10_120000.jpg	3	snow_on_ground
acadia_2011_03_12_120000.jpg	3	snow_on_ground
acadia_2011_03_13_120000.jpg	3	snow_on_ground
acadia_2011_03_14_120000.jpg	3	snow_on_ground
acadia_2011_03_15_120000.jpg	3	snow_on_ground
acadia_2011_03_16_120000.jpg	3	snow_on_ground
acadia_2011_03_17_120000.jpg	3	snow_on_ground
acadia_2011_03_18_120000.jpg	0	no_snow
acadia_2011_03_19_120000.jpg	0	no_snow
acadia_2011_03_20_120000.jpg	0	no_snow
acadia_2011_03_21_120000.jpg	0	no_snow
acadia_2011_03_22_120000.jpg	2	snow_on_trees
acadia_2011_03_23_120000.jpg	3	snow_on_ground
acadia_2011_03_24_120000.jpg	2	snow_on_trees
acadia_2011_03_25_120000.jpg	3	snow_on_ground
acadia_2011_03_26_120000.jpg	2	snow_on_trees
acadia_2011_03_27_120000.jpg	3	snow_on_ground
acadia_2011_03_28_120000.jpg	3	snow_on_ground
acadia_2011_03_29_120000.jpg	0	no_snow
acadia_2011_03_30_120000.jpg	0	no_snow
acadia_2011_03_31_120000.jpg	0	no_snow
acadia_2011_04_04_120000.jpg	3	snow_on_ground
acadia_2011_04_06_120000.jpg	0	no_snow
acadia_2011_04_07_120000.jpg	0	no_snow
acadia_2011_04_08_120000.jpg	0	no_snow
acadia_2011_04_09_140000.jpg	0	no_snow
acadia_2011_04_11_120000.jpg	0	no_snow
acadia_2011_04_12_120000.jpg	0	no_snow
acadia_2011_04_14_120000.jpg	0	no_snow
acadia_2011_04_15_120000.jpg	0	no_snow
acadia_2011_04_16_120000.jpg	0	no_snow
acadia_2011_04_18_120000.jpg	0	no_snow
acadia_2011_04_19_120000.jpg	0	no_snow
acadia_2011_04_21_120000.jpg	0	no_snow
acadia_2011_04_22_120000.jpg	0	no_snow
acadia_2011_04_23_120000.jpg	0	no_snow
acadia_2011_04_24_120000.jpg	0	no_snow
acadia_2011_04_25_120000.jpg	0	no_snow
acadia_2011_04_27_120000.jpg	0	no_snow
acadia_2011_04_29_120000.jpg	0	no_snow
acadia_2011_04_30_120000.jpg	0	no_snow
acadia_2011_05_01_120000.jpg	0	no_snow
acadia_2011_05_02_120000.jpg	0	no_snow
acadia_2011_05_03_120000.jpg	0	no_snow
acadia_2011_05_04_120000.jpg	0	no_snow
acadia_2011_05_06_120000.jpg	0	no_snow
acadia_2011_05_07_120000.jpg	0	no_snow
acadia_2011_05_08_120000.jpg	0	no_snow
acadia_2011_05_09_120000.jpg	0	no_snow
acadia_2011_05_11_120000.jpg	0	no_snow
acadia_2011_05_12_120000.jpg	0	no_snow
acadia_2011_05_13_120000.jpg	0	no_snow
acadia_2011_05_14_120000.jpg	0	no_snow
acadia_2011_05_15_120000.jpg	0	no_snow
acadia_2011_05_22_120000.jpg	0	no_snow
acadia_2011_05_23_120000.jpg	0	no_snow
acadia_2011_05_25_120000.jpg	0	no_snow
acadia_2011_05_26_120000.jpg	0	no_snow
acadia_2011_05_27_120000.jpg	0	no_snow
acadia_2011_05_29_120000.jpg	0	no_snow
acadia_2011_05_30_120000.jpg	0	no_snow
acadia_2011_05_31_110000.jpg	0	no_snow
acadia_2011_06_01_120000.jpg	0	no_snow
acadia_2011_06_02_120000.jpg	0	no_snow
acadia_2011_06_03_110000.jpg	0	no_snow
acadia_2011_06_06_120000.jpg	0	no_snow
acadia_2011_06_07_120000.jpg	0	no_snow
acadia_2011_06_08_120000.jpg	0	no_snow
acadia_2011_06_09_120000.jpg	0	no_snow
acadia_2011_06_11_120000.jpg	0	no_snow
acadia_2011_06_15_120000.jpg	0	no_snow
acadia_2011_06_16_120000.jpg	0	no_snow
acadia_2011_06_17_120000.jpg	0	no_snow
acadia_2011_06_19_120000.jpg	0	no_snow
acadia_2011_06_20_110000.jpg	0	no_snow
acadia_2011_06_21_120000.jpg	0	no_snow
acadia_2011_06_22_120000.jpg	0	no_snow
acadia_2011_06_24_120000.jpg	0	no_snow
acadia_2011_06_26_120000.jpg	0	no_snow
acadia_2011_06_27_120000.jpg	0	no_snow
acadia_2011_06_28_120000.jpg	0	no_snow
acadia_2011_06_29_120000.jpg	0	no_snow
acadia_2011_06_30_120000.jpg	0	no_snow
acadia_2011_07_01_120000.jpg	0	no_snow
acadia_2011_07_02_120000.jpg	0	no_snow
acadia_2011_07_03_120000.jpg	0	no_snow
acadia_2011_07_04_120000.jpg	0	no_snow
acadia_2011_07_05_120000.jpg	0	no_snow
acadia_2011_07_06_120000.jpg	0	no_snow
acadia_2011_07_07_120000.jpg	0	no_snow
acadia_2011_07_08_120000.jpg	0	no_snow
acadia_2011_07_09_120000.jpg	0	no_snow
acadia_2011_07_10_110000.jpg	0	no_snow
acadia_2011_07_11_120000.jpg	0	no_snow
acadia_2011_07_12_120000.jpg	0	no_snow
acadia_2011_07_13_120000.jpg	0	no_snow
acadia_2011_07_14_120000.jpg	0	no_snow
acadia_2011_07_15_120000.jpg	0	no_snow
acadia_2011_07_16_120000.jpg	0	no_snow
acadia_2011_07_17_120000.jpg	0	no_snow
acadia_2011_07_18_120000.jpg	0	no_snow
acadia_2011_07_19_120000.jpg	0	no_snow
acadia_2011_07_20_120000.jpg	0	no_snow
acadia_2011_07_21_120000.jpg	0	no_snow
acadia_2011_07_22_120000.jpg	0	no_snow
acadia_2011_07_23_120000.jpg	0	no_snow
acadia_2011_07_24_120000.jpg	0	no_snow
acadia_2011_07_25_120000.jpg	0	no_snow
acadia_2011_07_26_120000.jpg	0	no_snow
acadia_2011_07_27_120000.jpg	0	no_snow
acadia_2011_07_28_120000.jpg	0	no_snow
acadia_2011_07_29_120000.jpg	0	no_snow
acadia_2011_07_30_120000.jpg	0	no_snow
acadia_2011_07_31_120000.jpg	0	no_snow
acadia_2011_08_01_120000.jpg	0	no_snow
acadia_2011_08_03_120000.jpg	0	no_snow
acadia_2011_08_05_120000.jpg	0	no_snow
acadia_2011_08_06_120000.jpg	0	no_snow
acadia_2011_08_07_120000.jpg	0	no_snow
acadia_2011_08_08_120000.jpg	0	no_snow
acadia_2011_08_09_120000.jpg	0	no_snow
acadia_2011_08_11_120000.jpg	0	no_snow
acadia_2011_08_12_120000.jpg	0	no_snow
acadia_2011_08_13_120000.jpg	0	no_snow
acadia_2011_08_14_120000.jpg	0	no_snow
acadia_2011_08_15_120000.jpg	0	no_snow
acadia_2011_08_17_120000.jpg	0	no_snow
acadia_2011_08_18_120000.jpg	0	no_snow
acadia_2011_08_19_120000.jpg	0	no_snow
acadia_2011_08_20_120000.jpg	0	no_snow
acadia_2011_08_21_120000.jpg	0	no_snow
acadia_2011_08_22_120000.jpg	0	no_snow
acadia_2011_08_23_110000.jpg	0	no_snow
acadia_2011_08_24_120000.jpg	0	no_snow
acadia_2011_08_25_120000.jpg	0	no_snow
acadia_2011_08_26_120000.jpg	0	no_snow
acadia_2011_08_27_120000.jpg	0	no_snow
acadia_2011_08_29_120000.jpg	0	no_snow
acadia_2011_08_30_120000.jpg	0	no_snow
acadia_2011_08_31_120000.jpg	0	no_snow
acadia_2011_09_01_120000.jpg	0	no_snow
acadia_2011_09_02_120000.jpg	0	no_snow
acadia_2011_09_03_120000.jpg	0	no_snow
acadia_2011_09_04_120000.jpg	0	no_snow
acadia_2011_09_05_120000.jpg	0	no_snow
acadia_2011_09_06_120000.jpg	0	no_snow
acadia_2011_09_08_120000.jpg	0	no_snow
acadia_2011_09_09_140000.jpg	0	no_snow
acadia_2011_09_10_120000.jpg	0	no_snow
acadia_2011_09_11_120000.jpg	0	no_snow
acadia_2011_09_12_120000.jpg	0	no_snow
acadia_2011_09_13_120004.jpg	0	no_snow
acadia_2011_09_14_120001.jpg	0	no_snow
acadia_2011_09_15_120002.jpg	0	no_snow
acadia_2011_09_16_120001.jpg	0	no_snow
acadia_2011_09_17_120001.jpg	0	no_snow
acadia_2011_09_18_120001.jpg	0	no_snow
acadia_2011_09_19_120001.jpg	0	no_snow
acadia_2011_09_20_120001.jpg	0	no_snow
acadia_2011_09_21_120001.jpg	0	no_snow
acadia_2011_09_23_120001.jpg	0	no_snow
acadia_2011_09_25_120001.jpg	0	no_snow
acadia_2011_09_26_120001.jpg	0	no_snow
acadia_2011_09_27_120001.jpg	0	no_snow
acadia_2011_09_28_120001.jpg	0	no_snow
acadia_2011_09_29_120001.jpg	0	no_snow
acadia_2011_09_30_120001.jpg	0	no_snow
acadia_2011_10_03_120001.jpg	0	no_snow
acadia_2011_10_05_120002.jpg	0	no_snow
acadia_2011_10_06_120001.jpg	0	no_snow
acadia_2011_10_07_120001.jpg	0	no_snow
acadia_2011_10_08_120001.jpg	0	no_snow
acadia_2011_10_09_120001.jpg	0	no_snow
acadia_2011_10_10_120001.jpg	0	no_snow
acadia_2011_10_11_120001.jpg	0	no_snow
acadia_2011_10_12_120001.jpg	0	no_snow
acadia_2011_10_15_120001.jpg	0	no_snow
acadia_2011_10_16_120001.jpg	0	no_snow
acadia_2011_10_17_120001.jpg	0	no_snow
acadia_2011_10_18_120001.jpg	0	no_snow
acadia_2011_10_19_120001.jpg	0	no_snow
acadia_2011_10_21_120001.jpg	0	no_snow
acadia_2011_10_22_120003.jpg	0	no_snow
acadia_2011_10_23_120002.jpg	0	no_snow
acadia_2011_10_24_120001.jpg	0	no_snow
acadia_2011_10_25_120001.jpg	0	no_snow
acadia_2011_10_26_120001.jpg	0	no_snow
acadia_2011_10_27_120001.jpg	0	no_snow
acadia_2011_10_28_120001.jpg	0	no_snow
acadia_2011_10_29_120001.jpg	0	no_snow
acadia_2011_10_30_120001.jpg	2	snow_on_trees
acadia_2011_10_31_110001.jpg	0	no_snow
acadia_2011_11_01_120001.jpg	0	no_snow
acadia_2011_11_02_120001.jpg	0	no_snow
acadia_2011_11_03_120002.jpg	0	no_snow
acadia_2011_11_04_120001.jpg	0	no_snow
acadia_2011_11_05_120001.jpg	0	no_snow
acadia_2011_11_06_120001.jpg	0	no_snow
acadia_2011_11_07_120001.jpg	0	no_snow
acadia_2011_11_08_120001.jpg	0	no_snow
acadia_2011_11_09_120002.jpg	0	no_snow
acadia_2011_11_10_120001.jpg	0	no_snow
acadia_2011_11_11_120002.jpg	0	no_snow
acadia_2011_11_12_120001.jpg	0	no_snow
acadia_2011_11_13_120001.jpg	0	no_snow
acadia_2011_11_14_120001.jpg	0	no_snow
acadia_2011_11_15_120001.jpg	0	no_snow
acadia_2011_11_16_120001.jpg	0	no_snow
acadia_2011_11_17_120001.jpg	0	no_snow
acadia_2011_11_18_120001.jpg	0	no_snow
acadia_2011_11_19_120001.jpg	0	no_snow
acadia_2011_11_20_120001.jpg	0	no_snow
acadia_2011_11_21_120001.jpg	0	no_snow
acadia_2011_11_22_120001.jpg	0	no_snow
acadia_2011_11_24_120001.jpg	2	snow_on_trees
acadia_2011_11_25_120001.jpg	3	snow_on_ground
acadia_2011_11_26_120001.jpg	2	snow_on_trees
acadia_2011_11_27_120002.jpg	3	snow_on_ground
acadia_2011_11_28_120001.jpg	0	no_snow
acadia_2011_11_29_120002.jpg	0	no_snow
acadia_2011_11_30_120001.jpg	0	no_snow
acadia_2011_12_01_120002.jpg	0	no_snow
acadia_2011_12_04_120002.jpg	0	no_snow
acadia_2011_12_12_120001.jpg	0	no_snow
acadia_2011_12_13_120001.jpg	0	no_snow
acadia_2011_12_14_120001.jpg	0	no_snow
acadia_2011_12_15_120001.jpg	0	no_snow
acadia_2011_12_16_120001.jpg	0	no_snow
acadia_2011_12_18_120001.jpg	0	no_snow
acadia_2011_12_19_120004.jpg	0	no_snow
acadia_2011_12_20_120001.jpg	0	no_snow
acadia_2011_12_22_120001.jpg	0	no_snow
acadia_2011_12_24_120001.jpg	2	snow_on_trees
acadia_2011_12_25_120001.jpg	2	snow_on_trees
acadia_2011_12_26_120001.jpg	2	snow_on_trees
acadia_2011_12_27_120001.jpg	3	snow_on_ground
acadia_2011_12_28_120001.jpg	0	no_snow
acadia_2011_12_29_120001.jpg	0	no_snow
acadia_2011_12_30_120001.jpg	0	no_snow
acadia_2011_12_31_120001.jpg	0	no_snow
acadia_2012_01_01_120001.jpg	0	no_snow
acadia_2012_01_02_120001.jpg	0	no_snow
acadia_2012_01_03_120001.jpg	0	no_snow
acadia_2012_01_04_120001.jpg	0	no_snow
acadia_2012_01_05_120001.jpg	0	no_snow
acadia_2012_01_06_120001.jpg	0	no_snow
acadia_2012_01_08_120002.jpg	0	no_snow
acadia_2012_01_11_120001.jpg	0	no_snow
acadia_2012_01_12_110001.jpg	0	no_snow
acadia_2012_01_14_120001.jpg	3	snow_on_ground
acadia_2012_01_15_120001.jpg	3	snow_on_ground
acadia_2012_01_16_120001.jpg	3	snow_on_ground
acadia_2012_01_17_120002.jpg	3	snow_on_ground
acadia_2012_01_18_120001.jpg	3	snow_on_ground
acadia_2012_01_19_120001.jpg	3	snow_on_ground
acadia_2012_01_20_120001.jpg	2	snow_on_trees
acadia_2012_01_21_120001.jpg	2	snow_on_trees
acadia_2012_01_22_120001.jpg	2	snow_on_trees
acadia_2012_01_23_120002.jpg	3	snow_on_ground
acadia_2012_01_25_120001.jpg	0	no_snow
acadia_2012_01_26_120001.jpg	0	no_snow
acadia_2012_01_28_120001.jpg	3	snow_on_ground
acadia_2012_01_29_120001.jpg	0	no_snow
acadia_2012_01_30_120001.jpg	3	snow_on_ground
acadia_2012_01_31_120001.jpg	3	snow_on_ground
acadia_2012_02_01_120001.jpg	3	snow_on_ground
acadia_2012_02_02_120003.jpg	3	snow_on_ground
acadia_2012_02_03_120001.jpg	0	no_snow
acadia_2012_02_04_120001.jpg	0	no_snow
acadia_2012_02_05_120001.jpg	3	snow_on_ground
acadia_2012_02_06_120001.jpg	0	no_snow
acadia_2012_02_07_120001.jpg	0	no_snow
acadia_2012_02_08_120001.jpg	0	no_snow
acadia_2012_02_09_120001.jpg	0	no_snow
acadia_2012_02_10_120002.jpg	0	no_snow
acadia_2012_02_12_120001.jpg	2	snow_on_trees
acadia_2012_02_13_120001.jpg	3	snow_on_ground
acadia_2012_02_14_120001.jpg	3	snow_on_ground
acadia_2012_02_15_120001.jpg	3	snow_on_ground
acadia_2012_02_16_120001.jpg	3	snow_on_ground
acadia_2012_02_17_120001.jpg	0	no_snow
acadia_2012_02_18_120001.jpg	0	no_snow
acadia_2012_02_19_120001.jpg	0	no_snow
acadia_2012_02_20_120001.jpg	0	no_snow
acadia_2012_02_21_140001.jpg	0	no_snow
acadia_2012_02_22_120001.jpg	0	no_snow
acadia_2012_02_23_120001.jpg	0	no_snow
acadia_2012_02_24_120001.jpg	0	no_snow
acadia_2012_02_25_120001.jpg	0	no_snow
acadia_2012_02_26_120001.jpg	0	no_snow
acadia_2012_02_27_120001.jpg	0	no_snow
acadia_2012_02_28_120001.jpg	0	no_snow
acadia_2012_02_29_120001.jpg	0	no_snow
acadia_2012_03_01_120001.jpg	0	no_snow
acadia_2012_03_02_120001.jpg	2	snow_on_trees
acadia_2012_03_04_120001.jpg	3	snow_on_ground
acadia_2012_03_05_120001.jpg	2	snow_on_trees
acadia_2012_03_06_120001.jpg	3	snow_on_ground
acadia_2012_03_07_120002.jpg	0	no_snow
acadia_2012_03_08_120001.jpg	0	no_snow
acadia_2012_03_09_120001.jpg	0	no_snow
acadia_2012_03_10_120001.jpg	0	no_snow
acadia_2012_03_11_120002.jpg	0	no_snow
acadia_2012_03_12_120001.jpg	0	no_snow
acadia_2012_03_13_120001.jpg	0	no_snow
acadia_2012_03_15_120001.jpg	0	no_snow
acadia_2012_03_16_120001.jpg	0	no_snow
acadia_2012_03_17_120001.jpg	0	no_snow
acadia_2012_03_18_120001.jpg	0	no_snow
acadia_2012_03_19_120001.jpg	0	no_snow
acadia_2012_03_20_120001.jpg	0	no_snow
acadia_2012_03_21_120001.jpg	0	no_snow
acadia_2012_03_22_120001.jpg	0	no_snow
acadia_2012_03_23_120001.jpg	0	no_snow
acadia_2012_03_24_120001.jpg	0	no_snow
acadia_2012_03_25_120001.jpg	0	no_snow
acadia_2012_03_26_120001.jpg	0	no_snow
acadia_2012_03_27_120001.jpg	0	no_snow
acadia_2012_03_28_120001.jpg	0	no_snow
acadia_2012_03_29_120001.jpg	2	snow_on_trees
acadia_2012_03_30_120001.jpg	2	snow_on_trees
acadia_2012_03_31_120001.jpg	0	no_snow
acadia_2012_04_01_120001.jpg	0	no_snow
acadia_2012_04_02_120001.jpg	0	no_snow
acadia_2012_04_03_120001.jpg	0	no_snow
acadia_2012_04_04_120001.jpg	0	no_snow
acadia_2012_04_05_120001.jpg	0	no_snow
acadia_2012_04_06_130001.jpg	0	no_snow
acadia_2012_04_07_120001.jpg	0	no_snow
acadia_2012_04_08_120001.jpg	0	no_snow
acadia_2012_04_09_120002.jpg	0	no_snow
acadia_2012_04_10_120001.jpg	0	no_snow
acadia_2012_04_11_110001.jpg	0	no_snow
acadia_2012_04_12_120002.jpg	0	no_snow
acadia_2012_04_13_120001.jpg	0	no_snow
acadia_2012_04_14_120001.jpg	0	no_snow
acadia_2012_04_15_120001.jpg	0	no_snow
acadia_2012_04_16_120002.jpg	0	no_snow
acadia_2012_04_17_120001.jpg	0	no_snow
acadia_2012_04_18_120001.jpg	0	no_snow
acadia_2012_04_19_120001.jpg	0	no_snow
acadia_2012_04_20_120001.jpg	0	no_snow
acadia_2012_04_21_120001.jpg	0	no_snow
acadia_2012_04_24_120001.jpg	0	no_snow
acadia_2012_04_25_120001.jpg	0	no_snow
acadia_2012_04_26_110001.jpg	0	no_snow
acadia_2012_04_28_120001.jpg	0	no_snow
acadia_2012_04_29_120001.jpg	0	no_snow
acadia_2012_04_30_120001.jpg	0	no_snow
acadia_2012_05_01_120002.jpg	0	no_snow
acadia_2012_05_02_120001.jpg	0	no_snow
acadia_2012_05_03_120002.jpg	0	no_snow
acadia_2012_05_04_120001.jpg	0	no_snow
acadia_2012_05_06_120001.jpg	0	no_snow
acadia_2012_05_07_120002.jpg	0	no_snow
acadia_2012_05_08_120001.jpg	0	no_snow
acadia_2012_05_11_120001.jpg	0	no_snow
acadia_2012_05_12_120001.jpg	0	no_snow
acadia_2012_05_13_120002.jpg	0	no_snow
acadia_2012_05_14_120002.jpg	0	no_snow
acadia_2012_05_15_120002.jpg	0	no_snow
acadia_2012_05_16_130001.jpg	0	no_snow
acadia_2012_05_17_120001.jpg	0	no_snow
acadia_2012_05_18_120001.jpg	0	no_snow
acadia_2012_05_19_120002.jpg	0	no_snow
acadia_2012_05_20_120001.jpg	0	no_snow
acadia_2012_05_21_120002.jpg	0	no_snow
acadia_2012_05_22_120001.jpg	0	no_snow
acadia_2012_05_23_120001.jpg	0	no_snow
acadia_2012_05_24_120001.jpg	0	no_snow
acadia_2012_05_25_120001.jpg	0	no_snow
acadia_2012_05_26_120001.jpg	0	no_snow
acadia_2012_05_28_120001.jpg	0	no_snow
acadia_2012_05_30_120001.jpg	0	no_snow
acadia_2012_06_01_120001.jpg	0	no_snow
acadia_2012_06_02_120001.jpg	0	no_snow
acadia_2012_06_04_120001.jpg	0	no_snow
acadia_2012_06_05_110001.jpg	0	no_snow
acadia_2012_06_06_120001.jpg	0	no_snow
acadia_2012_06_07_120001.jpg	0	no_snow
acadia_2012_06_08_120001.jpg	0	no_snow
acadia_2012_06_09_120001.jpg	0	no_snow
acadia_2012_06_10_120001.jpg	0	no_snow
acadia_2012_06_11_120001.jpg	0	no_snow
acadia_2012_06_12_120001.jpg	0	no_snow
acadia_2012_06_14_120001.jpg	0	no_snow
acadia_2012_06_15_120002.jpg	0	no_snow
acadia_2012_06_16_120001.jpg	0	no_snow
acadia_2012_06_17_120001.jpg	0	no_snow
acadia_2012_06_18_110001.jpg	0	no_snow
acadia_2012_06_19_120001.jpg	0	no_snow
acadia_2012_06_20_120001.jpg	0	no_snow
acadia_2012_06_21_120002.jpg	0	no_snow
acadia_2012_06_22_120001.jpg	0	no_snow
acadia_2012_06_25_120001.jpg	0	no_snow
acadia_2012_06_27_120001.jpg	0	no_snow
acadia_2012_06_28_120001.jpg	0	no_snow
acadia_2012_06_29_120001.jpg	0	no_snow
acadia_2012_06_30_120001.jpg	0	no_snow
acadia_2012_07_01_110001.jpg	0	no_snow
acadia_2012_07_02_120001.jpg	0	no_snow
acadia_2012_07_03_120001.jpg	0	no_snow
acadia_2012_07_05_140001.jpg	0	no_snow
acadia_2012_07_06_120001.jpg	0	no_snow
acadia_2012_07_07_120001.jpg	0	no_snow
acadia_2012_07_08_120001.jpg	0	no_snow
acadia_2012_07_09_120001.jpg	0	no_snow
acadia_2012_07_10_120001.jpg	0	no_snow
acadia_2012_07_11_120001.jpg	0	no_snow
acadia_2012_07_12_120001.jpg	0	no_snow
acadia_2012_07_13_120001.jpg	0	no_snow
acadia_2012_07_14_120001.jpg	0	no_snow
acadia_2012_07_15_120002.jpg	0	no_snow
acadia_2012_07_16_110001.jpg	0	no_snow
acadia_2012_07_17_120001.jpg	0	no_snow
acadia_2012_07_18_120001.jpg	0	no_snow
acadia_2012_07_19_120001.jpg	0	no_snow
acadia_2012_07_20_120001.jpg	0	no_snow
acadia_2012_07_21_120001.jpg	0	no_snow
acadia_2012_07_22_120001.jpg	0	no_snow
acadia_2012_07_23_120001.jpg	0	no_snow
acadia_2012_07_24_110001.jpg	0	no_snow
acadia_2012_07_25_120001.jpg	0	no_snow
acadia_2012_07_26_120001.jpg	0	no_snow
acadia_2012_07_27_110001.jpg	0	no_snow
acadia_2012_07_28_130001.jpg	0	no_snow
acadia_2012_07_29_120001.jpg	0	no_snow
acadia_2012_07_30_120001.jpg	0	no_snow
acadia_2012_07_31_110001.jpg	0	no_snow
acadia_2012_08_01_120001.jpg	0	no_snow
acadia_2012_08_02_120001.jpg	0	no_snow
acadia_2012_08_03_120001.jpg	0	no_snow
acadia_2012_08_04_120001.jpg	0	no_snow
acadia_2012_08_05_120001.jpg	0	no_snow
acadia_2012_08_06_124110.jpg	0	no_snow
acadia_2012_08_07_120001.jpg	0	no_snow
acadia_2012_08_08_120001.jpg	0	no_snow
acadia_2012_08_09_120001.jpg	0	no_snow
acadia_2012_08_10_110001.jpg	0	no_snow
acadia_2012_08_12_120002.jpg	0	no_snow
acadia_2012_08_13_120001.jpg	0	no_snow
acadia_2012_08_14_120001.jpg	0	no_snow
acadia_2012_08_15_120001.jpg	0	no_snow
acadia_2012_08_17_120001.jpg	0	no_snow
acadia_2012_08_18_120001.jpg	0	no_snow
acadia_2012_08_19_120001.jpg	0	no_snow
acadia_2012_08_20_120001.jpg	0	no_snow
acadia_2012_08_21_120001.jpg	0	no_snow
acadia_2012_08_22_120002.jpg	0	no_snow
acadia_2012_08_23_120001.jpg	0	no_snow
acadia_2012_08_24_120001.jpg	0	no_snow
acadia_2012_08_25_120001.jpg	0	no_snow
acadia_2012_08_26_120001.jpg	0	no_snow
acadia_2012_08_27_120001.jpg	0	no_snow
acadia_2012_08_28_120001.jpg	0	no_snow
acadia_2012_08_29_120002.jpg	0	no_snow
acadia_2012_08_30_120001.jpg	0	no_snow
acadia_2012_08_31_120001.jpg	0	no_snow
acadia_2012_09_04_100001.jpg	0	no_snow
acadia_2012_09_06_120001.jpg	0	no_snow
acadia_2012_09_08_120001.jpg	0	no_snow
acadia_2012_09_09_120002.jpg	0	no_snow
acadia_2012_09_10_120001.jpg	0	no_snow
acadia_2012_09_11_120001.jpg	0	no_snow
acadia_2012_09_12_120001.jpg	0	no_snow
acadia_2012_09_13_120001.jpg	0	no_snow
acadia_2012_09_14_120001.jpg	0	no_snow
acadia_2012_09_15_120001.jpg	0	no_snow
acadia_2012_09_16_120002.jpg	0	no_snow
acadia_2012_09_17_120001.jpg	0	no_snow
acadia_2012_09_18_120002.jpg	0	no_snow
acadia_2012_09_19_120001.jpg	0	no_snow
acadia_2012_09_20_120001.jpg	0	no_snow
acadia_2012_09_21_120001.jpg	0	no_snow
acadia_2012_09_22_120001.jpg	0	no_snow
acadia_2012_09_23_120001.jpg	0	no_snow
acadia_2012_09_24_120001.jpg	0	no_snow
acadia_2012_09_25_120001.jpg	0	no_snow
acadia_2012_09_26_120001.jpg	0	no_snow
acadia_2012_09_27_120001.jpg	0	no_snow
acadia_2012_09_28_120001.jpg	0	no_snow
acadia_2012_10_01_120001.jpg	0	no_snow
acadia_2012_10_02_120001.jpg	0	no_snow
acadia_2012_10_03_120001.jpg	0	no_snow
acadia_2012_10_04_120001.jpg	0	no_snow
acadia_2012_10_05_120001.jpg	0	no_snow
acadia_2012_10_06_120001.jpg	0	no_snow
acadia_2012_10_07_120001.jpg	0	no_snow
acadia_2012_10_08_120001.jpg	0	no_snow
acadia_2012_10_09_120001.jpg	0	no_snow
acadia_2012_10_11_120001.jpg	0	no_snow
acadia_2012_10_12_100001.jpg	0	no_snow
acadia_2012_10_13_120001.jpg	0	no_snow
acadia_2012_10_14_120001.jpg	0	no_snow
acadia_2012_10_15_120001.jpg	0	no_snow
acadia_2012_10_17_100001.jpg	0	no_snow
acadia_2012_10_18_120001.jpg	0	no_snow
acadia_2012_10_19_120002.jpg	0	no_snow
acadia_2012_10_20_120001.jpg	0	no_snow
acadia_2012_10_21_120001.jpg	0	no_snow
acadia_2012_10_22_120001.jpg	0	no_snow
acadia_2012_10_23_120001.jpg	0	no_snow
acadia_2012_10_24_120001.jpg	0	no_snow
acadia_2012_10_25_120001.jpg	0	no_snow
acadia_2012_10_26_120002.jpg	0	no_snow
acadia_2012_10_27_120001.jpg	0	no_snow
acadia_2012_10_28_120001.jpg	0	no_snow
acadia_2012_10_29_120001.jpg	0	no_snow
acadia_2012_10_31_120001.jpg	0	no_snow
acadia_2012_11_01_120001.jpg	0	no_snow
acadia_2012_11_02_120001.jpg	0	no_snow
acadia_2012_11_03_090001.jpg	0	no_snow
acadia_2012_11_05_130001.jpg	0	no_snow
acadia_2012_11_06_120001.jpg	0	no_snow
acadia_2012_11_07_120001.jpg	0	no_snow
acadia_2012_11_09_120001.jpg	0	no_snow
acadia_2012_11_10_120001.jpg	0	no_snow
acadia_2012_11_11_120001.jpg	0	no_snow
acadia_2012_11_12_120001.jpg	0	no_snow
acadia_2012_11_13_120001.jpg	0	no_snow
acadia_2012_11_14_120001.jpg	0	no_snow
acadia_2012_11_15_120001.jpg	0	no_snow
acadia_2012_11_16_120001.jpg	0	no_snow
acadia_2012_11_17_120002.jpg	0	no_snow
acadia_2012_11_18_120001.jpg	0	no_snow
acadia_2012_11_19_120001.jpg	0	no_snow
acadia_2012_11_20_120001.jpg	0	no_snow
acadia_2012_11_21_120001.jpg	0	no_snow
acadia_2012_11_22_120001.jpg	0	no_snow
acadia_2012_11_23_120001.jpg	0	no_snow
acadia_2012_11_24_120001.jpg	0	no_snow
acadia_2012_11_25_120001.jpg	0	no_snow
acadia_2012_11_26_120001.jpg	0	no_snow
acadia_2012_11_27_120001.jpg	0	no_snow
acadia_2012_11_28_120001.jpg	0	no_snow
acadia_2012_11_29_120001.jpg	0	no_snow
acadia_2012_11_30_120001.jpg	0	no_snow
acadia_2012_12_01_120002.jpg	0	no_snow
acadia_2012_12_02_120001.jpg	0	no_snow
acadia_2012_12_03_120001.jpg	0	no_snow
acadia_2012_12_04_120002.jpg	0	no_snow
acadia_2012_12_05_120001.jpg	0	no_snow
acadia_2012_12_06_120002.jpg	0	no_snow
acadia_2012_12_07_120001.jpg	0	no_snow
acadia_2012_12_09_120001.jpg	0	no_snow
acadia_2012_12_11_120001.jpg	0	no_snow
acadia_2012_12_12_120001.jpg	0	no_snow
acadia_2012_12_13_120001.jpg	0	no_snow
acadia_2012_12_14_120001.jpg	0	no_snow
acadia_2012_12_15_120001.jpg	0	no_snow
acadia_2012_12_16_120001.jpg	0	no_snow
acadia_2012_12_17_110001.jpg	2	snow_on_trees
acadia_2012_12_18_120001.jpg	0	no_snow
acadia_2012_12_20_120001.jpg	0	no_snow
acadia_2012_12_21_120001.jpg	0	no_snow
acadia_2012_12_22_120001.jpg	0	no_snow
acadia_2012_12_23_120001.jpg	0	no_snow
acadia_2012_12_24_120001.jpg	0	no_snow
acadia_2012_12_25_120001.jpg	0	no_snow
acadia_2012_12_26_120001.jpg	0	no_snow
acadia_2012_12_28_120001.jpg	2	snow_on_trees
acadia_2012_12_29_120001.jpg	2	snow_on_trees
acadia_2012_12_30_120001.jpg	2	snow_on_trees
acadia_2012_12_31_120001.jpg	2	snow_on_trees
acadia_2013_01_01_120001.jpg	2	snow_on_trees
acadia_2013_01_02_120002.jpg	2	snow_on_trees
acadia_2013_01_03_120002.jpg	2	snow_on_trees
acadia_2013_01_04_120001.jpg	2	snow_on_trees
acadia_2013_01_05_120001.jpg	3	snow_on_ground
acadia_2013_01_06_120001.jpg	2	snow_on_trees
acadia_2013_01_07_120001.jpg	2	snow_on_trees
acadia_2013_01_08_120001.jpg	3	snow_on_ground
acadia_2013_01_09_120001.jpg	3	snow_on_ground
acadia_2013_01_10_120001.jpg	3	snow_on_ground
acadia_2013_01_11_120001.jpg	3	snow_on_ground
acadia_2013_01_12_110001.jpg	3	snow_on_ground
acadia_2013_01_15_120001.jpg	3	snow_on_ground
acadia_2013_01_17_120001.jpg	3	snow_on_ground
acadia_2013_01_18_120001.jpg	3	snow_on_ground
acadia_2013_01_19_120001.jpg	3	snow_on_ground
acadia_2013_01_20_120001.jpg	3	snow_on_ground
acadia_2013_01_21_120001.jpg	3	snow_on_ground
acadia_2013_01_22_120001.jpg	3	snow_on_ground
acadia_2013_01_23_120001.jpg	3	snow_on_ground
acadia_2013_01_24_120001.jpg	3	snow_on_ground
acadia_2013_01_25_120001.jpg	3	snow_on_ground
acadia_2013_01_26_120001.jpg	3	snow_on_ground
acadia_2013_01_27_120001.jpg	3	snow_on_ground
acadia_2013_01_28_120001.jpg	3	snow_on_ground
acadia_2013_01_29_120001.jpg	3	snow_on_ground
acadia_2013_02_01_120001.jpg	0	no_snow
acadia_2013_02_02_120001.jpg	0	no_snow
acadia_2013_02_03_120001.jpg	3	snow_on_ground
acadia_2013_02_04_120002.jpg	3	snow_on_ground
acadia_2013_02_05_120001.jpg	3	snow_on_ground
acadia_2013_02_06_120002.jpg	2	snow_on_trees
acadia_2013_02_07_120001.jpg	3	snow_on_ground
acadia_2013_02_08_120001.jpg	3	snow_on_ground
acadia_2013_02_09_120001.jpg	2	snow_on_trees
acadia_2013_02_10_120001.jpg	3	snow_on_ground
acadia_2013_02_11_120001.jpg	2	snow_on_trees
acadia_2013_02_12_120001.jpg	3	snow_on_ground
acadia_2013_02_13_120001.jpg	2	snow_on_trees
acadia_2013_02_14_120001.jpg	3	snow_on_ground
acadia_2013_02_15_120001.jpg	3	snow_on_ground
acadia_2013_02_16_120001.jpg	3	snow_on_ground
acadia_2013_02_17_120001.jpg	2	snow_on_trees
acadia_2013_02_18_120001.jpg	3	snow_on_ground
acadia_2013_02_19_120001.jpg	3	snow_on_ground
acadia_2013_02_20_120001.jpg	3	snow_on_ground
acadia_2013_02_21_120001.jpg	3	snow_on_ground
acadia_2013_02_22_120001.jpg	3	snow_on_ground
acadia_2013_02_23_120001.jpg	3	snow_on_ground
acadia_2013_02_24_120001.jpg	0	no_snow
acadia_2013_02_25_120001.jpg	3	snow_on_ground
acadia_2013_02_26_120001.jpg	3	snow_on_ground
acadia_2013_02_27_120001.jpg	3	snow_on_ground
acadia_2013_03_02_120002.jpg	2	snow_on_trees
acadia_2013_03_03_120001.jpg	3	snow_on_ground
acadia_2013_03_05_120001.jpg	3	snow_on_ground
acadia_2013_03_07_120001.jpg	3	snow_on_ground
acadia_2013_03_10_120001.jpg	3	snow_on_ground
acadia_2013_03_11_120001.jpg	3	snow_on_ground
acadia_2013_03_12_120001.jpg	3	snow_on_ground
acadia_2013_03_13_120001.jpg	0	no_snow
acadia_2013_03_14_120001.jpg	0	no_snow
acadia_2013_03_15_120001.jpg	0	no_snow
acadia_2013_03_16_120001.jpg	0	no_snow
acadia_2013_03_17_120002.jpg	0	no_snow
acadia_2013_03_18_120001.jpg	0	no_snow
acadia_2013_03_23_130002.jpg	3	snow_on_ground
acadia_2013_03_24_120001.jpg	3	snow_on_ground
acadia_2013_03_25_110001.jpg	3	snow_on_ground
acadia_2013_03_26_120001.jpg	3	snow_on_ground
acadia_2013_03_27_120001.jpg	3	snow_on_ground
acadia_2013_03_28_120001.jpg	3	snow_on_ground
acadia_2013_03_29_120001.jpg	0	no_snow
acadia_2013_03_30_120001.jpg	0	no_snow
acadia_2013_03_31_120001.jpg	0	no_snow
acadia_2013_04_02_120001.jpg	0	no_snow
acadia_2013_04_03_120001.jpg	0	no_snow
acadia_2013_04_04_120001.jpg	0	no_snow
acadia_2013_04_05_120001.jpg	0	no_snow
acadia_2013_04_06_120001.jpg	0	no_snow
acadia_2013_04_07_120001.jpg	0	no_snow
acadia_2013_04_08_120001.jpg	0	no_snow
acadia_2013_04_10_120001.jpg	0	no_snow
acadia_2013_04_11_120001.jpg	0	no_snow
acadia_2013_04_12_120001.jpg	0	no_snow
acadia_2013_04_13_120001.jpg	0	no_snow
acadia_2013_04_14_120001.jpg	0	no_snow
acadia_2013_04_15_120001.jpg	0	no_snow
acadia_2013_04_16_120001.jpg	0	no_snow
acadia_2013_04_17_120001.jpg	0	no_snow
acadia_2013_04_18_120001.jpg	0	no_snow
acadia_2013_04_19_120001.jpg	0	no_snow
acadia_2013_04_22_130001.jpg	0	no_snow
acadia_2013_04_23_120002.jpg	0	no_snow
acadia_2013_04_25_120001.jpg	0	no_snow
acadia_2013_04_26_120001.jpg	0	no_snow
acadia_2013_04_27_120001.jpg	0	no_snow
acadia_2013_04_28_120001.jpg	0	no_snow
acadia_2013_04_29_120001.jpg	0	no_snow
acadia_2013_04_30_120001.jpg	0	no_snow
acadia_2013_05_01_120001.jpg	0	no_snow
acadia_2013_05_02_120001.jpg	0	no_snow
acadia_2013_05_03_120001.jpg	0	no_snow
acadia_2013_05_04_120001.jpg	0	no_snow
acadia_2013_05_05_120001.jpg	0	no_snow
acadia_2013_05_06_120001.jpg	0	no_snow
acadia_2013_05_07_120001.jpg	0	no_snow
acadia_2013_05_08_120001.jpg	0	no_snow
acadia_2013_05_10_120001.jpg	0	no_snow
acadia_2013_05_11_140001.jpg	0	no_snow
acadia_2013_05_13_120001.jpg	0	no_snow
acadia_2013_05_14_120001.jpg	0	no_snow
acadia_2013_05_15_140001.jpg	0	no_snow
acadia_2013_05_16_120001.jpg	0	no_snow
acadia_2013_05_17_120001.jpg	0	no_snow
acadia_2013_05_18_120001.jpg	0	no_snow
acadia_2013_05_19_120001.jpg	0	no_snow
acadia_2013_05_23_120001.jpg	0	no_snow
acadia_2013_05_24_120001.jpg	0	no_snow
acadia_2013_05_26_100002.jpg	0	no_snow
acadia_2013_05_27_120001.jpg	0	no_snow
acadia_2013_05_28_120001.jpg	0	no_snow
acadia_2013_05_30_120001.jpg	0	no_snow
acadia_2013_05_31_120001.jpg	0	no_snow
acadia_2013_06_01_120001.jpg	0	no_snow
acadia_2013_06_02_120001.jpg	0	no_snow
acadia_2013_06_03_130001.jpg	0	no_snow
acadia_2013_06_04_110001.jpg	0	no_snow
acadia_2013_06_05_140001.jpg	0	no_snow
acadia_2013_06_06_120001.jpg	0	no_snow
acadia_2013_06_07_120001.jpg	0	no_snow
acadia_2013_06_09_140001.jpg	0	no_snow
acadia_2013_06_10_120001.jpg	0	no_snow
acadia_2013_06_11_120001.jpg	0	no_snow
acadia_2013_06_13_120001.jpg	0	no_snow
acadia_2013_06_14_120001.jpg	0	no_snow
acadia_2013_06_15_120001.jpg	0	no_snow
acadia_2013_06_16_120001.jpg	0	no_snow
acadia_2013_06_17_120001.jpg	0	no_snow
acadia_2013_06_18_120001.jpg	0	no_snow
acadia_2013_06_19_120001.jpg	0	no_snow
acadia_2013_06_20_120001.jpg	0	no_snow
acadia_2013_06_21_120001.jpg	0	no_snow
acadia_2013_06_22_120001.jpg	0	no_snow
acadia_2013_06_23_120001.jpg	0	no_snow
acadia_2013_06_24_120001.jpg	0	no_snow
acadia_2013_06_25_120001.jpg	0	no_snow
acadia_2013_06_26_120001.jpg	0	no_snow
acadia_2013_06_27_120001.jpg	0	no_snow
acadia_2013_06_28_120001.jpg	0	no_snow
acadia_2013_06_29_120001.jpg	0	no_snow
acadia_2013_06_30_120001.jpg	0	no_snow
acadia_2013_07_01_120002.jpg	0	no_snow
acadia_2013_07_03_120001.jpg	0	no_snow
acadia_2013_07_04_120001.jpg	0	no_snow
acadia_2013_07_05_120001.jpg	0	no_snow
acadia_2013_07_08_120001.jpg	0	no_snow
acadia_2013_07_10_120001.jpg	0	no_snow
acadia_2013_07_11_120001.jpg	0	no_snow
acadia_2013_07_12_120001.jpg	0	no_snow
acadia_2013_07_13_120001.jpg	0	no_snow
acadia_2013_07_15_120001.jpg	0	no_snow
acadia_2013_07_16_120002.jpg	0	no_snow
acadia_2013_07_17_120001.jpg	0	no_snow
acadia_2013_07_18_120001.jpg	0	no_snow
acadia_2013_07_19_120001.jpg	0	no_snow
acadia_2013_07_20_150002.jpg	0	no_snow
acadia_2013_07_21_120001.jpg	0	no_snow
acadia_2013_07_22_120001.jpg	0	no_snow
acadia_2013_07_24_120001.jpg	0	no_snow
acadia_2013_07_25_120001.jpg	0	no_snow
acadia_2013_07_27_120001.jpg	0	no_snow
acadia_2013_07_28_120001.jpg	0	no_snow
acadia_2013_07_29_120001.jpg	0	no_snow
acadia_2013_07_30_120001.jpg	0	no_snow
acadia_2013_07_31_120001.jpg	0	no_snow
acadia_2013_08_01_120001.jpg	0	no_snow
acadia_2013_08_02_120001.jpg	0	no_snow
acadia_2013_08_05_120001.jpg	0	no_snow
acadia_2013_08_06_120001.jpg	0	no_snow
acadia_2013_08_07_120001.jpg	0	no_snow
acadia_2013_08_08_120002.jpg	0	no_snow
acadia_2013_08_09_120001.jpg	0	no_snow
acadia_2013_08_10_120001.jpg	0	no_snow
acadia_2013_08_11_120001.jpg	0	no_snow
acadia_2013_08_12_120001.jpg	0	no_snow
acadia_2013_08_13_120001.jpg	0	no_snow
acadia_2013_08_14_120001.jpg	0	no_snow
acadia_2013_08_15_120001.jpg	0	no_snow
acadia_2013_08_16_120001.jpg	0	no_snow
acadia_2013_08_17_120001.jpg	0	no_snow
acadia_2013_08_18_120001.jpg	0	no_snow
acadia_2013_08_19_120001.jpg	0	no_snow
acadia_2013_08_20_120001.jpg	0	no_snow
acadia_2013_08_21_120001.jpg	0	no_snow
acadia_2013_08_22_120001.jpg	0	no_snow
acadia_2013_08_23_120001.jpg	0	no_snow
acadia_2013_08_26_150001.jpg	0	no_snow
acadia_2013_08_27_120001.jpg	0	no_snow
acadia_2013_08_28_120001.jpg	0	no_snow
acadia_2013_08_29_120001.jpg	0	no_snow
acadia_2013_08_30_120001.jpg	0	no_snow
acadia_2013_08_31_120001.jpg	0	no_snow
acadia_2013_09_01_120001.jpg	0	no_snow
acadia_2013_09_03_120001.jpg	0	no_snow
acadia_2013_09_04_120001.jpg	0	no_snow
acadia_2013_09_05_120001.jpg	0	no_snow
acadia_2013_09_06_110001.jpg	0	no_snow
acadia_2013_09_07_120001.jpg	0	no_snow
acadia_2013_09_08_120001.jpg	0	no_snow
acadia_2013_09_09_120002.jpg	0	no_snow
acadia_2013_09_10_120001.jpg	0	no_snow
acadia_2013_09_19_160001.jpg	0	no_snow
acadia_2013_09_20_120001.jpg	0	no_snow
acadia_2013_09_22_120001.jpg	0	no_snow
acadia_2013_09_23_120001.jpg	0	no_snow
acadia_2013_09_24_120001.jpg	0	no_snow
acadia_2013_09_25_120001.jpg	0	no_snow
acadia_2013_09_26_120001.jpg	0	no_snow
acadia_2013_09_27_120001.jpg	0	no_snow
acadia_2013_09_28_120001.jpg	0	no_snow
acadia_2013_09_29_120001.jpg	0	no_snow
acadia_2013_09_30_120001.jpg	0	no_snow
acadia_2013_10_01_080001.jpg	0	no_snow
acadia_2013_10_17_120001.jpg	0	no_snow
acadia_2013_10_18_120001.jpg	0	no_snow
acadia_2013_10_19_120001.jpg	0	no_snow
acadia_2013_10_20_120001.jpg	0	no_snow
acadia_2013_10_21_110001.jpg	0	no_snow
acadia_2013_10_22_120001.jpg	0	no_snow
acadia_2013_10_23_120002.jpg	0	no_snow
acadia_2013_10_24_120001.jpg	0	no_snow
acadia_2013_10_25_120002.jpg	0	no_snow
acadia_2013_10_26_120001.jpg	0	no_snow
acadia_2013_10_27_120001.jpg	0	no_snow
acadia_2013_10_28_120001.jpg	0	no_snow
acadia_2013_10_29_120001.jpg	0	no_snow
acadia_2013_10_30_120001.jpg	0	no_snow
acadia_2013_10_31_120001.jpg	0	no_snow
acadia_2013_11_01_120001.jpg	0	no_snow
acadia_2013_11_02_120001.jpg	0	no_snow
acadia_2013_11_03_120001.jpg	0	no_snow
acadia_2013_11_04_120001.jpg	0	no_snow
acadia_2013_11_05_110001.jpg	0	no_snow
acadia_2013_11_06_120001.jpg	0	no_snow
acadia_2013_11_07_120001.jpg	0	no_snow
acadia_2013_11_08_120001.jpg	0	no_snow
acadia_2013_11_09_120001.jpg	0	no_snow
acadia_2013_11_10_120001.jpg	0	no_snow
acadia_2013_11_11_120001.jpg	0	no_snow
acadia_2013_11_12_110001.jpg	0	no_snow
acadia_2013_11_13_120001.jpg	0	no_snow
acadia_2013_11_14_110001.jpg	0	no_snow
acadia_2013_11_15_120002.jpg	0	no_snow
acadia_2013_11_16_120001.jpg	0	no_snow
acadia_2013_11_17_120001.jpg	0	no_snow
acadia_2013_11_19_120001.jpg	0	no_snow
acadia_2013_11_20_120001.jpg	0	no_snow
acadia_2013_11_21_120001.jpg	0	no_snow
acadia_2013_11_22_120001.jpg	0	no_snow
acadia_2013_11_23_120001.jpg	0	no_snow
acadia_2013_11_24_120001.jpg	0	no_snow
acadia_2013_11_25_120001.jpg	0	no_snow
acadia_2013_11_26_120001.jpg	0	no_snow
acadia_2013_11_27_120001.jpg	0	no_snow
acadia_2013_11_28_120001.jpg	0	no_snow
acadia_2013_11_29_120001.jpg	0	no_snow
acadia_2013_11_30_120001.jpg	0	no_snow
acadia_2013_12_01_120001.jpg	0	no_snow
acadia_2013_12_02_120002.jpg	0	no_snow
acadia_2013_12_04_120001.jpg	0	no_snow
acadia_2013_12_05_120001.jpg	0	no_snow
acadia_2013_12_06_120001.jpg	0	no_snow
acadia_2013_12_07_120001.jpg	0	no_snow
acadia_2013_12_08_120001.jpg	0	no_snow
acadia_2013_12_09_120001.jpg	0	no_snow
acadia_2013_12_11_120001.jpg	0	no_snow
acadia_2013_12_12_120001.jpg	0	no_snow
acadia_2013_12_13_120001.jpg	0	no_snow
[truncated: 170,928 more rows]
