# Supplementary material for: Integrating camera imagery, crowdsourcing, and deep learning to improve high-frequency automated monitoring of snow at continental-to-global scales
Source: PLoS One. 2018 Dec 27;13(12):e0209649. doi: 10.1371/journal.pone.0209649 (PMC6307743; doi:10.1371/journal.pone.0209649)
Supplement: S3 Table — See [33] to access the original images. (CSV) [file pone.0209649.s003.csv]

image	gold_standard	gold_standard_text
aguatibianorth_2004_07_23_120000.jpg	0	no_snow
aguatibianorth_2005_06_15_120000.jpg	0	no_snow
aguatibianorth_2005_06_21_120000.jpg	0	no_snow
aguatibianorth_2005_08_15_120000.jpg	0	no_snow
aguatibianorth_2005_09_14_120000.jpg	0	no_snow
aguatibianorth_2005_10_18_120000.jpg	0	no_snow
aguatibianorth_2006_02_03_120000.jpg	0	no_snow
aguatibianorth_2006_03_14_120000.jpg	0	no_snow
aguatibianorth_2006_04_11_120000.jpg	4	bad_image
aguatibianorth_2006_04_18_120000.jpg	4	bad_image
aguatibianorth_2006_07_09_120000.jpg	0	no_snow
aguatibianorth_2006_08_06_120000.jpg	0	no_snow
aguatibianorth_2006_09_07_120000.jpg	0	no_snow
ahwahnee_2009_12_08_120100.jpg	2	snow_on_trees
ahwahnee_2010_04_22_120000.jpg	0	no_snow
ahwahnee_2010_05_31_120000.jpg	0	no_snow
ahwahnee_2010_06_28_120000.jpg	0	no_snow
ahwahnee_2010_11_17_140000.jpg	0	no_snow
ahwahnee_2010_12_30_130000.jpg	2	snow_on_trees
ahwahnee_2011_06_28_120000.jpg	0	no_snow
ahwahnee_2011_08_03_120000.jpg	0	no_snow
ahwahnee_2011_09_16_120018.jpg	0	no_snow
ahwahnee_2012_12_14_120012.jpg	2	snow_on_trees
ahwahnee_2013_03_09_120019.jpg	0	no_snow
ahwahnee_2013_04_27_120008.jpg	0	no_snow
ahwahnee_2013_10_14_120025.jpg	0	no_snow
ahwahnee_2013_11_08_120004.jpg	0	no_snow
ahwahnee_2014_04_10_120004.jpg	0	no_snow
ahwahnee_2014_04_20_120003.jpg	0	no_snow
ahwahnee_2014_05_18_120008.jpg	0	no_snow
ahwahnee_2014_05_27_120003.jpg	0	no_snow
ahwahnee_2014_10_16_120004.jpg	0	no_snow
ahwahnee_2014_11_04_120003.jpg	0	no_snow
alligatorriver_2012_08_13_120108.jpg	0	no_snow
alligatorriver_2012_10_13_120110.jpg	0	no_snow
alligatorriver_2014_02_18_120110.jpg	0	no_snow
alligatorriver_2014_05_26_120108.jpg	0	no_snow
alligatorriver_2014_07_20_120111.jpg	0	no_snow
alligatorriver_2014_08_09_120108.jpg	0	no_snow
alligatorriver_2014_12_13_123109.jpg	0	no_snow
arbutuslake_2008_07_01_120217.jpg	0	no_snow
arbutuslake_2008_08_06_071003.jpg	0	no_snow
arbutuslake_2009_02_10_115117.jpg	3	snow_on_ground
arbutuslake_2009_04_05_120142.jpg	3	snow_on_ground
arbutuslake_2009_06_21_120141.jpg	0	no_snow
arbutuslake_2009_07_17_114542.jpg	0	no_snow
arbutuslake_2009_12_14_120141.jpg	2	snow_on_trees
arbutuslake_2010_05_25_120655.jpg	0	no_snow
arbutuslake_2010_10_23_120142.jpg	0	no_snow
arbutuslake_2010_10_25_120141.jpg	0	no_snow
arbutuslake_2011_04_06_120142.jpg	3	snow_on_ground
arbutuslake_2011_04_21_120142.jpg	3	snow_on_ground
arbutuslake_2011_04_24_120141.jpg	3	snow_on_ground
arbutuslake_2011_10_07_120139.jpg	0	no_snow
arbutuslake_2011_10_18_120137.jpg	0	no_snow
arbutuslake_2012_09_16_120133.jpg	0	no_snow
arbutuslake_2013_04_25_120133.jpg	0	no_snow
arbutuslake_2013_06_06_113134.jpg	0	no_snow
arbutuslake_2013_06_24_120135.jpg	0	no_snow
arbutuslake_2013_11_12_123134.jpg	3	snow_on_ground
arbutuslake_2014_05_13_120134.jpg	0	no_snow
arbutuslake_2014_07_26_120133.jpg	0	no_snow
armoklahoma_2011_09_19_113004.jpg	0	no_snow
armoklahoma_2012_09_09_122706.jpg	0	no_snow
armoklahoma_2012_10_16_122642.jpg	0	no_snow
asa_2010_11_07_120000.jpg	0	no_snow
asa_2012_03_03_120000.jpg	0	no_snow
asa_2012_03_20_120000.jpg	0	no_snow
asa_2012_04_09_120000.jpg	0	no_snow
asa_2012_04_14_120000.jpg	0	no_snow
asa_2013_04_05_120000.jpg	3	snow_on_ground
asa_2013_10_19_120000.jpg	0	no_snow
asa_2013_10_29_132600.jpg	0	no_snow
asa_2013_12_09_120000.jpg	3	snow_on_ground
asa_2013_12_15_120000.jpg	0	no_snow
ashburnham_2011_12_24_120104.jpg	0	no_snow
ashburnham_2012_10_20_120105.jpg	0	no_snow
ashburnham_2012_10_30_120102.jpg	0	no_snow
ashburnham_2013_03_26_120105.jpg	3	snow_on_ground
ashburnham_2013_04_10_120105.jpg	0	no_snow
ashburnham_2013_04_14_110103.jpg	0	no_snow
ashburnham_2014_01_22_120103.jpg	3	snow_on_ground
ashburnham_2014_01_31_120105.jpg	3	snow_on_ground
ashburnham_2014_05_13_120103.jpg	0	no_snow
ashburnham_2014_05_21_120105.jpg	0	no_snow
ashburnham_2014_06_19_120105.jpg	0	no_snow
ashburnham_2014_07_17_120105.jpg	0	no_snow
ashburnham_2014_09_17_120103.jpg	0	no_snow
barrocolorado_2013_09_24_120101.jpg	0	no_snow
barrocolorado_2014_11_13_120105.jpg	0	no_snow
barrow_2013_07_21_120121.jpg	0	no_snow
barrow_2013_10_13_113116.jpg	1	snow
barrow_2013_11_08_120118.jpg	1	snow
barrow_2013_11_13_120117.jpg	1	snow
barrow_2014_07_05_120003.jpg	0	no_snow
barrow_2014_09_25_120003.jpg	1	snow
barrow_2014_10_04_120003.jpg	1	snow
barrow_2014_12_05_120003.jpg	1	snow
bartlett_2005_10_10_122046.jpg	0	no_snow
bartlett_2005_10_17_122034.jpg	0	no_snow
bartlett_2006_01_04_124551.jpg	3	snow_on_ground
bartlett_2006_02_17_124531.jpg	3	snow_on_ground
bartlett_2006_03_12_120007.jpg	3	snow_on_ground
bartlett_2006_07_08_134456.jpg	0	no_snow
bartlett_2006_07_26_125810.jpg	0	no_snow
bartlett_2006_08_16_123509.jpg	0	no_snow
bartlett_2006_11_02_123542.jpg	0	no_snow
bartlett_2007_01_23_133604.jpg	3	snow_on_ground
bartlett_2007_05_27_122003.jpg	0	no_snow
bartlett_2007_10_03_123515.jpg	0	no_snow
bartlett_2007_11_29_121238.jpg	3	snow_on_ground
bartlett_2008_03_31_115851.jpg	2	snow_on_trees
bartlett_2008_09_10_115202.jpg	0	no_snow
bartlett_2009_02_04_121034.jpg	3	snow_on_ground
bartlett_2009_02_17_121035.jpg	3	snow_on_ground
bartlett_2009_02_18_121036.jpg	3	snow_on_ground
bartlett_2009_03_26_120032.jpg	3	snow_on_ground
bartlett_2009_09_08_120036.jpg	0	no_snow
bartlett_2009_11_30_120015.jpg	0	no_snow
bartlett_2010_02_01_115952.jpg	3	snow_on_ground
bartlett_2010_02_28_120018.jpg	2	snow_on_trees
bartlett_2010_03_02_120021.jpg	3	snow_on_ground
bartlett_2010_04_08_115958.jpg	0	no_snow
bartlett_2010_06_06_115905.jpg	0	no_snow
bartlett_2010_11_21_120033.jpg	0	no_snow
bartlett_2010_11_29_120029.jpg	3	snow_on_ground
bartlett_2011_01_25_121033.jpg	3	snow_on_ground
bartlett_2011_03_31_120041.jpg	3	snow_on_ground
bartlett_2011_04_08_120039.jpg	3	snow_on_ground
bartlett_2011_04_12_120033.jpg	3	snow_on_ground
bartlett_2011_05_31_120042.jpg	0	no_snow
bartlett_2011_06_06_120038.jpg	0	no_snow
bartlett_2011_10_31_120036.jpg	3	snow_on_ground
bartlett_2012_02_10_120034.jpg	3	snow_on_ground
bartlett_2012_02_20_120041.jpg	3	snow_on_ground
bartlett_2012_07_12_120038.jpg	0	no_snow
bartlett_2013_01_20_120037.jpg	3	snow_on_ground
bartlett_2013_12_31_121037.jpg	3	snow_on_ground
bartlett_2014_07_18_120044.jpg	0	no_snow
bartlett_2014_07_25_120053.jpg	0	no_snow
bartlettir_2009_07_14_123043.jpg	0	no_snow
bartlettir_2009_07_21_121041.jpg	0	no_snow
bartlettir_2009_12_06_121041.jpg	2	snow_on_trees
bartlettir_2009_12_08_124039.jpg	2	snow_on_trees
bartlettir_2010_02_07_121001.jpg	3	snow_on_ground
bartlettir_2010_02_25_121020.jpg	2	snow_on_trees
bartlettir_2010_10_15_121053.jpg	0	no_snow
bartlettir_2011_01_24_121040.jpg	3	snow_on_ground
bartlettir_2011_05_04_120145.jpg	0	no_snow
bartlettir_2011_05_09_120202.jpg	0	no_snow
bartlettir_2011_05_12_120147.jpg	0	no_snow
bartlettir_2011_12_20_120151.jpg	0	no_snow
bartlettir_2012_07_23_120207.jpg	0	no_snow
bartlettir_2012_08_30_120345.jpg	0	no_snow
bartlettir_2012_11_19_120146.jpg	0	no_snow
bartlettir_2012_12_22_120108.jpg	3	snow_on_ground
bartlettir_2013_02_09_120105.jpg	2	snow_on_trees
bartlettir_2013_04_13_120105.jpg	3	snow_on_ground
bartlettir_2014_04_09_120109.jpg	3	snow_on_ground
bartlettir_2014_05_30_120245.jpg	0	no_snow
bartlettir_2014_07_12_120115.jpg	0	no_snow
bartlettir_2014_09_04_120113.jpg	0	no_snow
bartlettir_2014_10_03_120108.jpg	0	no_snow
bartlettir_2014_12_22_120149.jpg	3	snow_on_ground
bitterootvalley_2002_11_24_120000.jpg	3	snow_on_ground
bitterootvalley_2003_05_04_120000.jpg	0	no_snow
bitterootvalley_2003_07_18_120000.jpg	0	no_snow
bitterootvalley_2003_10_03_120000.jpg	0	no_snow
bitterootvalley_2003_11_26_120000.jpg	2	snow_on_trees
bitterootvalley_2003_12_12_120000.jpg	2	snow_on_trees
bitterootvalley_2004_01_06_120000.jpg	2	snow_on_trees
bitterootvalley_2004_01_10_120000.jpg	4	bad_image
bitterootvalley_2004_02_20_120000.jpg	0	no_snow
bitterootvalley_2004_03_13_120000.jpg	0	no_snow
bitterootvalley_2004_09_13_120000.jpg	0	no_snow
bitterootvalley_2004_11_15_120000.jpg	0	no_snow
bitterootvalley_2004_11_26_120000.jpg	0	no_snow
bitterootvalley_2005_01_21_120000.jpg	0	no_snow
bitterootvalley_2005_05_17_120000.jpg	0	no_snow
bitterootvalley_2005_08_25_120000.jpg	0	no_snow
bitterootvalley_2006_05_24_120000.jpg	0	no_snow
bitterootvalley_2006_08_22_120000.jpg	0	no_snow
bitterootvalley_2006_08_31_120000.jpg	0	no_snow
bitterootvalley_2006_11_09_120000.jpg	0	no_snow
bitterootvalley_2007_01_29_120000.jpg	0	no_snow
bitterootvalley_2007_03_06_120000.jpg	0	no_snow
bitterootvalley_2008_06_14_120000.jpg	0	no_snow
bitterootvalley_2008_09_14_120100.jpg	0	no_snow
bitterootvalley_2008_10_27_120200.jpg	0	no_snow
bitterootvalley_2009_06_11_120000.jpg	0	no_snow
bitterootvalley_2009_09_20_050000.jpg	0	no_snow
bitterootvalley_2010_03_10_120000.jpg	0	no_snow
bitterootvalley_2010_05_27_090000.jpg	0	no_snow
bitterootvalley_2010_08_30_120100.jpg	0	no_snow
bitterootvalley_2011_01_24_120000.jpg	0	no_snow
bitterootvalley_2011_04_24_120000.jpg	0	no_snow
bitterootvalley_2011_06_20_120000.jpg	0	no_snow
bitterootvalley_2011_06_29_120000.jpg	0	no_snow
bitterootvalley_2011_07_18_120000.jpg	0	no_snow
bitterootvalley_2012_03_10_120029.jpg	0	no_snow
bitterootvalley_2012_04_18_120009.jpg	0	no_snow
bitterootvalley_2012_05_05_050005.jpg	4	bad_image
bitterootvalley_2012_06_27_120006.jpg	0	no_snow
bitterootvalley_2013_09_12_120014.jpg	0	no_snow
bitterootvalley_2013_12_05_120007.jpg	0	no_snow
bitterootvalley_2014_02_07_120011.jpg	2	snow_on_trees
bitterootvalley_2014_05_05_120005.jpg	0	no_snow
bitterootvalley_2014_08_29_120007.jpg	0	no_snow
bostoncommon_2010_08_20_115343.jpg	0	no_snow
bostoncommon_2011_02_10_115733.jpg	3	snow_on_ground
bostoncommon_2011_02_12_115745.jpg	3	snow_on_ground
bostoncommon_2011_08_01_120248.jpg	0	no_snow
bostoncommon_2011_11_01_120628.jpg	0	no_snow
bostoncommon_2011_11_09_120722.jpg	0	no_snow
bostoncommon_2012_04_07_115309.jpg	0	no_snow
bostoncommon_2012_08_12_120049.jpg	0	no_snow
bostoncommon_2012_09_27_115648.jpg	0	no_snow
bostoncommon_2013_06_04_120616.jpg	0	no_snow
bostoncommon_2014_02_25_120236.jpg	3	snow_on_ground
bostoncommon_2014_03_27_115637.jpg	0	no_snow
bostoncommon_2014_05_06_120111.jpg	0	no_snow
bostoncommon_2014_06_08_120503.jpg	0	no_snow
bostoncommon_2014_08_04_115645.jpg	0	no_snow
bostoncommon_2014_09_24_120251.jpg	0	no_snow
bostonu_2012_10_12_120106.jpg	0	no_snow
bostonu_2012_12_26_120105.jpg	0	no_snow
bostonu_2013_01_18_120105.jpg	0	no_snow
bostonu_2014_01_16_120105.jpg	0	no_snow
bostonu_2014_03_11_120104.jpg	0	no_snow
bostonu_2014_03_15_120104.jpg	0	no_snow
boundarywaters_2006_06_23_120000.jpg	0	no_snow
boundarywaters_2006_07_11_120000.jpg	0	no_snow
boundarywaters_2006_11_09_120000.jpg	0	no_snow
boundarywaters_2006_12_03_120000.jpg	2	snow_on_trees
boundarywaters_2006_12_13_120000.jpg	2	snow_on_trees
boundarywaters_2007_03_04_120000.jpg	2	snow_on_trees
boundarywaters_2007_04_23_120000.jpg	0	no_snow
boundarywaters_2007_05_04_120000.jpg	0	no_snow
boundarywaters_2008_01_18_120000.jpg	2	snow_on_trees
boundarywaters_2008_03_12_120000.jpg	3	snow_on_ground
boundarywaters_2008_05_10_120000.jpg	0	no_snow
boundarywaters_2008_08_29_120000.jpg	0	no_snow
boundarywaters_2008_10_01_120000.jpg	0	no_snow
boundarywaters_2008_12_06_120000.jpg	2	snow_on_trees
boundarywaters_2009_09_28_150100.jpg	0	no_snow
boundarywaters_2010_07_10_120000.jpg	0	no_snow
boundarywaters_2010_08_24_120000.jpg	0	no_snow
boundarywaters_2010_09_29_090000.jpg	0	no_snow
boundarywaters_2011_02_07_120000.jpg	2	snow_on_trees
boundarywaters_2011_05_30_120000.jpg	0	no_snow
boundarywaters_2012_04_27_120024.jpg	0	no_snow
boundarywaters_2012_11_16_120028.jpg	0	no_snow
boundarywaters_2013_01_04_120041.jpg	2	snow_on_trees
boundarywaters_2013_07_31_120012.jpg	0	no_snow
boundarywaters_2013_10_16_120052.jpg	0	no_snow
boundarywaters_2014_03_01_120031.jpg	2	snow_on_trees
boundarywaters_2014_07_08_120013.jpg	0	no_snow
bridger_2007_02_06_120000.jpg	3	snow_on_ground
bridger_2007_06_03_120000.jpg	0	no_snow
bridger_2007_08_20_120000.jpg	0	no_snow
bridger_2008_01_22_120000.jpg	2	snow_on_trees
bridger_2008_06_30_120000.jpg	0	no_snow
bridger_2008_09_04_120000.jpg	0	no_snow
bridger_2009_02_27_120000.jpg	2	snow_on_trees
bridger_2009_03_07_120000.jpg	3	snow_on_ground
bridger_2009_04_15_120000.jpg	3	snow_on_ground
bridger_2009_09_01_120100.jpg	0	no_snow
bridger_2009_10_25_120100.jpg	3	snow_on_ground
bridger_2010_04_04_120100.jpg	3	snow_on_ground
bridger_2011_01_13_120000.jpg	3	snow_on_ground
bridger_2013_01_12_120032.jpg	2	snow_on_trees
bridger_2013_02_10_120058.jpg	2	snow_on_trees
bridger_2013_11_01_120016.jpg	2	snow_on_trees
bullshoals_2014_03_11_120001.jpg	0	no_snow
burnssagebrush_2012_12_23_120111.jpg	1	snow
burnssagebrush_2012_12_27_120112.jpg	1	snow
burnssagebrush_2013_06_03_120122.jpg	0	no_snow
burnssagebrush_2013_06_07_120114.jpg	0	no_snow
burnssagebrush_2013_07_05_120113.jpg	0	no_snow
burnssagebrush_2013_09_22_070921.jpg	0	no_snow
burnssagebrush_2013_10_19_040922.jpg	4	bad_image
burnssagebrush_2014_02_19_120108.jpg	1	snow
burnssagebrush_2014_02_20_120108.jpg	1	snow
burnssagebrush_2014_05_02_120112.jpg	0	no_snow
burnssagebrush_2014_05_06_120107.jpg	0	no_snow
burnssagebrush_2014_09_02_120107.jpg	0	no_snow
burnssagebrush_2014_10_30_120108.jpg	0	no_snow
butte_2008_04_01_120033.jpg	0	no_snow
butte_2009_02_01_120032.jpg	3	snow_on_ground
butte_2009_11_26_120030.jpg	3	snow_on_ground
butte_2009_12_31_120032.jpg	3	snow_on_ground
butte_2010_04_26_100033.jpg	0	no_snow
butte_2010_05_23_120032.jpg	3	snow_on_ground
butte_2010_08_26_120033.jpg	0	no_snow
butte_2011_01_09_120032.jpg	3	snow_on_ground
butte_2011_06_17_120033.jpg	0	no_snow
butte_2011_06_29_120033.jpg	0	no_snow
butte_2011_07_26_120034.jpg	0	no_snow
butte_2011_08_10_120034.jpg	0	no_snow
butte_2011_11_27_120033.jpg	3	snow_on_ground
butte_2012_02_08_120032.jpg	3	snow_on_ground
butte_2012_06_18_120032.jpg	0	no_snow
butte_2012_07_16_112906.jpg	0	no_snow
butte_2012_08_13_120031.jpg	0	no_snow
butte_2012_09_04_114922.jpg	0	no_snow
butte_2013_01_22_120029.jpg	3	snow_on_ground
butte_2013_09_18_120032.jpg	0	no_snow
butte_2013_09_28_120045.jpg	3	snow_on_ground
butte_2013_12_08_120032.jpg	3	snow_on_ground
canadaOA_2011_12_04_120140.jpg	3	snow_on_ground
canadaOA_2012_06_22_120212.jpg	0	no_snow
canadaOA_2012_10_17_120137.jpg	0	no_snow
canadaOA_2012_12_27_120132.jpg	2	snow_on_trees
canadaOA_2013_08_17_120130.jpg	0	no_snow
canadaOA_2014_04_17_120208.jpg	3	snow_on_ground
canadaOA_2014_06_01_120150.jpg	0	no_snow
canadaOA_2014_08_10_120144.jpg	0	no_snow
canadaOA_2014_08_13_120108.jpg	0	no_snow
canadaOA_2014_08_29_113132.jpg	0	no_snow
canadaOA_2014_10_30_120132.jpg	2	snow_on_trees
canadaOBS_2011_07_26_120135.jpg	0	no_snow
canadaOBS_2012_02_16_133131.jpg	3	snow_on_ground
canadaOBS_2012_04_01_120126.jpg	3	snow_on_ground
canadaOBS_2012_04_11_120135.jpg	3	snow_on_ground
canadaOBS_2012_06_13_120128.jpg	0	no_snow
canadaOBS_2012_06_18_120132.jpg	0	no_snow
canadaOBS_2012_06_24_120126.jpg	0	no_snow
canadaOBS_2012_07_27_120129.jpg	0	no_snow
canadaOBS_2012_07_29_113125.jpg	0	no_snow
canadaOBS_2012_10_30_120129.jpg	2	snow_on_trees
canadaOBS_2012_11_25_120123.jpg	2	snow_on_trees
canadaOBS_2013_05_02_120129.jpg	3	snow_on_ground
canadaOBS_2014_03_27_120135.jpg	3	snow_on_ground
canadaOBS_2014_08_20_120152.jpg	0	no_snow
canadaOBS_2014_10_06_120133.jpg	0	no_snow
canadaOBS_2014_12_14_120135.jpg	3	snow_on_ground
caryinstitute_2008_08_02_115215.jpg	0	no_snow
caryinstitute_2009_02_03_121000.jpg	2	snow_on_trees
caryinstitute_2009_12_31_115622.jpg	2	snow_on_trees
caryinstitute_2010_02_19_115759.jpg	0	no_snow
caryinstitute_2010_07_17_120517.jpg	0	no_snow
caryinstitute_2010_09_04_111509.jpg	0	no_snow
caryinstitute_2010_09_30_080457.jpg	0	no_snow
caryinstitute_2011_02_02_114746.jpg	2	snow_on_trees
caryinstitute_2011_04_12_120608.jpg	0	no_snow
caryinstitute_2011_05_11_121445.jpg	0	no_snow
caryinstitute_2012_01_03_112117.jpg	0	no_snow
caryinstitute_2012_01_10_114728.jpg	0	no_snow
caryinstitute_2012_12_02_114832.jpg	0	no_snow
caryinstitute_2013_02_10_115113.jpg	2	snow_on_trees
caryinstitute_2013_03_24_115252.jpg	0	no_snow
caryinstitute_2013_06_10_114725.jpg	0	no_snow
caryinstitute_2013_09_14_120530.jpg	0	no_snow
caryinstitute_2014_01_22_114546.jpg	3	snow_on_ground
caryinstitute_2014_03_22_114625.jpg	0	no_snow
caryinstitute_2014_05_02_120032.jpg	0	no_snow
caryinstitute_2014_06_06_115219.jpg	0	no_snow
caryinstitute_2014_07_24_122222.jpg	0	no_snow
cedarcreek_2010_02_16_121700.jpg	3	snow_on_ground
cedarcreek_2010_05_21_120700.jpg	0	no_snow
cedarcreek_2010_07_30_120500.jpg	0	no_snow
chibougamau_2008_05_09_120138.jpg	3	snow_on_ground
chibougamau_2009_04_01_130137.jpg	3	snow_on_ground
chibougamau_2010_12_29_113137.jpg	2	snow_on_trees
chibougamau_2011_05_01_120138.jpg	3	snow_on_ground
coaloilpoint_2008_08_17_120000.jpg	0	no_snow
coaloilpoint_2008_08_24_120000.jpg	0	no_snow
coaloilpoint_2009_01_14_120000.jpg	0	no_snow
coaloilpoint_2009_01_24_120000.jpg	0	no_snow
coaloilpoint_2009_04_23_120000.jpg	0	no_snow
coaloilpoint_2010_06_27_120000.jpg	0	no_snow
coaloilpoint_2010_10_04_120000.jpg	0	no_snow
coaloilpoint_2010_11_10_120000.jpg	0	no_snow
coaloilpoint_2011_04_03_120000.jpg	0	no_snow
coaloilpoint_2011_04_11_120000.jpg	0	no_snow
coaloilpoint_2011_06_10_120000.jpg	0	no_snow
coaloilpoint_2011_09_13_120000.jpg	0	no_snow
coaloilpoint_2011_10_04_120000.jpg	0	no_snow
coaloilpoint_2012_05_21_120000.jpg	0	no_snow
coaloilpoint_2012_09_16_120000.jpg	0	no_snow
contactcreek_2010_09_27_120000.jpg	0	no_snow
contactcreek_2010_10_02_120000.jpg	0	no_snow
contactcreek_2010_12_22_120104.jpg	1	snow
contactcreek_2011_08_07_120502.jpg	0	no_snow
contactcreek_2011_08_25_120502.jpg	0	no_snow
contactcreek_2011_10_25_120605.jpg	4	bad_image
contactcreek_2011_11_24_120706.jpg	4	bad_image
contactcreek_2012_01_20_120708.jpg	4	bad_image
contactcreek_2012_02_06_120709.jpg	1	snow
contactcreek_2012_03_02_120810.jpg	1	snow
contactcreek_2012_03_10_120810.jpg	1	snow
contactcreek_2012_03_29_120811.jpg	1	snow
contactcreek_2012_09_24_121137.jpg	0	no_snow
contactcreek_2012_10_05_121149.jpg	0	no_snow
contactcreek_2012_10_25_121209.jpg	1	snow
contactcreek_2013_02_24_121342.jpg	1	snow
contactcreek_2013_06_08_121522.jpg	0	no_snow
contactcreek_2013_12_04_120329.jpg	1	snow
coville_2010_12_16_120104.jpg	1	snow
coville_2011_07_26_120901.jpg	0	no_snow
coville_2012_01_02_121108.jpg	4	bad_image
coville_2012_01_07_121108.jpg	1	snow
coville_2013_02_18_122359.jpg	1	snow
coville_2013_08_30_113132.jpg	0	no_snow
coville_2013_12_06_113256.jpg	0	no_snow
coweeta_2011_05_14_120135.jpg	0	no_snow
coweeta_2011_05_23_113133.jpg	0	no_snow
coweeta_2011_11_07_120134.jpg	0	no_snow
coweeta_2012_09_25_120133.jpg	0	no_snow
coweeta_2012_11_27_120134.jpg	0	no_snow
coweeta_2013_01_08_120132.jpg	0	no_snow
coweeta_2013_01_19_120133.jpg	0	no_snow
coweeta_2013_12_19_120135.jpg	0	no_snow
coweeta_2014_02_02_120134.jpg	0	no_snow
coweeta_2014_06_15_120134.jpg	0	no_snow
dollysods_2004_01_07_120000.jpg	4	bad_image
dollysods_2004_01_14_120000.jpg	2	snow_on_trees
dollysods_2004_10_08_120000.jpg	0	no_snow
dollysods_2005_01_23_120000.jpg	2	snow_on_trees
dollysods_2005_06_06_120000.jpg	0	no_snow
dollysods_2006_01_20_120000.jpg	3	snow_on_ground
dollysods_2006_02_09_120000.jpg	3	snow_on_ground
dollysods_2006_03_17_120000.jpg	2	snow_on_trees
dollysods_2006_06_08_120000.jpg	0	no_snow
dollysods_2007_04_04_120000.jpg	0	no_snow
dollysods_2007_09_15_120000.jpg	0	no_snow
dollysods_2007_10_28_120000.jpg	0	no_snow
dollysods_2007_11_01_120000.jpg	4	bad_image
dollysods_2007_11_29_120000.jpg	0	no_snow
dollysods_2008_02_08_120000.jpg	0	no_snow
dollysods_2008_02_13_120000.jpg	4	bad_image
dollysods_2008_09_15_120000.jpg	0	no_snow
dollysods_2008_10_12_120000.jpg	0	no_snow
dollysods_2008_11_06_120000.jpg	0	no_snow
dollysods_2009_02_02_120000.jpg	3	snow_on_ground
dollysods_2009_11_21_120100.jpg	0	no_snow
dollysods_2009_11_22_120100.jpg	0	no_snow
dollysods_2010_07_11_120000.jpg	0	no_snow
dollysods_2010_10_09_120100.jpg	0	no_snow
dollysods_2010_11_27_120100.jpg	4	bad_image
dollysods_2011_10_23_120033.jpg	0	no_snow
dollysods_2011_10_29_120039.jpg	2	snow_on_trees
dollysods_2012_04_12_120100.jpg	0	no_snow
dollysods_2012_05_16_120029.jpg	0	no_snow
dollysods_2012_05_24_120047.jpg	0	no_snow
dollysods_2012_06_05_120031.jpg	0	no_snow
dollysods_2012_06_21_120237.jpg	0	no_snow
dollysods_2012_09_05_120026.jpg	0	no_snow
dollysods_2013_12_09_120029.jpg	4	bad_image
dollysods_2014_09_20_120024.jpg	0	no_snow
downerwoods_2014_02_17_113922.jpg	3	snow_on_ground
downerwoods_2014_03_02_113104.jpg	3	snow_on_ground
downerwoods_2014_03_09_123103.jpg	3	snow_on_ground
downerwoods_2014_03_19_113103.jpg	3	snow_on_ground
downerwoods_2014_08_03_113102.jpg	0	no_snow
downerwoods_2014_08_23_113103.jpg	0	no_snow
downerwoods_2014_11_01_113103.jpg	0	no_snow
dukehw_2014_09_20_120109.jpg	0	no_snow
exglsnotel_2013_11_14_120138.jpg	3	snow_on_ground
exglsnotel_2014_01_20_120141.jpg	3	snow_on_ground
exglsnotel_2014_03_26_120139.jpg	3	snow_on_ground
exglsnotel_2014_08_22_120143.jpg	0	no_snow
exglsnotel_2014_09_01_120143.jpg	0	no_snow
exglsnotel_2014_09_20_120139.jpg	0	no_snow
freemangrass_2012_05_27_120112.jpg	0	no_snow
freemangrass_2012_10_29_120107.jpg	0	no_snow
freemangrass_2012_11_06_120106.jpg	0	no_snow
freemangrass_2013_03_31_120105.jpg	0	no_snow
freemangrass_2013_04_17_120107.jpg	0	no_snow
freemangrass_2013_05_03_120106.jpg	0	no_snow
freemangrass_2013_07_08_120105.jpg	0	no_snow
freemangrass_2013_12_03_120107.jpg	0	no_snow
freemangrass_2014_01_06_120105.jpg	0	no_snow
freemanwood_2012_09_04_120111.jpg	0	no_snow
freemanwood_2012_09_23_120111.jpg	0	no_snow
freemanwood_2013_01_19_120106.jpg	0	no_snow
freemanwood_2013_02_24_120110.jpg	0	no_snow
freemanwood_2013_03_02_120105.jpg	0	no_snow
freemanwood_2013_03_21_120107.jpg	0	no_snow
freemanwood_2013_05_21_120111.jpg	0	no_snow
freemanwood_2013_08_17_120107.jpg	0	no_snow
freemanwood_2014_02_12_130146.jpg	0	no_snow
gcesapelo_2014_02_11_120002.jpg	0	no_snow
gcesapelo_2014_02_15_120002.jpg	0	no_snow
gcesapelo_2014_02_17_120002.jpg	0	no_snow
gcesapelo_2014_06_03_120002.jpg	0	no_snow
gcesapelo_2014_11_25_120002.jpg	0	no_snow
gcesapelo_2014_12_15_120002.jpg	0	no_snow
grandcanyon_2001_12_01_120000.jpg	1	snow
grandcanyon_2001_12_03_120000.jpg	0	no_snow
grandcanyon_2002_05_13_120000.jpg	0	no_snow
grandcanyon_2002_05_17_120000.jpg	0	no_snow
grandcanyon_2002_09_01_120000.jpg	0	no_snow
grandcanyon_2002_10_02_120000.jpg	0	no_snow
grandcanyon_2002_11_23_120000.jpg	0	no_snow
grandcanyon_2003_12_16_120000.jpg	0	no_snow
grandcanyon_2004_03_19_120000.jpg	0	no_snow
grandcanyon_2004_06_02_120000.jpg	0	no_snow
grandcanyon_2004_07_27_120000.jpg	0	no_snow
grandcanyon_2005_04_08_120000.jpg	0	no_snow
grandcanyon_2005_04_24_120000.jpg	4	bad_image
grandcanyon_2006_07_05_120000.jpg	0	no_snow
grandcanyon_2006_07_22_120000.jpg	0	no_snow
grandcanyon_2007_10_22_120000.jpg	0	no_snow
grandcanyon_2008_03_14_120000.jpg	0	no_snow
grandcanyon_2008_05_29_120000.jpg	0	no_snow
grandcanyon_2008_06_02_120000.jpg	0	no_snow
grandcanyon_2008_06_28_120000.jpg	0	no_snow
grandcanyon_2008_07_31_120000.jpg	0	no_snow
grandcanyon_2008_08_22_120000.jpg	0	no_snow
grandcanyon_2008_10_04_121300.jpg	4	bad_image
grandcanyon_2009_01_09_121100.jpg	1	snow
grandcanyon_2009_06_22_110100.jpg	0	no_snow
grandcanyon_2009_11_20_120200.jpg	0	no_snow
grandcanyon_2010_01_04_120400.jpg	1	snow
grandcanyon_2010_02_28_120100.jpg	4	bad_image
grandcanyon_2010_08_03_130000.jpg	0	no_snow
grandcanyon_2011_11_01_120048.jpg	0	no_snow
grandcanyon_2011_11_02_120045.jpg	0	no_snow
grandcanyon_2012_04_21_120053.jpg	0	no_snow
grandcanyon_2012_05_16_110052.jpg	0	no_snow
grandcanyon_2012_12_05_120105.jpg	0	no_snow
grandcanyon_2012_12_23_120146.jpg	0	no_snow
grandcanyon_2013_05_27_120121.jpg	0	no_snow
grandcanyon_2013_10_24_120051.jpg	0	no_snow
grandcanyon_2013_11_01_120032.jpg	0	no_snow
grandcanyon_2014_06_27_120034.jpg	0	no_snow
groundhog_2008_12_18_113139.jpg	2	snow_on_trees
groundhog_2008_12_19_113140.jpg	2	snow_on_trees
groundhog_2009_02_05_123136.jpg	2	snow_on_trees
groundhog_2009_03_09_120136.jpg	3	snow_on_ground
groundhog_2009_04_26_113134.jpg	3	snow_on_ground
groundhog_2009_10_15_113135.jpg	0	no_snow
groundhog_2009_12_04_120136.jpg	2	snow_on_trees
groundhog_2009_12_05_113137.jpg	2	snow_on_trees
groundhog_2010_04_10_120140.jpg	2	snow_on_trees
groundhog_2010_11_20_113140.jpg	3	snow_on_ground
groundhog_2010_12_24_183136.jpg	4	bad_image
groundhog_2011_02_02_110139.jpg	2	snow_on_trees
groundhog_2011_04_16_113137.jpg	3	snow_on_ground
groundhog_2011_11_10_153135.jpg	0	no_snow
groundhog_2012_04_24_115857.jpg	2	snow_on_trees
groundhog_2012_10_25_113136.jpg	0	no_snow
groundhog_2012_11_14_113134.jpg	2	snow_on_trees
groundhog_2013_01_27_113137.jpg	2	snow_on_trees
groundhog_2013_02_01_113137.jpg	2	snow_on_trees
groundhog_2013_04_16_113139.jpg	3	snow_on_ground
groundhog_2013_07_27_113137.jpg	0	no_snow
groundhog_2013_10_30_113138.jpg	2	snow_on_trees
harvard_2008_05_08_120139.jpg	0	no_snow
harvard_2008_11_02_120137.jpg	0	no_snow
harvard_2009_01_22_120136.jpg	2	snow_on_trees
harvard_2009_02_16_120138.jpg	3	snow_on_ground
harvard_2009_06_11_120137.jpg	0	no_snow
harvard_2009_06_27_120138.jpg	0	no_snow
harvard_2010_01_07_120136.jpg	2	snow_on_trees
harvard_2010_04_07_120138.jpg	0	no_snow
harvard_2010_05_27_120138.jpg	0	no_snow
harvard_2010_06_24_120139.jpg	0	no_snow
harvard_2010_08_16_120137.jpg	0	no_snow
harvard_2011_03_01_120136.jpg	2	snow_on_trees
harvard_2011_07_23_120139.jpg	0	no_snow
harvard_2011_09_05_120137.jpg	0	no_snow
harvard_2011_09_18_120138.jpg	0	no_snow
harvard_2012_01_03_120033.jpg	0	no_snow
harvard_2012_06_23_120139.jpg	0	no_snow
harvard_2012_09_12_120137.jpg	0	no_snow
harvard_2013_01_04_120210.jpg	2	snow_on_trees
harvard_2013_05_06_115034.jpg	0	no_snow
harvard_2013_05_24_120137.jpg	0	no_snow
harvard_2014_06_19_120138.jpg	0	no_snow
harvard_2014_06_20_123138.jpg	0	no_snow
harvardbarn_2011_09_12_120104.jpg	0	no_snow
harvardbarn_2011_12_05_120104.jpg	0	no_snow
harvardbarn_2011_12_17_120103.jpg	0	no_snow
harvardbarn_2011_12_18_120104.jpg	0	no_snow
harvardbarn_2011_12_28_120102.jpg	0	no_snow
harvardbarn_2012_03_21_120108.jpg	0	no_snow
harvardbarn_2012_07_04_064606.jpg	0	no_snow
harvardbarn_2012_11_06_120104.jpg	0	no_snow
harvardbarn_2012_12_15_120104.jpg	0	no_snow
harvardbarn_2013_02_11_120104.jpg	3	snow_on_ground
harvardbarn_2013_05_12_120103.jpg	0	no_snow
harvardbarn_2014_07_03_120304.jpg	0	no_snow
harvardbarn_2014_09_09_120304.jpg	0	no_snow
harvardbarn_2014_10_16_120104.jpg	0	no_snow
harvardbarn2_2012_10_27_120103.jpg	0	no_snow
harvardbarn2_2013_01_24_120104.jpg	3	snow_on_ground
harvardbarn2_2013_02_18_120103.jpg	3	snow_on_ground
harvardbarn2_2013_03_27_114602.jpg	3	snow_on_ground
harvardbarn2_2013_03_28_120108.jpg	3	snow_on_ground
harvardbarn2_2013_04_11_120104.jpg	0	no_snow
harvardbarn2_2013_04_12_120115.jpg	3	snow_on_ground
harvardbarn2_2013_07_16_120124.jpg	0	no_snow
harvardbarn2_2013_08_28_114607.jpg	0	no_snow
harvardbarn2_2013_12_28_120116.jpg	3	snow_on_ground
harvardbarn2_2014_04_09_120105.jpg	0	no_snow
harvardbarn2_2014_07_02_120303.jpg	0	no_snow
harvardbarn2_2014_12_16_120108.jpg	3	snow_on_ground
harvardbarn2_2014_12_20_120303.jpg	3	snow_on_ground
harvardblo_2009_04_12_120143.jpg	0	no_snow
harvardblo_2009_10_03_120143.jpg	0	no_snow
harvardblo_2009_12_14_120142.jpg	3	snow_on_ground
harvardblo_2009_12_15_120142.jpg	3	snow_on_ground
harvardblo_2009_12_28_120142.jpg	2	snow_on_trees
harvardblo_2010_01_10_120142.jpg	2	snow_on_trees
harvardblo_2010_09_10_114159.jpg	0	no_snow
harvardblo_2011_02_06_120142.jpg	3	snow_on_ground
harvardblo_2011_03_08_120142.jpg	3	snow_on_ground
harvardblo_2011_03_28_120142.jpg	3	snow_on_ground
harvardblo_2011_04_01_120143.jpg	2	snow_on_trees
harvardblo_2011_10_21_120142.jpg	0	no_snow
harvardblo_2011_12_10_120142.jpg	3	snow_on_ground
harvardblo_2012_02_05_120142.jpg	3	snow_on_ground
harvardblo_2012_04_01_120141.jpg	0	no_snow
harvardblo_2012_04_13_120140.jpg	0	no_snow
harvardblo_2012_05_17_120143.jpg	0	no_snow
harvardblo_2013_01_07_120143.jpg	2	snow_on_trees
harvardblo_2013_03_08_120141.jpg	2	snow_on_trees
harvardblo_2013_05_04_120143.jpg	0	no_snow
harvardblo_2013_06_02_113140.jpg	0	no_snow
harvardblo_2013_08_13_113140.jpg	0	no_snow
harvardblo_2014_04_03_120141.jpg	3	snow_on_ground
harvardblo_2014_07_03_120142.jpg	0	no_snow
harvardblo_2014_10_04_120143.jpg	0	no_snow
harvardhemlock_2011_04_27_120145.jpg	0	no_snow
harvardhemlock_2011_10_31_164347.jpg	2	snow_on_trees
harvardhemlock_2012_01_25_120142.jpg	0	no_snow
harvardhemlock_2013_02_15_113143.jpg	0	no_snow
harvardhemlock_2013_02_25_120143.jpg	2	snow_on_trees
harvardhemlock_2013_09_02_120143.jpg	0	no_snow
harvardhemlock_2013_10_09_120144.jpg	0	no_snow
harvardhemlock_2013_12_31_120143.jpg	0	no_snow
harvardhemlock_2014_01_20_120144.jpg	2	snow_on_trees
harvardhemlock_2014_03_19_120144.jpg	0	no_snow
harvardhemlock_2014_06_09_120143.jpg	0	no_snow
harvardhemlock_2014_08_08_120144.jpg	0	no_snow
harvardhemlock_2014_09_29_120145.jpg	0	no_snow
harvardlph_2010_07_07_120142.jpg	0	no_snow
harvardlph_2010_09_11_120144.jpg	0	no_snow
harvardlph_2010_10_21_120145.jpg	0	no_snow
harvardlph_2011_04_13_120144.jpg	0	no_snow
harvardlph_2011_11_03_114332.jpg	3	snow_on_ground
harvardlph_2011_11_04_114330.jpg	3	snow_on_ground
harvardlph_2012_01_25_114034.jpg	3	snow_on_ground
harvardlph_2012_07_02_113634.jpg	0	no_snow
harvardlph_2013_07_21_115303.jpg	0	no_snow
harvardlph_2013_12_26_115921.jpg	2	snow_on_trees
harvardlph_2014_01_09_114741.jpg	0	no_snow
harvardlph_2014_04_20_113004.jpg	0	no_snow
harvardlph_2014_05_10_112926.jpg	0	no_snow
harvardlph_2014_11_20_120004.jpg	0	no_snow
harvardlph_2014_12_30_120004.jpg	0	no_snow
howland1_2007_06_15_120100.jpg	0	no_snow
howland1_2008_04_06_120149.jpg	0	no_snow
howland1_2008_07_28_120144.jpg	0	no_snow
howland1_2008_07_29_120144.jpg	0	no_snow
howland1_2008_10_01_120145.jpg	0	no_snow
howland1_2008_11_30_120144.jpg	0	no_snow
howland1_2008_12_17_120143.jpg	2	snow_on_trees
howland1_2009_09_10_120147.jpg	0	no_snow
howland1_2009_09_13_120328.jpg	0	no_snow
howland1_2009_09_26_120144.jpg	0	no_snow
howland1_2009_10_03_120145.jpg	0	no_snow
howland1_2009_12_19_120144.jpg	2	snow_on_trees
howland1_2010_01_17_120148.jpg	0	no_snow
howland1_2010_06_26_120143.jpg	0	no_snow
howland1_2010_10_29_120143.jpg	0	no_snow
howland1_2011_01_20_113140.jpg	2	snow_on_trees
howland1_2012_06_29_120144.jpg	0	no_snow
howland1_2012_08_19_120143.jpg	0	no_snow
howland1_2012_10_01_113141.jpg	0	no_snow
howland1_2013_08_31_120143.jpg	0	no_snow
howland1_2013_11_04_120144.jpg	0	no_snow
howland1_2014_06_24_120145.jpg	0	no_snow
howland2_2011_04_29_123133.jpg	0	no_snow
howland2_2011_05_04_123137.jpg	0	no_snow
howland2_2011_08_01_123136.jpg	0	no_snow
howland2_2013_02_01_120133.jpg	3	snow_on_ground
howland2_2013_06_17_123136.jpg	0	no_snow
howland2_2013_07_01_123134.jpg	0	no_snow
howland2_2014_06_09_120004.jpg	0	no_snow
howland2_2014_07_03_120004.jpg	0	no_snow
howland2_2014_08_18_120003.jpg	0	no_snow
hubbardbrook_2009_04_29_103137.jpg	0	no_snow
hubbardbrook_2009_05_03_120137.jpg	0	no_snow
hubbardbrook_2009_12_20_080137.jpg	3	snow_on_ground
hubbardbrook_2010_04_27_103137.jpg	0	no_snow
hubbardbrook_2010_07_27_120140.jpg	0	no_snow
hubbardbrook_2010_08_18_120139.jpg	0	no_snow
hubbardbrook_2010_09_04_120137.jpg	0	no_snow
hubbardbrook_2011_05_01_120134.jpg	0	no_snow
hubbardbrook_2011_06_03_113132.jpg	0	no_snow
hubbardbrook_2011_06_29_120135.jpg	0	no_snow
hubbardbrook_2012_03_30_120135.jpg	0	no_snow
hubbardbrook_2012_08_22_120134.jpg	0	no_snow
hubbardbrook_2012_10_25_120133.jpg	0	no_snow
hubbardbrook_2012_11_06_120133.jpg	0	no_snow
hubbardbrook_2012_11_24_120135.jpg	0	no_snow
hubbardbrook_2012_11_26_120135.jpg	0	no_snow
hubbardbrook_2012_12_28_120134.jpg	3	snow_on_ground
hubbardbrook_2013_01_03_120134.jpg	3	snow_on_ground
hubbardbrook_2013_03_05_120134.jpg	3	snow_on_ground
hubbardbrook_2013_03_26_120134.jpg	3	snow_on_ground
hubbardbrook_2013_04_26_120134.jpg	0	no_snow
hubbardbrook_2014_03_31_120134.jpg	3	snow_on_ground
hubbardbrook_2014_11_23_120134.jpg	0	no_snow
hubbardbrookml_2012_03_20_120700.jpg	3	snow_on_ground
hubbardbrookml_2012_04_03_120700.jpg	0	no_snow
hubbardbrookml_2012_08_07_121002.jpg	0	no_snow
hubbardbrookml_2012_08_13_121000.jpg	0	no_snow
hubbardbrookml_2013_01_23_121500.jpg	2	snow_on_trees
hubbardbrookml_2013_04_02_121500.jpg	3	snow_on_ground
hubbardbrookml_2013_04_11_121500.jpg	0	no_snow
hubbardbrookml_2013_11_08_120502.jpg	0	no_snow
hubbardbrookml_2013_12_10_120502.jpg	2	snow_on_trees
hubbardbrooknfws_2012_11_27_121504.jpg	0	no_snow
hubbardbrooknfws_2013_03_02_121504.jpg	2	snow_on_trees
hubbardbrooknfws_2013_06_16_131504.jpg	0	no_snow
hubbardbrooknfws_2013_07_16_121504.jpg	0	no_snow
hubbardbrooknfws_2014_01_06_121502.jpg	4	bad_image
hubbardbrooknfws_2014_05_01_110602.jpg	4	bad_image
hubbardbrooksfws_2012_04_25_121000.jpg	0	no_snow
hubbardbrooksfws_2012_09_14_121202.jpg	0	no_snow
hubbardbrooksfws_2013_01_30_111500.jpg	2	snow_on_trees
hubbardbrooksfws_2013_08_21_120502.jpg	0	no_snow
hubbardbrooksfws_2013_11_16_120502.jpg	0	no_snow
hubbardbrooksfws_2013_12_12_120502.jpg	2	snow_on_trees
hubbardbrooksfws_2013_12_18_120502.jpg	2	snow_on_trees
hubbardbrooksfws_2013_12_21_120502.jpg	3	snow_on_ground
hubbardbrooksfws_2013_12_23_120500.jpg	3	snow_on_ground
hubbardbrooksfws_2013_12_30_120500.jpg	2	snow_on_trees
ibp_2013_08_08_120106.jpg	0	no_snow
ibp_2014_04_02_120004.jpg	0	no_snow
ibp_2014_09_17_120007.jpg	0	no_snow
imcrkfen_2012_06_09_120607.jpg	0	no_snow
imcrkfen_2012_06_12_110608.jpg	0	no_snow
imcrkfen_2012_07_14_120605.jpg	0	no_snow
imcrkfen_2012_07_19_120608.jpg	0	no_snow
imcrkfen_2012_09_13_120606.jpg	1	snow
imcrkfen_2012_09_14_120606.jpg	1	snow
imcrkfen_2012_09_27_120608.jpg	1	snow
imcrkfen_2012_11_09_120606.jpg	1	snow
imcrkfen_2012_11_16_120606.jpg	4	bad_image
imcrkfen_2012_12_05_120606.jpg	4	bad_image
imcrkfen_2013_03_16_120608.jpg	1	snow
imcrkfen_2013_04_02_120612.jpg	1	snow
imcrkfen_2013_05_25_120606.jpg	1	snow
imcrkfen_2013_06_25_120606.jpg	0	no_snow
imcrkfen_2013_06_28_120605.jpg	0	no_snow
imcrkfen_2013_07_06_120607.jpg	0	no_snow
imcrkfen_2013_07_30_120606.jpg	0	no_snow
imcrkfen_2013_08_29_120605.jpg	0	no_snow
imcrkfen_2013_10_19_120609.jpg	1	snow
imcrkfen_2013_10_20_120605.jpg	1	snow
imcrkfen_2013_12_23_110607.jpg	4	bad_image
imcrkfen_2014_03_04_120609.jpg	4	bad_image
imcrkfen_2014_05_19_120607.jpg	1	snow
imcrkfen_2014_06_14_120610.jpg	0	no_snow
imcrkfen_2014_07_05_120608.jpg	0	no_snow
imcrkfen_2014_08_29_120607.jpg	4	bad_image
imcrkfen_2014_11_14_120608.jpg	1	snow
imcrkridge0_2012_08_31_120610.jpg	0	no_snow
imcrkridge0_2012_09_05_120609.jpg	0	no_snow
imcrkridge0_2012_10_20_120605.jpg	1	snow
imcrkridge0_2012_11_05_120612.jpg	1	snow
imcrkridge0_2012_11_06_120608.jpg	1	snow
imcrkridge0_2012_11_23_120609.jpg	1	snow
imcrkridge0_2013_03_17_170609.jpg	1	snow
imcrkridge0_2013_03_31_120612.jpg	1	snow
imcrkridge0_2013_05_01_120606.jpg	1	snow
imcrkridge0_2013_05_13_120608.jpg	1	snow
imcrkridge0_2013_06_08_120609.jpg	1	snow
imcrkridge0_2013_06_30_120606.jpg	0	no_snow
imcrkridge0_2013_07_02_120609.jpg	0	no_snow
imcrkridge0_2013_07_23_120606.jpg	0	no_snow
imcrkridge0_2014_06_24_120606.jpg	0	no_snow
imcrkridge0_2014_11_11_120605.jpg	1	snow
imcrkridge1_2012_06_22_110613.jpg	0	no_snow
imcrkridge1_2012_09_19_120606.jpg	0	no_snow
imcrkridge1_2012_09_21_120608.jpg	1	snow
imcrkridge1_2012_10_31_120615.jpg	4	bad_image
imcrkridge1_2012_11_01_120610.jpg	1	snow
imcrkridge1_2013_03_17_170606.jpg	1	snow
imcrkridge1_2013_04_30_120606.jpg	1	snow
imcrkridge1_2013_05_30_120608.jpg	1	snow
imcrkridge1_2013_06_01_120609.jpg	1	snow
imcrkridge1_2013_07_27_120606.jpg	0	no_snow
imcrkridge1_2013_08_17_120608.jpg	4	bad_image
imcrkridge1_2013_10_26_120606.jpg	1	snow
imcrkridge1_2013_11_24_120605.jpg	1	snow
imcrkridge1_2013_12_09_120606.jpg	1	snow
imcrkridge1_2013_12_10_120605.jpg	4	bad_image
imcrkridge1_2014_05_11_120606.jpg	1	snow
imcrkridge1_2014_10_02_120608.jpg	4	bad_image
imcrktussock_2012_08_22_120609.jpg	0	no_snow
imcrktussock_2012_10_06_120609.jpg	1	snow
imcrktussock_2013_05_04_120609.jpg	1	snow
imcrktussock_2013_05_13_120609.jpg	1	snow
imcrktussock_2013_05_29_120607.jpg	1	snow
imcrktussock_2013_05_30_120609.jpg	1	snow
imcrktussock_2013_07_03_120609.jpg	0	no_snow
imcrktussock_2013_10_05_120613.jpg	1	snow
imcrktussock_2013_10_21_120613.jpg	1	snow
imcrktussock_2013_10_25_120612.jpg	1	snow
imcrktussock_2013_11_01_120611.jpg	4	bad_image
imcrktussock_2013_11_02_120611.jpg	4	bad_image
imcrktussock_2013_12_27_120612.jpg	1	snow
imcrktussock_2014_01_21_120611.jpg	1	snow
imcrktussock_2014_10_04_120611.jpg	4	bad_image
imcrktussock_2014_10_05_120611.jpg	4	bad_image
jasperridge_2012_05_19_120922.jpg	0	no_snow
jasperridge_2012_07_05_120104.jpg	0	no_snow
jasperridge_2013_05_19_120923.jpg	0	no_snow
jasperridge_2013_08_07_120414.jpg	0	no_snow
jasperridge_2014_07_22_120001.jpg	0	no_snow
jasperridge_2014_10_08_120001.jpg	0	no_snow
jerbajada_2014_04_30_120007.jpg	0	no_snow
jerbajada_2014_06_12_120006.jpg	0	no_snow
jerbajada_2014_07_22_120006.jpg	0	no_snow
jerbajada_2014_09_30_120006.jpg	0	no_snow
jernort_2014_07_04_120006.jpg	0	no_snow
jernort_2014_07_15_120007.jpg	0	no_snow
jersand_2014_02_28_153008.jpg	0	no_snow
jersand_2014_06_16_120006.jpg	0	no_snow
jersand_2014_07_16_120006.jpg	0	no_snow
jersand_2014_10_18_120006.jpg	0	no_snow
joycekilmer_2006_08_14_120000.jpg	0	no_snow
joycekilmer_2006_11_02_120000.jpg	0	no_snow
joycekilmer_2007_07_18_120000.jpg	0	no_snow
joycekilmer_2007_08_06_120000.jpg	0	no_snow
joycekilmer_2007_11_21_120000.jpg	4	bad_image
joycekilmer_2008_02_29_120000.jpg	3	snow_on_ground
joycekilmer_2009_11_23_120200.jpg	4	bad_image
joycekilmer_2010_01_29_120800.jpg	0	no_snow
joycekilmer_2010_02_14_080100.jpg	4	bad_image
joycekilmer_2010_06_20_120100.jpg	0	no_snow
joycekilmer_2010_08_18_120100.jpg	0	no_snow
joycekilmer_2010_08_29_120100.jpg	0	no_snow
joycekilmer_2011_03_17_120100.jpg	0	no_snow
joycekilmer_2011_03_31_120100.jpg	4	bad_image
joycekilmer_2011_12_12_120129.jpg	0	no_snow
joycekilmer_2012_04_11_080045.jpg	0	no_snow
joycekilmer_2012_05_21_120100.jpg	0	no_snow
joycekilmer_2012_09_22_120101.jpg	0	no_snow
joycekilmer_2012_11_17_120051.jpg	0	no_snow
joycekilmer_2013_03_23_120243.jpg	4	bad_image
joycekilmer_2013_05_14_120304.jpg	0	no_snow
joycekilmer_2013_06_22_120137.jpg	0	no_snow
joycekilmer_2013_11_18_120050.jpg	0	no_snow
joycekilmer_2014_02_09_120044.jpg	4	bad_image
joycekilmer_2014_06_21_120034.jpg	0	no_snow
joycekilmer_2014_12_29_120034.jpg	4	bad_image
kamuela_2011_04_16_114644.jpg	0	no_snow
kamuela_2011_06_07_120146.jpg	0	no_snow
kamuela_2012_01_18_120149.jpg	0	no_snow
kamuela_2012_08_10_120148.jpg	0	no_snow
kamuela_2012_09_30_120143.jpg	0	no_snow
kamuela_2012_11_02_120145.jpg	0	no_snow
kamuela_2013_01_29_120146.jpg	0	no_snow
kamuela_2013_03_14_120155.jpg	0	no_snow
kamuela_2013_06_11_120146.jpg	0	no_snow
kamuela_2013_09_07_120145.jpg	0	no_snow
kamuela_2013_09_17_120146.jpg	0	no_snow
kamuela_2013_12_11_120145.jpg	0	no_snow
kamuela_2014_07_07_120145.jpg	0	no_snow
kamuela_2014_07_16_120145.jpg	0	no_snow
kamuela_2014_09_03_114643.jpg	0	no_snow
kamuela_2014_09_26_120146.jpg	0	no_snow
kansas_2013_01_28_120900.jpg	0	no_snow
kansas_2013_05_11_113900.jpg	0	no_snow
kansas_2013_06_09_120900.jpg	0	no_snow
kansas_2013_07_09_120900.jpg	0	no_snow
kansas_2013_08_23_120900.jpg	0	no_snow
kansas_2013_08_31_120900.jpg	0	no_snow
kansas_2013_09_11_120900.jpg	0	no_snow
kansas_2013_09_18_120900.jpg	0	no_snow
kansas_2013_11_30_120900.jpg	0	no_snow
kansas_2014_06_14_120900.jpg	0	no_snow
kansas_2014_08_26_120900.jpg	0	no_snow
kansas_2014_09_04_113900.jpg	0	no_snow
kansas_2014_09_05_120900.jpg	0	no_snow
kansas_2014_12_25_120900.jpg	0	no_snow
kaweah_2008_09_09_121700.jpg	0	no_snow
kaweah_2008_10_28_113400.jpg	0	no_snow
kaweah_2009_01_14_122200.jpg	0	no_snow
kaweah_2009_02_19_120500.jpg	0	no_snow
kaweah_2009_05_23_120500.jpg	0	no_snow
kaweah_2009_05_26_120600.jpg	0	no_snow
kaweah_2009_08_07_050100.jpg	4	bad_image
kaweah_2009_08_15_120100.jpg	0	no_snow
kaweah_2009_09_14_120200.jpg	0	no_snow
kaweah_2009_11_17_120300.jpg	0	no_snow
kaweah_2009_12_08_120500.jpg	0	no_snow
kaweah_2010_01_24_120100.jpg	0	no_snow
kaweah_2010_06_02_120100.jpg	0	no_snow
kaweah_2010_12_23_120100.jpg	0	no_snow
kaweah_2011_09_09_120100.jpg	0	no_snow
kaweah_2011_10_21_120110.jpg	0	no_snow
kaweah_2012_09_17_120143.jpg	0	no_snow
kaweah_2012_09_29_120059.jpg	0	no_snow
kaweah_2012_12_03_120131.jpg	0	no_snow
kaweah_2013_01_01_120116.jpg	0	no_snow
kaweah_2013_08_14_120045.jpg	0	no_snow
kaweah_2013_10_31_120041.jpg	0	no_snow
kaweah_2013_12_14_120048.jpg	0	no_snow
kaweah_2013_12_20_120039.jpg	0	no_snow
kaweah_2013_12_24_120037.jpg	0	no_snow
kaweah_2014_05_01_120029.jpg	0	no_snow
kaweah_2014_06_02_120034.jpg	0	no_snow
kaweah_2014_07_09_120041.jpg	0	no_snow
kaweah_2014_08_11_120035.jpg	0	no_snow
kaweah_2014_09_24_120041.jpg	0	no_snow
kaweah_2014_11_16_120029.jpg	0	no_snow
kelloggcorn_2014_06_07_110300.jpg	0	no_snow
kelloggcorn_2014_06_26_110300.jpg	0	no_snow
kelloggcorn_2014_11_29_110300.jpg	1	snow
kelloggcorn_2014_12_26_110300.jpg	0	no_snow
kendall_2012_07_18_115717.jpg	0	no_snow
kendall_2012_07_25_113113.jpg	0	no_snow
kendall_2012_08_11_120118.jpg	0	no_snow
kendall_2012_09_16_120109.jpg	0	no_snow
kendall_2012_09_21_120126.jpg	0	no_snow
kendall_2012_10_05_120109.jpg	0	no_snow
kendall_2012_10_27_120108.jpg	0	no_snow
kendall_2012_10_29_120119.jpg	0	no_snow
kendall_2012_11_17_120107.jpg	0	no_snow
kendall_2013_01_21_120121.jpg	0	no_snow
kendall_2013_02_18_110108.jpg	0	no_snow
kendall_2013_03_03_120107.jpg	0	no_snow
kendall_2013_03_13_120108.jpg	0	no_snow
kendall_2013_03_17_110129.jpg	0	no_snow
kendall_2013_03_25_120108.jpg	0	no_snow
kendall_2013_04_27_120113.jpg	0	no_snow
kendall_2013_04_29_100106.jpg	0	no_snow
kendall_2013_05_18_120140.jpg	0	no_snow
kendall_2013_05_19_110137.jpg	0	no_snow
kendall_2013_07_10_120114.jpg	0	no_snow
kendall_2013_08_11_120111.jpg	0	no_snow
kendall_2013_10_02_120923.jpg	0	no_snow
kendall_2013_10_08_120113.jpg	0	no_snow
kendall_2013_11_12_120112.jpg	0	no_snow
kendall_2013_12_20_120109.jpg	0	no_snow
kendall_2014_03_17_120119.jpg	0	no_snow
kendall_2014_05_05_120116.jpg	0	no_snow
kendall_2014_10_31_120109.jpg	0	no_snow
kendall_2014_12_21_120112.jpg	0	no_snow
konza_2012_10_03_113105.jpg	0	no_snow
konza_2012_10_24_133120.jpg	0	no_snow
konza_2013_02_28_085031.jpg	1	snow
konza_2013_05_18_120118.jpg	0	no_snow
konza_2013_07_26_120119.jpg	0	no_snow
konza_2013_09_01_120116.jpg	0	no_snow
konza_2013_09_03_120118.jpg	0	no_snow
konza_2013_09_05_120119.jpg	0	no_snow
konza_2013_11_18_120119.jpg	0	no_snow
konza_2014_06_17_120105.jpg	0	no_snow
konza_2014_07_11_120106.jpg	0	no_snow
laurentides_2011_11_21_120146.jpg	0	no_snow
laurentides_2011_12_24_120219.jpg	2	snow_on_trees
laurentides_2013_09_04_120039.jpg	0	no_snow
laurentides_2013_10_21_120051.jpg	0	no_snow
laurentides_2014_01_04_120039.jpg	2	snow_on_trees
laurentides_2014_03_24_120047.jpg	2	snow_on_trees
laurentides_2014_10_27_120034.jpg	0	no_snow
laurentides_2014_11_15_120503.jpg	0	no_snow
laurentides_2014_11_25_120033.jpg	3	snow_on_ground
lethbridge_2011_12_26_120112.jpg	0	no_snow
lethbridge_2012_01_22_120110.jpg	0	no_snow
lethbridge_2012_02_04_120111.jpg	0	no_snow
lethbridge_2012_02_08_120112.jpg	0	no_snow
lethbridge_2012_05_02_113112.jpg	0	no_snow
lethbridge_2012_06_14_120113.jpg	0	no_snow
lethbridge_2012_10_27_120113.jpg	1	snow
lethbridge_2012_10_30_120113.jpg	1	snow
lethbridge_2012_12_06_120112.jpg	0	no_snow
lethbridge_2012_12_16_120112.jpg	0	no_snow
lethbridge_2013_01_17_120114.jpg	1	snow
lethbridge_2013_03_30_120113.jpg	0	no_snow
lethbridge_2013_04_11_120114.jpg	0	no_snow
lethbridge_2013_06_11_120113.jpg	0	no_snow
lethbridge_2013_06_15_120113.jpg	0	no_snow
lethbridge_2013_07_11_120113.jpg	0	no_snow
lethbridge_2013_08_22_120114.jpg	0	no_snow
lethbridge_2013_10_31_120113.jpg	1	snow
lethbridge_2013_11_08_120924.jpg	0	no_snow
lethbridge_2013_11_20_120111.jpg	1	snow
lethbridge_2014_01_17_120923.jpg	0	no_snow
lethbridge_2014_01_31_120113.jpg	1	snow
lethbridge_2014_07_08_120113.jpg	0	no_snow
luckyhills_2013_12_01_110109.jpg	0	no_snow
luckyhills_2014_02_04_120114.jpg	0	no_snow
luckyhills_2014_02_06_120116.jpg	0	no_snow
luckyhills_2014_08_19_120117.jpg	0	no_snow
luckyhills_2014_10_04_120112.jpg	0	no_snow
mammothcave_2003_01_20_130000.jpg	3	snow_on_ground
mammothcave_2003_08_18_120000.jpg	0	no_snow
mammothcave_2003_08_23_120000.jpg	0	no_snow
mammothcave_2003_09_16_120000.jpg	0	no_snow
mammothcave_2003_11_26_120000.jpg	0	no_snow
mammothcave_2003_12_23_120000.jpg	0	no_snow
mammothcave_2004_03_22_120000.jpg	0	no_snow
mammothcave_2004_04_22_120000.jpg	0	no_snow
mammothcave_2004_07_12_120000.jpg	0	no_snow
mammothcave_2005_02_14_120000.jpg	0	no_snow
mammothcave_2005_03_21_120000.jpg	0	no_snow
mammothcave_2005_06_14_120000.jpg	0	no_snow
mammothcave_2005_06_15_120000.jpg	0	no_snow
mammothcave_2005_10_27_120000.jpg	0	no_snow
mammothcave_2006_01_13_120000.jpg	0	no_snow
mammothcave_2006_02_02_120000.jpg	0	no_snow
mammothcave_2006_03_15_120000.jpg	0	no_snow
mammothcave_2006_04_08_120000.jpg	0	no_snow
mammothcave_2006_07_26_120000.jpg	0	no_snow
mammothcave_2006_10_27_120000.jpg	0	no_snow
mammothcave_2006_12_30_120000.jpg	0	no_snow
mammothcave_2007_02_01_120000.jpg	0	no_snow
mammothcave_2007_03_07_120000.jpg	0	no_snow
mammothcave_2007_06_14_120000.jpg	0	no_snow
mammothcave_2007_06_28_120000.jpg	0	no_snow
mammothcave_2007_10_08_120000.jpg	0	no_snow
mammothcave_2007_12_27_120000.jpg	0	no_snow
mammothcave_2008_03_26_120000.jpg	0	no_snow
mammothcave_2008_05_16_120000.jpg	0	no_snow
mammothcave_2010_02_19_120600.jpg	0	no_snow
mammothcave_2010_11_05_120300.jpg	0	no_snow
mammothcave_2011_01_12_120100.jpg	3	snow_on_ground
mammothcave_2011_07_05_120100.jpg	0	no_snow
mammothcave_2011_12_11_120144.jpg	0	no_snow
mammothcave_2012_02_21_120303.jpg	0	no_snow
mammothcave_2012_09_11_120116.jpg	0	no_snow
mammothcave_2012_10_01_120105.jpg	0	no_snow
mammothcave_2013_05_21_120358.jpg	0	no_snow
mammothcave_2013_06_13_120422.jpg	0	no_snow
mammothcave_2013_06_30_120307.jpg	0	no_snow
mammothcave_2013_08_15_120041.jpg	0	no_snow
marena_2012_07_12_103001.jpg	0	no_snow
marena_2012_08_15_103001.jpg	0	no_snow
marena_2012_08_29_103001.jpg	0	no_snow
marena_2012_10_16_120001.jpg	0	no_snow
marena_2012_10_28_120002.jpg	0	no_snow
marena_2012_11_14_120002.jpg	0	no_snow
marena_2012_11_23_120001.jpg	0	no_snow
marena_2012_11_27_120002.jpg	0	no_snow
marena_2013_02_01_120001.jpg	0	no_snow
marena_2013_02_13_120002.jpg	0	no_snow
marena_2013_03_31_120002.jpg	0	no_snow
marena_2013_04_04_120002.jpg	0	no_snow
marena_2013_04_30_120001.jpg	0	no_snow
marena_2013_06_30_120001.jpg	0	no_snow
marena_2013_08_22_120002.jpg	0	no_snow
marena_2013_09_15_120001.jpg	0	no_snow
marena_2013_11_10_103001.jpg	0	no_snow
marena_2013_12_23_120001.jpg	0	no_snow
marena_2014_02_22_120001.jpg	0	no_snow
marena_2014_06_13_120001.jpg	0	no_snow
marena_2014_09_29_120001.jpg	0	no_snow
marena_2014_10_19_120001.jpg	0	no_snow
mayberry_2010_11_17_114500.jpg	0	no_snow
mayberry_2011_01_24_121500.jpg	0	no_snow
mayberry_2011_03_17_114500.jpg	0	no_snow
mayberry_2011_05_18_114500.jpg	0	no_snow
mayberry_2011_11_10_114500.jpg	0	no_snow
mayberry_2012_04_03_114500.jpg	0	no_snow
mayberry_2012_04_05_114500.jpg	0	no_snow
mayberry_2012_04_29_114500.jpg	0	no_snow
mayberry_2012_08_25_114500.jpg	0	no_snow
mayberry_2012_09_28_114500.jpg	0	no_snow
mayberry_2013_07_24_114500.jpg	0	no_snow
mayberry_2014_06_10_114500.jpg	0	no_snow
mayberry_2014_07_19_114500.jpg	0	no_snow
merbleue_2012_11_22_120105.jpg	0	no_snow
merbleue_2012_11_30_120922.jpg	1	snow
merbleue_2013_01_02_120104.jpg	1	snow
merbleue_2013_01_24_120104.jpg	1	snow
merbleue_2013_03_06_120104.jpg	1	snow
merbleue_2013_03_14_120103.jpg	1	snow
merbleue_2013_04_14_120104.jpg	1	snow
merbleue_2013_05_06_120105.jpg	0	no_snow
merbleue_2013_05_17_120105.jpg	0	no_snow
merbleue_2013_06_06_120924.jpg	0	no_snow
merbleue_2013_06_11_120104.jpg	0	no_snow
merbleue_2013_08_12_120104.jpg	0	no_snow
merbleue_2013_08_28_120105.jpg	0	no_snow
merbleue_2013_09_28_120103.jpg	0	no_snow
merbleue_2013_09_30_120105.jpg	0	no_snow
merbleue_2013_11_04_120105.jpg	0	no_snow
merbleue_2013_11_25_120103.jpg	1	snow
merbleue_2014_01_12_120104.jpg	1	snow
merbleue_2014_08_09_120106.jpg	0	no_snow
merbleue_2014_09_28_120106.jpg	0	no_snow
missouriozarks_2007_01_23_122000.jpg	3	snow_on_ground
missouriozarks_2007_02_13_122000.jpg	4	bad_image
missouriozarks_2007_07_13_122000.jpg	0	no_snow
missouriozarks_2008_02_25_122000.jpg	0	no_snow
missouriozarks_2008_03_06_122000.jpg	0	no_snow
missouriozarks_2008_05_17_122000.jpg	0	no_snow
missouriozarks_2012_07_24_120111.jpg	0	no_snow
missouriozarks_2013_02_27_120109.jpg	2	snow_on_trees
missouriozarks_2013_03_07_120109.jpg	3	snow_on_ground
missouriozarks_2013_05_18_120109.jpg	0	no_snow
missouriozarks_2013_05_27_120111.jpg	0	no_snow
missouriozarks_2013_06_22_120110.jpg	0	no_snow
missouriozarks_2013_09_15_120111.jpg	0	no_snow
missouriozarks_2013_10_01_120108.jpg	0	no_snow
missouriozarks_2013_12_04_120110.jpg	0	no_snow
missouriozarks_2014_06_17_120110.jpg	0	no_snow
missouriozarks_2014_08_06_120111.jpg	0	no_snow
missouriozarks_2014_08_16_120110.jpg	0	no_snow
missouriozarks_2014_09_25_120111.jpg	0	no_snow
morganmonroe_2010_10_16_113136.jpg	0	no_snow
morganmonroe_2010_10_28_113139.jpg	0	no_snow
morganmonroe_2010_11_02_113137.jpg	0	no_snow
morganmonroe_2011_04_04_115048.jpg	4	bad_image
morganmonroe_2011_06_06_113138.jpg	0	no_snow
morganmonroe_2011_10_03_113136.jpg	0	no_snow
morganmonroe_2011_11_15_113135.jpg	0	no_snow
morganmonroe_2012_10_06_113137.jpg	0	no_snow
morganmonroe_2013_07_01_113138.jpg	0	no_snow
morganmonroe_2013_09_05_113137.jpg	0	no_snow
morganmonroe_2013_10_14_120137.jpg	0	no_snow
morganmonroe_2014_08_23_113137.jpg	0	no_snow
morganmonroe_2014_12_29_113137.jpg	0	no_snow
mounthood_2001_02_13_120000.jpg	4	bad_image
mounthood_2002_01_06_120000.jpg	2	snow_on_trees
mounthood_2002_07_03_120000.jpg	3	snow_on_ground
mounthood_2002_07_13_120000.jpg	0	no_snow
mounthood_2002_08_14_120000.jpg	0	no_snow
mounthood_2002_12_21_120000.jpg	2	snow_on_trees
mounthood_2002_12_30_120000.jpg	2	snow_on_trees
mounthood_2002_12_31_120000.jpg	2	snow_on_trees
mounthood_2003_02_01_120000.jpg	2	snow_on_trees
mounthood_2003_03_02_120000.jpg	2	snow_on_trees
mounthood_2003_03_10_120000.jpg	2	snow_on_trees
mounthood_2003_04_03_120000.jpg	2	snow_on_trees
mounthood_2003_09_04_120000.jpg	0	no_snow
mounthood_2003_09_25_120000.jpg	0	no_snow
mounthood_2003_11_13_120000.jpg	2	snow_on_trees
mounthood_2004_09_04_120000.jpg	0	no_snow
mounthood_2005_01_11_120000.jpg	2	snow_on_trees
mounthood_2005_05_19_120000.jpg	2	snow_on_trees
mounthood_2006_12_05_120000.jpg	2	snow_on_trees
mounthood_2007_03_09_120000.jpg	2	snow_on_trees
mounthood_2007_03_21_120000.jpg	2	snow_on_trees
mounthood_2007_06_24_120000.jpg	0	no_snow
mounthood_2007_09_06_120000.jpg	0	no_snow
mounthood_2008_06_22_120000.jpg	3	snow_on_ground
mounthood_2008_09_17_120000.jpg	0	no_snow
mounthood_2008_10_11_120000.jpg	3	snow_on_ground
mounthood_2008_11_20_120000.jpg	4	bad_image
mounthood_2008_12_15_120000.jpg	2	snow_on_trees
mounthood_2008_12_19_120000.jpg	2	snow_on_trees
mounthood_2009_05_08_120000.jpg	2	snow_on_trees
mounthood_2009_11_04_120100.jpg	3	snow_on_ground
mounthood_2010_01_04_120300.jpg	3	snow_on_ground
mounthood_2010_06_30_120100.jpg	3	snow_on_ground
mounthood_2011_04_23_120100.jpg	2	snow_on_trees
mounthood_2011_06_23_120100.jpg	3	snow_on_ground
mounthood_2011_07_22_120100.jpg	3	snow_on_ground
mounthood_2011_12_30_130155.jpg	2	snow_on_trees
mounthood_2012_02_05_120203.jpg	3	snow_on_ground
mounthood_2012_02_25_120335.jpg	2	snow_on_trees
mounthood_2012_12_29_120104.jpg	2	snow_on_trees
mounthood_2013_05_24_120254.jpg	2	snow_on_trees
mounthood_2014_02_18_120043.jpg	2	snow_on_trees
mounthood_2014_05_12_120036.jpg	3	snow_on_ground
mounthood_2014_08_14_120053.jpg	0	no_snow
mounthood_2014_08_25_120038.jpg	0	no_snow
mounthood_2014_09_13_120048.jpg	0	no_snow
mounthood_2014_10_11_120037.jpg	0	no_snow
mountranier_2004_02_25_100000.jpg	2	snow_on_trees
mountranier_2004_04_17_090000.jpg	2	snow_on_trees
mountranier_2004_11_08_100000.jpg	3	snow_on_ground
mountranier_2005_01_08_100000.jpg	2	snow_on_trees
mountranier_2005_01_21_100000.jpg	3	snow_on_ground
mountranier_2005_03_08_100000.jpg	3	snow_on_ground
mountranier_2005_03_12_100000.jpg	3	snow_on_ground
mountranier_2005_03_14_100000.jpg	3	snow_on_ground
mountranier_2006_06_28_090000.jpg	3	snow_on_ground
mountranier_2006_07_07_090000.jpg	0	no_snow
mountranier_2007_01_20_100000.jpg	2	snow_on_trees
mountranier_2007_04_11_090000.jpg	2	snow_on_trees
mountranier_2008_02_25_100000.jpg	4	bad_image
mountranier_2008_06_04_090000.jpg	2	snow_on_trees
mountranier_2008_07_29_090000.jpg	3	snow_on_ground
mountranier_2009_04_04_120500.jpg	2	snow_on_trees
mountranier_2010_05_24_120200.jpg	2	snow_on_trees
mountranier_2010_07_14_120100.jpg	3	snow_on_ground
mountranier_2010_09_16_120100.jpg	4	bad_image
mountranier_2010_09_24_120200.jpg	4	bad_image
mountranier_2011_03_13_120100.jpg	2	snow_on_trees
mountranier_2011_05_06_130200.jpg	4	bad_image
mountranier_2011_10_03_140200.jpg	0	no_snow
mountranier_2012_01_11_120215.jpg	3	snow_on_ground
mountranier_2012_02_04_120233.jpg	4	bad_image
mountranier_2012_02_12_120241.jpg	2	snow_on_trees
mountranier_2012_03_17_120225.jpg	4	bad_image
mountranier_2012_12_23_120149.jpg	2	snow_on_trees
mountranier_2013_01_12_120141.jpg	2	snow_on_trees
mountranier_2013_06_28_120326.jpg	3	snow_on_ground
mountranier_2013_12_12_120045.jpg	2	snow_on_trees
nationalcapital_2004_12_06_150000.jpg	0	no_snow
nationalcapital_2004_12_21_150000.jpg	0	no_snow
nationalcapital_2005_02_23_150000.jpg	0	no_snow
nationalcapital_2006_06_16_140000.jpg	0	no_snow
nationalcapital_2007_03_06_150000.jpg	0	no_snow
nationalcapital_2007_04_13_140000.jpg	0	no_snow
nationalcapital_2007_08_30_140000.jpg	0	no_snow
nationalcapital_2007_10_10_140000.jpg	0	no_snow
nationalcapital_2008_09_18_121400.jpg	0	no_snow
nationalcapital_2009_01_26_122700.jpg	0	no_snow
nationalcapital_2009_05_03_120500.jpg	0	no_snow
nationalcapital_2009_06_09_130100.jpg	0	no_snow
nationalcapital_2009_12_17_120400.jpg	0	no_snow
nationalcapital_2010_02_23_130300.jpg	3	snow_on_ground
nationalcapital_2010_04_30_120500.jpg	0	no_snow
nationalcapital_2010_07_11_120000.jpg	0	no_snow
nationalcapital_2011_03_21_120100.jpg	0	no_snow
nationalcapital_2012_03_13_120248.jpg	0	no_snow
nationalcapital_2012_07_23_120121.jpg	0	no_snow
nationalcapital_2012_07_25_120158.jpg	0	no_snow
nationalcapital_2012_11_25_120118.jpg	0	no_snow
nationalcapital_2012_12_23_120151.jpg	0	no_snow
nationalcapital_2013_12_18_120053.jpg	0	no_snow
nationalcapital_2013_12_26_120049.jpg	0	no_snow
nationalcapital_2014_01_08_120052.jpg	0	no_snow
nationalcapital_2014_02_14_120047.jpg	3	snow_on_ground
nationalcapital_2014_04_09_130044.jpg	0	no_snow
nationalcapital_2014_05_15_120040.jpg	0	no_snow
nationalcapital_2014_07_05_120103.jpg	0	no_snow
nationalcapital_2014_07_22_120046.jpg	0	no_snow
nationalcapital_2014_08_22_120053.jpg	0	no_snow
ncssm_2013_07_27_120103.jpg	0	no_snow
ncssm_2013_10_10_120105.jpg	0	no_snow
ncssm_2013_12_11_120104.jpg	4	bad_image
ncssm_2014_02_25_120104.jpg	0	no_snow
ncssm_2014_03_14_120104.jpg	0	no_snow
ncssm_2014_03_20_120106.jpg	0	no_snow
ncssm_2014_06_01_120105.jpg	0	no_snow
ncssm_2014_06_08_120104.jpg	0	no_snow
ncssm_2014_08_05_120104.jpg	0	no_snow
niwot2_2009_08_07_063140.jpg	0	no_snow
niwot2_2009_10_31_120140.jpg	3	snow_on_ground
niwot2_2010_01_07_120140.jpg	2	snow_on_trees
niwot2_2010_02_24_120140.jpg	2	snow_on_trees
niwot2_2010_03_13_120139.jpg	3	snow_on_ground
niwot2_2011_03_11_120142.jpg	3	snow_on_ground
niwot2_2011_09_15_120141.jpg	0	no_snow
niwot2_2011_10_02_120140.jpg	0	no_snow
niwot2_2011_10_27_120140.jpg	2	snow_on_trees
niwot2_2011_11_17_120141.jpg	3	snow_on_ground
niwot2_2011_12_27_120140.jpg	3	snow_on_ground
niwot2_2012_02_05_120139.jpg	2	snow_on_trees
niwot2_2012_07_28_120141.jpg	0	no_snow
niwot2_2012_08_03_120139.jpg	0	no_snow
niwot2_2013_01_08_120140.jpg	3	snow_on_ground
niwot2_2013_01_23_120140.jpg	3	snow_on_ground
niwot2_2013_03_16_120142.jpg	3	snow_on_ground
niwot2_2013_04_30_120141.jpg	3	snow_on_ground
niwot2_2013_05_10_124641.jpg	2	snow_on_trees
niwot2_2013_07_08_120141.jpg	0	no_snow
niwot2_2014_03_31_120140.jpg	2	snow_on_trees
niwot2_2014_04_14_120140.jpg	2	snow_on_trees
niwot2_2014_04_19_120141.jpg	3	snow_on_ground
niwot2_2014_06_29_103141.jpg	0	no_snow
niwot2_2014_07_20_120141.jpg	0	no_snow
niwot2_2014_08_13_120141.jpg	0	no_snow
niwot2_2014_09_16_120141.jpg	0	no_snow
niwot2_2014_10_20_120141.jpg	0	no_snow
niwot2_2014_11_20_120141.jpg	3	snow_on_ground
niwot2_2014_12_12_120141.jpg	3	snow_on_ground
northattleboroma_2012_04_26_120104.jpg	0	no_snow
northattleboroma_2012_04_27_120104.jpg	0	no_snow
northattleboroma_2012_05_29_120104.jpg	0	no_snow
northattleboroma_2014_06_29_120104.jpg	0	no_snow
nwohiocrop_2012_07_06_130430.jpg	0	no_snow
nwohiocrop_2012_08_23_110312.jpg	0	no_snow
nwohiocrop_2012_09_02_110314.jpg	0	no_snow
nwohiocrop_2012_10_22_110312.jpg	0	no_snow
nwohiocrop_2012_12_20_110314.jpg	0	no_snow
nwohiocrop_2013_02_19_110310.jpg	0	no_snow
nwohiocrop_2013_05_01_110314.jpg	0	no_snow
nwohiocrop_2013_08_05_110312.jpg	0	no_snow
nwohiocrop_2013_08_07_110312.jpg	0	no_snow
nwohiocrop_2013_09_03_110312.jpg	0	no_snow
oakridge1_2007_06_28_152000.jpg	0	no_snow
oakridge1_2007_08_29_152000.jpg	0	no_snow
oakridge1_2007_10_23_152000.jpg	0	no_snow
oakridge1_2008_05_12_122000.jpg	0	no_snow
oakridge1_2009_07_09_122000.jpg	0	no_snow
oakridge1_2009_09_20_122000.jpg	0	no_snow
oakridge1_2009_11_18_122000.jpg	4	bad_image
oakridge1_2010_03_23_122000.jpg	0	no_snow
oakridge1_2010_05_09_122000.jpg	0	no_snow
oakridge1_2010_09_26_122000.jpg	0	no_snow
oakridge1_2011_06_20_122000.jpg	0	no_snow
oakridge1_2012_01_05_122000.jpg	4	bad_image
oakridge1_2012_12_24_122000.jpg	4	bad_image
oakridge1_2013_04_16_122000.jpg	0	no_snow
oakridge1_2013_10_14_122000.jpg	0	no_snow
oakridge1_2013_11_26_122000.jpg	4	bad_image
oakridge1_2014_04_29_122000.jpg	0	no_snow
oakridge1_2014_07_10_122000.jpg	0	no_snow
oakridge1_2014_08_30_122000.jpg	0	no_snow
oakridge1_2014_10_16_122000.jpg	0	no_snow
oakridge2_2006_11_20_152000.jpg	0	no_snow
oakridge2_2006_12_13_152000.jpg	4	bad_image
oakridge2_2007_06_09_152000.jpg	0	no_snow
oakridge2_2007_08_08_152000.jpg	0	no_snow
oakridge2_2007_12_14_152000.jpg	0	no_snow
oakridge2_2008_04_06_122000.jpg	0	no_snow
oakridge2_2008_05_30_122000.jpg	0	no_snow
oakridge2_2009_03_16_122000.jpg	4	bad_image
oakridge2_2009_07_24_122000.jpg	0	no_snow
oakridge2_2009_10_25_122000.jpg	0	no_snow
oakridge2_2010_01_29_122000.jpg	0	no_snow
oakridge2_2010_03_25_122000.jpg	0	no_snow
oakridge2_2010_04_10_122000.jpg	0	no_snow
oakridge2_2010_09_06_122000.jpg	0	no_snow
oakridge2_2011_05_23_122000.jpg	0	no_snow
oakridge2_2011_05_24_122000.jpg	0	no_snow
oakridge2_2012_02_06_122000.jpg	0	no_snow
oakridge2_2012_08_10_122000.jpg	0	no_snow
oakridge2_2012_11_27_122000.jpg	0	no_snow
oakridge2_2013_03_23_122000.jpg	0	no_snow
oakridge2_2013_04_11_122000.jpg	0	no_snow
oakridge2_2013_07_11_122000.jpg	0	no_snow
oakridge2_2013_08_18_122000.jpg	0	no_snow
oakridge2_2013_12_22_122000.jpg	0	no_snow
oakridge2_2014_01_29_122000.jpg	2	snow_on_trees
oakridge2_2014_04_21_122000.jpg	0	no_snow
oakridge2_2014_10_14_122000.jpg	0	no_snow
oakridge2_2014_10_28_122000.jpg	0	no_snow
oregonMP_2011_06_29_120114.jpg	0	no_snow
oregonMP_2013_01_29_120114.jpg	2	snow_on_trees
oregonMP_2013_04_06_120122.jpg	0	no_snow
oregonMP_2013_04_12_120113.jpg	0	no_snow
oregonMP_2013_09_09_120149.jpg	0	no_snow
oregonMP_2013_09_29_120115.jpg	0	no_snow
oregonMP_2014_04_01_120122.jpg	2	snow_on_trees
oregonMP_2014_12_16_120109.jpg	2	snow_on_trees
oregonYP_2011_10_05_120552.jpg	0	no_snow
oregonYP_2011_10_22_120745.jpg	0	no_snow
oregonYP_2012_02_23_120334.jpg	0	no_snow
oregonYP_2012_06_30_210755.jpg	4	bad_image
oregonYP_2012_09_03_070807.jpg	0	no_snow
oregonYP_2013_03_14_140922.jpg	0	no_snow
oregonYP_2013_10_27_110548.jpg	0	no_snow
oregonYP_2014_06_15_150118.jpg	0	no_snow
oregonYP_2014_06_28_120109.jpg	0	no_snow
oregonYP_2014_07_06_120109.jpg	0	no_snow
oregonYP_2014_08_18_120110.jpg	0	no_snow
oregonYP_2014_09_17_120138.jpg	0	no_snow
pasayten_2000_11_22_120000.jpg	2	snow_on_trees
pasayten_2001_03_15_120000.jpg	4	bad_image
pasayten_2001_05_18_120000.jpg	4	bad_image
pasayten_2001_06_30_120000.jpg	0	no_snow
pasayten_2002_01_11_120000.jpg	3	snow_on_ground
pasayten_2002_01_29_120000.jpg	3	snow_on_ground
pasayten_2002_04_08_120000.jpg	3	snow_on_ground
pasayten_2002_07_15_120000.jpg	0	no_snow
pasayten_2002_09_21_120000.jpg	0	no_snow
pasayten_2003_02_17_120000.jpg	2	snow_on_trees
pasayten_2003_05_05_120000.jpg	4	bad_image
pasayten_2003_05_13_120000.jpg	4	bad_image
pasayten_2004_01_25_120000.jpg	2	snow_on_trees
pasayten_2004_03_23_120000.jpg	3	snow_on_ground
pasayten_2004_10_18_120000.jpg	0	no_snow
pasayten_2004_11_07_120000.jpg	0	no_snow
pasayten_2004_11_25_120000.jpg	0	no_snow
pasayten_2004_12_17_120000.jpg	3	snow_on_ground
pasayten_2005_05_18_120000.jpg	4	bad_image
pasayten_2005_06_21_120000.jpg	0	no_snow
pasayten_2005_07_27_120000.jpg	0	no_snow
pasayten_2005_12_23_120000.jpg	2	snow_on_trees
pasayten_2006_08_12_120000.jpg	0	no_snow
pasayten_2006_11_10_120000.jpg	4	bad_image
pasayten_2007_04_20_120000.jpg	3	snow_on_ground
pasayten_2007_06_20_120000.jpg	0	no_snow
pasayten_2007_09_17_120000.jpg	0	no_snow
pasayten_2007_10_17_120000.jpg	0	no_snow
pasayten_2007_10_18_120000.jpg	2	snow_on_trees
pasayten_2007_10_26_120000.jpg	0	no_snow
pasayten_2008_07_07_150000.jpg	0	no_snow
pasayten_2008_07_21_120000.jpg	0	no_snow
pasayten_2009_05_15_120000.jpg	0	no_snow
pasayten_2009_06_17_120200.jpg	0	no_snow
pasayten_2010_12_14_120200.jpg	2	snow_on_trees
pasayten_2011_05_28_120100.jpg	2	snow_on_trees
pasayten_2011_06_23_120100.jpg	0	no_snow
pasayten_2011_10_13_120126.jpg	0	no_snow
pasayten_2012_05_11_120117.jpg	0	no_snow
pasayten_2012_06_30_120114.jpg	0	no_snow
pasayten_2013_07_09_120218.jpg	0	no_snow
pasayten_2013_07_18_120130.jpg	0	no_snow
pasayten_2014_01_19_120050.jpg	3	snow_on_ground
pasayten_2014_03_18_120103.jpg	3	snow_on_ground
pasayten_2014_03_30_120054.jpg	3	snow_on_ground
pointreyes_2004_02_04_120000.jpg	0	no_snow
pointreyes_2004_04_08_100000.jpg	4	bad_image
pointreyes_2005_09_12_100000.jpg	0	no_snow
pointreyes_2005_10_11_100000.jpg	4	bad_image
pointreyes_2005_11_14_110000.jpg	4	bad_image
pointreyes_2005_11_19_110000.jpg	0	no_snow
pointreyes_2006_12_03_110000.jpg	0	no_snow
pointreyes_2007_05_02_100000.jpg	4	bad_image
pointreyes_2007_10_06_100000.jpg	0	no_snow
pointreyes_2007_10_31_100000.jpg	4	bad_image
pointreyes_2008_01_20_110000.jpg	0	no_snow
pointreyes_2008_01_22_110000.jpg	0	no_snow
pointreyes_2008_01_28_110000.jpg	0	no_snow
pointreyes_2008_07_26_100000.jpg	0	no_snow
pointreyes_2008_08_14_100000.jpg	4	bad_image
pointreyes_2008_12_28_080400.jpg	4	bad_image
pointreyes_2009_03_19_130500.jpg	0	no_snow
pointreyes_2009_04_24_120500.jpg	0	no_snow
pointreyes_2010_01_25_140200.jpg	4	bad_image
pointreyes_2010_02_14_120400.jpg	0	no_snow
pointreyes_2010_07_26_120100.jpg	4	bad_image
pointreyes_2010_11_01_120200.jpg	0	no_snow
pointreyes_2011_01_02_120100.jpg	0	no_snow
pointreyes_2011_04_11_130100.jpg	0	no_snow
pointreyes_2011_06_06_110200.jpg	4	bad_image
pointreyes_2011_07_26_120000.jpg	4	bad_image
pointreyes_2011_08_21_120100.jpg	0	no_snow
pointreyes_2011_09_13_120146.jpg	4	bad_image
pointreyes_2012_03_22_120355.jpg	0	no_snow
pointreyes_2012_03_26_160302.jpg	0	no_snow
pointreyes_2013_03_10_120306.jpg	0	no_snow
pointreyes_2013_06_25_120339.jpg	4	bad_image
pointreyes_2013_12_18_120102.jpg	4	bad_image
pointreyes_2014_01_28_120052.jpg	4	bad_image
pointreyes_2014_02_28_120050.jpg	0	no_snow
pointreyes_2014_03_14_120055.jpg	0	no_snow
pointreyes_2014_04_23_120127.jpg	0	no_snow
pointreyes_2014_10_24_120042.jpg	0	no_snow
pointreyes_2014_11_04_120133.jpg	0	no_snow
proctor_2008_12_28_114639.jpg	3	snow_on_ground
proctor_2009_01_21_114635.jpg	2	snow_on_trees
proctor_2009_04_14_114636.jpg	0	no_snow
proctor_2009_05_15_114637.jpg	0	no_snow
proctor_2009_08_26_114638.jpg	0	no_snow
proctor_2009_09_25_114639.jpg	0	no_snow
proctor_2010_01_20_114639.jpg	2	snow_on_trees
proctor_2010_05_16_114638.jpg	0	no_snow
proctor_2010_06_09_114639.jpg	0	no_snow
proctor_2010_09_09_114639.jpg	0	no_snow
proctor_2010_10_23_114638.jpg	0	no_snow
proctor_2011_02_09_114638.jpg	2	snow_on_trees
proctor_2011_03_02_114638.jpg	3	snow_on_ground
proctor_2011_04_09_120140.jpg	3	snow_on_ground
proctor_2011_06_16_114639.jpg	0	no_snow
proctor_2012_01_25_120140.jpg	3	snow_on_ground
proctor_2012_02_01_114638.jpg	3	snow_on_ground
proctor_2012_04_16_121637.jpg	0	no_snow
proctor_2012_05_01_120139.jpg	0	no_snow
proctor_2012_08_05_120139.jpg	0	no_snow
proctor_2012_08_19_115236.jpg	0	no_snow
proctor_2012_09_11_114635.jpg	0	no_snow
proctor_2012_10_26_114637.jpg	0	no_snow
proctor_2013_01_16_114638.jpg	2	snow_on_trees
proctor_2013_04_04_114638.jpg	3	snow_on_ground
proctor_2013_06_22_114637.jpg	0	no_snow
proctor_2013_08_07_114639.jpg	0	no_snow
proctor_2014_03_20_114638.jpg	3	snow_on_ground
proctor_2014_05_28_114639.jpg	0	no_snow
proctor_2014_08_10_114640.jpg	0	no_snow
proctor_2014_09_04_114638.jpg	0	no_snow
proctor_2014_10_12_114638.jpg	0	no_snow
proctor_2014_12_02_114638.jpg	3	snow_on_ground
proctor_2014_12_19_114639.jpg	4	bad_image
queens_2008_07_12_120135.jpg	0	no_snow
queens_2008_10_11_120136.jpg	0	no_snow
queens_2009_04_14_120134.jpg	0	no_snow
queens_2009_10_13_070137.jpg	0	no_snow
queens_2010_04_12_063137.jpg	0	no_snow
queens_2010_04_30_120137.jpg	0	no_snow
queens_2010_10_09_120136.jpg	0	no_snow
queens_2010_10_24_123137.jpg	0	no_snow
queens_2011_03_01_120137.jpg	3	snow_on_ground
queens_2011_03_10_120137.jpg	3	snow_on_ground
queens_2011_03_20_090137.jpg	3	snow_on_ground
queens_2011_06_11_125038.jpg	0	no_snow
queens_2011_06_16_124326.jpg	0	no_snow
queens_2011_11_06_120138.jpg	0	no_snow
queens_2011_11_19_110136.jpg	0	no_snow
queens_2011_12_11_093137.jpg	3	snow_on_ground
queens_2012_05_02_120137.jpg	0	no_snow
queens_2012_08_01_120136.jpg	0	no_snow
queens_2013_01_07_120209.jpg	3	snow_on_ground
queens_2013_03_28_120138.jpg	3	snow_on_ground
queens_2013_07_28_120138.jpg	0	no_snow
queens_2013_12_01_120138.jpg	2	snow_on_trees
queens_2014_06_26_120004.jpg	0	no_snow
queens_2014_10_12_120007.jpg	0	no_snow
queens_2014_12_24_120007.jpg	3	snow_on_ground
quickbird_2014_11_16_120008.jpg	1	snow
readingma_2012_03_09_120103.jpg	0	no_snow
readingma_2012_07_13_120104.jpg	0	no_snow
readingma_2012_11_04_120104.jpg	0	no_snow
readingma_2013_03_26_120104.jpg	3	snow_on_ground
readingma_2013_05_12_113102.jpg	0	no_snow
readingma_2014_03_01_120103.jpg	3	snow_on_ground
readingma_2014_11_05_120106.jpg	0	no_snow
readingma_2014_11_06_120106.jpg	0	no_snow
russellsage_2014_02_15_121001.jpg	0	no_snow
russellsage_2014_06_21_121001.jpg	0	no_snow
russellsage_2014_07_26_121002.jpg	0	no_snow
russellsage_2014_11_17_121001.jpg	0	no_snow
sanford_2014_03_05_120104.jpg	3	snow_on_ground
sanford_2014_07_07_120104.jpg	0	no_snow
sedgwick_2008_10_06_120000.jpg	0	no_snow
sedgwick_2008_12_27_120000.jpg	0	no_snow
sedgwick_2009_04_07_120000.jpg	0	no_snow
sedgwick_2009_09_13_120000.jpg	0	no_snow
sedgwick_2009_11_23_120000.jpg	0	no_snow
sedgwick_2010_10_09_120000.jpg	0	no_snow
sedgwick_2011_01_16_120000.jpg	0	no_snow
sedgwick_2011_03_01_120000.jpg	0	no_snow
sedgwick_2011_03_09_120000.jpg	0	no_snow
sedgwick_2011_10_09_120000.jpg	0	no_snow
sedgwick_2011_11_12_120000.jpg	0	no_snow
sedgwick_2012_01_18_120000.jpg	0	no_snow
sedgwick_2012_07_24_120000.jpg	0	no_snow
sedgwick_2012_09_19_120000.jpg	0	no_snow
sedgwick_2012_09_27_120000.jpg	0	no_snow
sedgwick_2013_02_17_120000.jpg	0	no_snow
shahariya_2011_07_24_120000.jpg	0	no_snow
shahariya_2012_05_16_120000.jpg	0	no_snow
shahariya_2012_07_10_120000.jpg	0	no_snow
shahariya_2012_09_03_120000.jpg	0	no_snow
shahariya_2012_09_24_120000.jpg	0	no_snow
shahariya_2012_11_02_120000.jpg	0	no_snow
shahariya_2013_03_10_120000.jpg	0	no_snow
shalehillsczo_2012_07_10_120109.jpg	0	no_snow
shalehillsczo_2012_09_29_120103.jpg	0	no_snow
shalehillsczo_2012_10_22_120103.jpg	0	no_snow
shalehillsczo_2013_01_08_130102.jpg	3	snow_on_ground
shalehillsczo_2013_04_25_120104.jpg	0	no_snow
shalehillsczo_2013_05_15_130103.jpg	0	no_snow
shalehillsczo_2013_06_30_120104.jpg	0	no_snow
shalehillsczo_2013_09_05_120104.jpg	0	no_snow
shalehillsczo_2014_06_05_120104.jpg	0	no_snow
shalehillsczo_2014_08_10_120104.jpg	0	no_snow
shalehillsczo_2014_08_11_120105.jpg	0	no_snow
shenandoah_2010_10_09_120100.jpg	0	no_snow
shenandoah_2010_10_13_120200.jpg	0	no_snow
shenandoah_2010_12_07_120100.jpg	0	no_snow
shenandoah_2011_03_13_120100.jpg	0	no_snow
shenandoah_2012_02_10_120331.jpg	3	snow_on_ground
shenandoah_2012_05_10_120126.jpg	0	no_snow
shenandoah_2012_06_08_120142.jpg	0	no_snow
shenandoah_2013_04_03_120430.jpg	3	snow_on_ground
shenandoah_2013_12_23_120052.jpg	0	no_snow
shenandoah_2014_01_15_120102.jpg	0	no_snow
shenandoah_2014_06_27_130059.jpg	0	no_snow
shenandoah_2014_08_13_120128.jpg	0	no_snow
silaslittle_2012_04_07_120105.jpg	0	no_snow
silaslittle_2012_07_15_120103.jpg	0	no_snow
silaslittle_2012_11_10_120108.jpg	3	snow_on_ground
silaslittle_2013_06_23_120105.jpg	0	no_snow
silaslittle_2013_06_28_120103.jpg	0	no_snow
silaslittle_2013_07_17_120105.jpg	0	no_snow
silaslittle_2013_08_16_120104.jpg	0	no_snow
silverton_2013_08_17_120109.jpg	0	no_snow
silverton_2013_08_26_120111.jpg	0	no_snow
silverton_2014_03_04_120110.jpg	0	no_snow
silverton_2014_03_28_120115.jpg	0	no_snow
silverton_2014_06_12_120109.jpg	0	no_snow
silverton_2014_11_10_120111.jpg	0	no_snow
silverton_2014_12_10_120108.jpg	0	no_snow
smokylook_2000_11_29_150000.jpg	0	no_snow
smokylook_2000_12_17_150000.jpg	2	snow_on_trees
smokylook_2001_04_30_140000.jpg	0	no_snow
smokylook_2001_08_01_140000.jpg	0	no_snow
smokylook_2001_09_20_140000.jpg	0	no_snow
smokylook_2002_02_24_150000.jpg	0	no_snow
smokylook_2002_03_20_150000.jpg	4	bad_image
smokylook_2002_03_29_150000.jpg	0	no_snow
smokylook_2002_08_13_140000.jpg	0	no_snow
smokylook_2002_09_02_140000.jpg	0	no_snow
smokylook_2003_03_22_150000.jpg	0	no_snow
smokylook_2003_05_02_161500.jpg	0	no_snow
smokylook_2003_06_17_140000.jpg	0	no_snow
smokylook_2003_09_09_140000.jpg	0	no_snow
smokylook_2003_11_10_150000.jpg	0	no_snow
smokylook_2003_12_03_150000.jpg	0	no_snow
smokylook_2004_07_04_140000.jpg	0	no_snow
smokylook_2004_07_30_140000.jpg	0	no_snow
smokylook_2005_01_02_150000.jpg	0	no_snow
smokylook_2005_03_28_150000.jpg	4	bad_image
smokylook_2005_10_21_140000.jpg	0	no_snow
smokylook_2005_11_24_150000.jpg	0	no_snow
smokylook_2005_12_04_150000.jpg	4	bad_image
smokylook_2005_12_05_150000.jpg	4	bad_image
smokylook_2006_01_27_150000.jpg	0	no_snow
smokylook_2006_05_23_140000.jpg	0	no_snow
smokylook_2006_06_06_140000.jpg	0	no_snow
smokylook_2007_06_28_140000.jpg	0	no_snow
smokylook_2007_11_22_150000.jpg	4	bad_image
smokylook_2008_01_19_150000.jpg	0	no_snow
smokylook_2008_06_02_140000.jpg	0	no_snow
smokylook_2008_06_17_140000.jpg	0	no_snow
smokylook_2008_09_26_122100.jpg	0	no_snow
smokylook_2009_06_27_120200.jpg	0	no_snow
smokylook_2009_10_17_120400.jpg	4	bad_image
smokylook_2009_10_21_120600.jpg	0	no_snow
smokylook_2010_05_14_120200.jpg	0	no_snow
smokylook_2010_05_25_120200.jpg	0	no_snow
smokylook_2010_06_28_110100.jpg	0	no_snow
smokylook_2010_08_08_120100.jpg	0	no_snow
smokylook_2010_11_23_120100.jpg	4	bad_image
smokylook_2010_12_15_120100.jpg	2	snow_on_trees
smokylook_2011_02_03_120100.jpg	0	no_snow
smokylook_2011_05_06_120200.jpg	0	no_snow
smokylook_2011_11_07_120123.jpg	0	no_snow
smokylook_2011_12_14_120237.jpg	0	no_snow
smokylook_2012_07_29_130137.jpg	0	no_snow
smokylook_2012_08_14_120139.jpg	0	no_snow
smokylook_2012_12_18_120214.jpg	0	no_snow
smokylook_2013_01_04_120335.jpg	0	no_snow
smokylook_2013_01_08_120232.jpg	0	no_snow
smokylook_2013_03_02_120358.jpg	4	bad_image
smokylook_2013_06_18_120315.jpg	0	no_snow
smokylook_2013_08_12_120114.jpg	0	no_snow
smokylook_2013_12_28_120113.jpg	0	no_snow
smokylook_2014_07_11_120114.jpg	0	no_snow
smokylook_2014_09_14_120102.jpg	0	no_snow
smokypurchase_2003_12_22_150000.jpg	3	snow_on_ground
smokypurchase_2004_07_01_140000.jpg	0	no_snow
smokypurchase_2004_07_09_140000.jpg	0	no_snow
smokypurchase_2006_05_08_140000.jpg	0	no_snow
smokypurchase_2006_06_12_140000.jpg	0	no_snow
smokypurchase_2006_10_22_140000.jpg	0	no_snow
smokypurchase_2006_11_03_150000.jpg	0	no_snow
smokypurchase_2007_05_25_140000.jpg	0	no_snow
smokypurchase_2009_03_18_120500.jpg	0	no_snow
smokypurchase_2009_11_29_120300.jpg	0	no_snow
smokypurchase_2010_04_15_120500.jpg	0	no_snow
smokypurchase_2010_09_23_120200.jpg	0	no_snow
smokypurchase_2011_01_20_120200.jpg	3	snow_on_ground
smokypurchase_2011_04_23_120100.jpg	0	no_snow
smokypurchase_2011_04_26_120100.jpg	0	no_snow
smokypurchase_2011_05_21_120100.jpg	0	no_snow
smokypurchase_2011_09_22_120156.jpg	0	no_snow
smokypurchase_2011_12_27_121056.jpg	0	no_snow
smokypurchase_2012_09_10_120131.jpg	0	no_snow
smokypurchase_2013_08_01_120101.jpg	4	bad_image
smokypurchase_2013_09_26_120135.jpg	0	no_snow
smokypurchase_2013_12_26_120113.jpg	0	no_snow
smokypurchase_2014_05_15_120054.jpg	0	no_snow
smokypurchase_2014_06_15_120106.jpg	0	no_snow
smokypurchase_2014_10_05_130123.jpg	0	no_snow
snipelake_2010_10_15_120002.jpg	1	snow
snipelake_2010_12_07_120004.jpg	1	snow
snipelake_2010_12_18_120005.jpg	1	snow
snipelake_2011_01_27_120007.jpg	4	bad_image
snipelake_2011_05_23_120011.jpg	0	no_snow
snipelake_2011_06_02_120012.jpg	0	no_snow
snipelake_2011_06_25_120413.jpg	0	no_snow
snipelake_2012_04_02_120506.jpg	1	snow
snipelake_2012_08_13_115659.jpg	0	no_snow
snipelake_2012_08_23_115700.jpg	0	no_snow
snipelake_2012_09_07_115702.jpg	0	no_snow
snipelake_2012_09_21_115704.jpg	1	snow
snipelake_2013_03_26_115727.jpg	1	snow
snipelake_2013_07_10_120144.jpg	0	no_snow
snipelake_2013_08_03_120142.jpg	0	no_snow
snipelake_2013_09_20_120139.jpg	0	no_snow
southerngreatplains_2012_06_29_120103.jpg	0	no_snow
southerngreatplains_2012_07_16_120102.jpg	0	no_snow
southerngreatplains_2012_10_15_120103.jpg	0	no_snow
southerngreatplains_2012_10_29_120104.jpg	0	no_snow
southerngreatplains_2013_02_07_120105.jpg	0	no_snow
southerngreatplains_2013_02_24_120923.jpg	0	no_snow
southerngreatplains_2013_03_19_120106.jpg	0	no_snow
southerngreatplains_2013_03_22_120106.jpg	0	no_snow
southerngreatplains_2013_05_08_120105.jpg	0	no_snow
southerngreatplains_2013_06_18_120923.jpg	0	no_snow
southerngreatplains_2013_09_08_113104.jpg	0	no_snow
southerngreatplains_2013_10_12_120104.jpg	0	no_snow
southerngreatplains_2013_12_12_120109.jpg	0	no_snow
southerngreatplains_2014_01_24_120121.jpg	0	no_snow
southerngreatplains_2014_04_08_120107.jpg	0	no_snow
southerngreatplains_2014_06_21_120106.jpg	0	no_snow
southerngreatplains_2014_08_11_120113.jpg	0	no_snow
springfieldma_2012_04_13_120106.jpg	0	no_snow
springfieldma_2012_07_03_120106.jpg	0	no_snow
springfieldma_2013_01_19_120103.jpg	3	snow_on_ground
springfieldma_2013_06_06_120104.jpg	0	no_snow
springfieldma_2013_07_14_120105.jpg	0	no_snow
springfieldma_2013_07_22_120104.jpg	0	no_snow
springfieldma_2014_04_05_120104.jpg	0	no_snow
springfieldma_2014_05_15_120105.jpg	0	no_snow
springfieldma_2014_06_29_120923.jpg	0	no_snow
springfieldma_2014_07_21_120104.jpg	0	no_snow
springfieldma_2014_10_14_120105.jpg	0	no_snow
teddy_2003_03_06_140200.jpg	1	snow
teddy_2003_08_27_130200.jpg	0	no_snow
teddy_2004_02_14_140200.jpg	1	snow
teddy_2004_10_01_130200.jpg	0	no_snow
teddy_2004_11_23_140200.jpg	0	no_snow
teddy_2005_08_05_130000.jpg	0	no_snow
teddy_2006_01_28_140000.jpg	0	no_snow
teddy_2006_12_27_140000.jpg	0	no_snow
teddy_2007_04_15_130000.jpg	0	no_snow
teddy_2007_07_09_130000.jpg	0	no_snow
teddy_2007_08_30_130000.jpg	0	no_snow
teddy_2007_09_13_130000.jpg	0	no_snow
teddy_2007_10_29_130000.jpg	0	no_snow
teddy_2007_12_12_140000.jpg	1	snow
teddy_2008_02_29_140000.jpg	0	no_snow
teddy_2008_07_18_130000.jpg	0	no_snow
teddy_2009_02_09_120500.jpg	4	bad_image
teddy_2009_03_19_120400.jpg	1	snow
teddy_2009_07_04_120200.jpg	0	no_snow
teddy_2009_08_31_120300.jpg	0	no_snow
teddy_2009_11_22_120200.jpg	0	no_snow
teddy_2009_12_18_120700.jpg	1	snow
teddy_2010_04_19_120500.jpg	0	no_snow
teddy_2011_03_26_120100.jpg	1	snow
teddy_2011_10_13_120147.jpg	0	no_snow
teddy_2011_12_28_120219.jpg	0	no_snow
teddy_2012_01_05_120252.jpg	0	no_snow
teddy_2012_09_15_120159.jpg	0	no_snow
teddy_2012_09_17_120153.jpg	0	no_snow
teddy_2013_01_07_120241.jpg	1	snow
teddy_2013_05_16_120424.jpg	4	bad_image
teddy_2013_07_20_100515.jpg	0	no_snow
teddy_2014_04_13_120106.jpg	0	no_snow
teddy_2014_06_17_120129.jpg	0	no_snow
teddy_2014_07_10_120124.jpg	0	no_snow
thompsonfarm2N_2009_01_12_122100.jpg	2	snow_on_trees
thompsonfarm2N_2009_02_09_120500.jpg	0	no_snow
thompsonfarm2N_2009_05_11_120500.jpg	0	no_snow
thompsonfarm2N_2009_05_17_120500.jpg	0	no_snow
thompsonfarm2N_2009_06_30_120400.jpg	0	no_snow
thompsonfarm2N_2009_07_09_120200.jpg	0	no_snow
thompsonfarm2N_2009_08_25_120200.jpg	0	no_snow
thompsonfarm2N_2009_10_21_120600.jpg	0	no_snow
thompsonfarm2N_2009_10_25_120300.jpg	0	no_snow
thompsonfarm2N_2010_09_01_120100.jpg	0	no_snow
thompsonfarm2N_2010_09_16_120100.jpg	0	no_snow
thompsonfarm2N_2010_12_05_120100.jpg	0	no_snow
thompsonfarm2N_2011_03_10_120100.jpg	4	bad_image
thompsonfarm2N_2011_05_05_120200.jpg	0	no_snow
thompsonfarm2N_2011_09_19_120153.jpg	0	no_snow
thompsonfarm2N_2011_09_23_120137.jpg	0	no_snow
thompsonfarm2N_2011_11_12_120138.jpg	0	no_snow
thompsonfarm2N_2011_12_19_120307.jpg	0	no_snow
thompsonfarm2N_2012_03_20_120358.jpg	0	no_snow
thompsonfarm2N_2012_03_30_120254.jpg	0	no_snow
thompsonfarm2N_2012_08_07_120150.jpg	0	no_snow
thompsonfarm2N_2012_09_27_120217.jpg	0	no_snow
thompsonfarm2N_2013_05_21_120549.jpg	0	no_snow
thompsonfarm2N_2013_08_30_120147.jpg	0	no_snow
thompsonfarm2N_2014_02_19_120111.jpg	2	snow_on_trees
thompsonfarm2N_2014_03_11_120924.jpg	3	snow_on_ground
tonzi_2012_01_28_120103.jpg	0	no_snow
tonzi_2012_03_28_120102.jpg	0	no_snow
tonzi_2012_06_02_120101.jpg	0	no_snow
tonzi_2012_06_12_120101.jpg	0	no_snow
tonzi_2012_06_26_120102.jpg	0	no_snow
tonzi_2012_07_15_120103.jpg	0	no_snow
tonzi_2012_10_18_113102.jpg	0	no_snow
tonzi_2013_01_05_120102.jpg	0	no_snow
tonzi_2013_01_30_120102.jpg	0	no_snow
tonzi_2013_03_05_123102.jpg	0	no_snow
tonzi_2013_04_20_120105.jpg	0	no_snow
tonzi_2013_07_16_120102.jpg	0	no_snow
tonzi_2013_09_21_120102.jpg	0	no_snow
tonzi_2014_01_17_120103.jpg	0	no_snow
tonzi_2014_07_01_120101.jpg	0	no_snow
tonzi_2014_11_04_120103.jpg	0	no_snow
tonzi_2014_11_19_120102.jpg	0	no_snow
tonzi_2014_12_21_113102.jpg	0	no_snow
torgnon-ld_2012_04_04_120000.jpg	2	snow_on_trees
torgnon-ld_2012_07_21_120000.jpg	0	no_snow
torgnon-ld_2012_08_10_120000.jpg	0	no_snow
torgnon-ld_2012_10_20_110000.jpg	0	no_snow
torgnon-ld_2012_11_10_120000.jpg	2	snow_on_trees
torgnon-ld_2013_07_16_120000.jpg	0	no_snow
torgnon-ld_2013_08_22_120000.jpg	0	no_snow
torgnon-ld_2014_02_17_120000.jpg	2	snow_on_trees
torgnon-ld_2014_04_02_120000.jpg	3	snow_on_ground
torgnon-ld_2014_04_09_120000.jpg	3	snow_on_ground
torgnon-ld_2014_07_14_120000.jpg	0	no_snow
torgnon-ld_2014_10_21_120000.jpg	0	no_snow
torgnon-ld_2014_11_07_120000.jpg	3	snow_on_ground
torgnon-nd_2011_02_12_140000.jpg	3	snow_on_ground
torgnon-nd_2011_06_26_120000.jpg	0	no_snow
torgnon-nd_2011_09_18_120000.jpg	0	no_snow
torgnon-nd_2013_09_21_120000.jpg	0	no_snow
torgnon-nd_2014_11_23_120000.jpg	3	snow_on_ground
turkeypointdbf_2012_06_14_120115.jpg	0	no_snow
turkeypointdbf_2013_02_23_120114.jpg	3	snow_on_ground
turkeypointdbf_2013_07_03_120113.jpg	0	no_snow
turkeypointdbf_2013_09_08_120304.jpg	0	no_snow
turkeypointdbf_2013_11_27_120112.jpg	2	snow_on_trees
turkeypointdbf_2013_12_01_120110.jpg	3	snow_on_ground
turkeypointdbf_2013_12_04_120110.jpg	0	no_snow
turkeypointenf02_2012_08_10_120130.jpg	0	no_snow
turkeypointenf02_2012_09_09_120130.jpg	0	no_snow
turkeypointenf02_2012_09_13_113128.jpg	0	no_snow
turkeypointenf02_2012_10_25_120130.jpg	0	no_snow
turkeypointenf02_2013_06_16_120130.jpg	0	no_snow
turkeypointenf02_2013_12_04_120129.jpg	3	snow_on_ground
turkeypointenf02_2013_12_31_113128.jpg	2	snow_on_trees
turkeypointenf02_2014_01_21_120129.jpg	3	snow_on_ground
turkeypointenf02_2014_02_14_113128.jpg	3	snow_on_ground
turkeypointenf02_2014_03_06_120130.jpg	3	snow_on_ground
turkeypointenf02_2014_04_11_120130.jpg	0	no_snow
turkeypointenf02_2014_04_22_120130.jpg	0	no_snow
turkeypointenf39_2012_05_23_120125.jpg	0	no_snow
turkeypointenf39_2012_10_25_120110.jpg	0	no_snow
turkeypointenf39_2012_11_27_120110.jpg	3	snow_on_ground
turkeypointenf39_2013_01_28_073119.jpg	2	snow_on_trees
turkeypointenf39_2013_02_16_120108.jpg	3	snow_on_ground
turkeypointenf39_2013_04_27_120109.jpg	0	no_snow
turkeypointenf39_2013_09_27_120112.jpg	0	no_snow
turkeypointenf39_2013_12_14_120110.jpg	2	snow_on_trees
turkeypointenf39_2014_01_25_120116.jpg	2	snow_on_trees
turkeypointenf39_2014_02_01_120111.jpg	2	snow_on_trees
turkeypointenf39_2014_02_15_120110.jpg	3	snow_on_ground
turkeypointenf39_2014_06_01_120116.jpg	0	no_snow
turkeypointenf39_2014_11_13_120111.jpg	0	no_snow
turkeypointenf39_2014_12_04_120303.jpg	0	no_snow
turkeypointenf74_2012_04_08_120114.jpg	0	no_snow
turkeypointenf74_2012_09_11_120108.jpg	0	no_snow
turkeypointenf74_2012_11_24_120108.jpg	3	snow_on_ground
turkeypointenf74_2013_05_04_120109.jpg	0	no_snow
turkeypointenf74_2013_08_01_120110.jpg	0	no_snow
turkeypointenf74_2013_09_28_120108.jpg	0	no_snow
turkeypointenf74_2013_10_03_120146.jpg	0	no_snow
turkeypointenf74_2013_11_01_120110.jpg	0	no_snow
turkeypointenf74_2014_01_01_120111.jpg	0	no_snow
turkeypointenf74_2014_02_15_120109.jpg	0	no_snow
turkeypointenf74_2014_03_31_120111.jpg	0	no_snow
uiefmaize_2008_11_15_115924.jpg	0	no_snow
uiefmaize_2008_11_21_115937.jpg	0	no_snow
uiefmaize_2008_12_24_113950.jpg	1	snow
uiefmaize_2009_05_06_113857.jpg	0	no_snow
uiefmaize_2009_07_30_121848.jpg	0	no_snow
uiefmaize_2009_11_23_122200.jpg	0	no_snow
uiefmaize_2009_12_15_114027.jpg	0	no_snow
uiefmaize_2010_07_02_122959.jpg	0	no_snow
uiefmaize_2010_08_28_113022.jpg	0	no_snow
uiefmaize_2010_09_14_113055.jpg	0	no_snow
uiefmaize_2010_11_15_113134.jpg	0	no_snow
uiefmaize_2011_02_08_114739.jpg	1	snow
uiefmaize_2011_03_31_114802.jpg	0	no_snow
uiefmaize_2011_06_02_113353.jpg	0	no_snow
uiefmaize_2011_07_31_113826.jpg	0	no_snow
uiefmaize_2011_10_03_114050.jpg	0	no_snow
uiefmaize_2012_07_08_120000.jpg	0	no_snow
uiefmaize_2013_10_02_120000.jpg	0	no_snow
uiefmiscanthus_2009_07_12_121841.jpg	0	no_snow
uiefmiscanthus_2009_10_12_122132.jpg	0	no_snow
uiefmiscanthus_2010_02_01_122249.jpg	1	snow
uiefmiscanthus_2010_02_16_122256.jpg	1	snow
uiefmiscanthus_2010_09_22_122055.jpg	0	no_snow
uiefmiscanthus_2010_10_20_122102.jpg	0	no_snow
uiefmiscanthus_2011_10_06_113820.jpg	0	no_snow
uiefmiscanthus_2012_01_28_120711.jpg	1	snow
uiefmiscanthus_2012_04_07_120000.jpg	0	no_snow
uiefmiscanthus_2012_06_02_120000.jpg	0	no_snow
uiefmiscanthus_2012_06_12_120000.jpg	0	no_snow
uiefmiscanthus_2013_01_03_120000.jpg	1	snow
uiefmiscanthus_2013_01_23_120000.jpg	0	no_snow
uiefmiscanthus_2013_04_03_120000.jpg	0	no_snow
uiefmiscanthus_2013_10_15_120000.jpg	0	no_snow
uiefmiscanthus_2014_01_12_120000.jpg	1	snow
uiefmiscanthus_2014_06_21_120000.jpg	0	no_snow
uiefmiscanthus_2014_07_31_120000.jpg	0	no_snow
uiefmiscanthus_2014_09_16_120000.jpg	0	no_snow
uiefmiscanthus_2014_12_19_120000.jpg	0	no_snow
uiefprairie_2008_11_21_115907.jpg	0	no_snow
uiefprairie_2008_11_24_115908.jpg	0	no_snow
uiefprairie_2008_12_16_115913.jpg	1	snow
uiefprairie_2009_01_17_113956.jpg	1	snow
uiefprairie_2009_02_06_114006.jpg	1	snow
uiefprairie_2009_03_08_121122.jpg	0	no_snow
uiefprairie_2009_03_18_120256.jpg	0	no_snow
uiefprairie_2009_04_14_121036.jpg	0	no_snow
uiefprairie_2009_06_03_120723.jpg	0	no_snow
uiefprairie_2009_06_05_120723.jpg	0	no_snow
uiefprairie_2010_05_21_122203.jpg	0	no_snow
uiefprairie_2010_06_03_122205.jpg	0	no_snow
uiefprairie_2010_12_02_113512.jpg	0	no_snow
uiefprairie_2011_03_14_114743.jpg	0	no_snow
uiefprairie_2011_03_27_114745.jpg	0	no_snow
uiefprairie_2011_03_31_114747.jpg	0	no_snow
uiefprairie_2011_07_04_113749.jpg	0	no_snow
uiefprairie_2011_09_27_113808.jpg	0	no_snow
uiefprairie_2012_03_15_120000.jpg	0	no_snow
uiefprairie_2012_04_09_120000.jpg	0	no_snow
uiefprairie_2012_04_13_120000.jpg	0	no_snow
uiefprairie_2012_09_24_120000.jpg	0	no_snow
uiefprairie_2013_04_30_120000.jpg	0	no_snow
uiefprairie_2014_02_16_120000.jpg	1	snow
uiefprairie_2014_09_15_120000.jpg	0	no_snow
uiefprairie_2014_09_30_120000.jpg	0	no_snow
uiefswitchgrass_2009_01_10_113951.jpg	4	bad_image
uiefswitchgrass_2009_02_26_113200.jpg	0	no_snow
uiefswitchgrass_2009_07_14_121845.jpg	0	no_snow
uiefswitchgrass_2010_01_08_122127.jpg	1	snow
uiefswitchgrass_2010_04_13_122141.jpg	0	no_snow
uiefswitchgrass_2010_04_14_122146.jpg	0	no_snow
uiefswitchgrass_2010_08_10_113010.jpg	0	no_snow
uiefswitchgrass_2010_09_05_113016.jpg	0	no_snow
uiefswitchgrass_2011_06_15_121926.jpg	0	no_snow
uiefswitchgrass_2011_09_24_113825.jpg	0	no_snow
uiefswitchgrass_2011_10_16_113838.jpg	0	no_snow
uiefswitchgrass_2012_02_29_120000.jpg	0	no_snow
uiefswitchgrass_2012_04_02_120000.jpg	0	no_snow
uiefswitchgrass_2012_07_07_120000.jpg	0	no_snow
uiefswitchgrass_2012_08_12_120000.jpg	0	no_snow
uiefswitchgrass_2012_12_02_120000.jpg	0	no_snow
uiefswitchgrass_2012_12_24_120000.jpg	1	snow
uiefswitchgrass_2013_06_18_120000.jpg	0	no_snow
uiefswitchgrass_2013_08_22_120000.jpg	0	no_snow
uiefswitchgrass_2013_10_20_120000.jpg	0	no_snow
uiefswitchgrass_2014_03_15_120000.jpg	0	no_snow
uiefswitchgrass_2014_07_19_120000.jpg	0	no_snow
uiefswitchgrass_2014_09_13_120000.jpg	0	no_snow
uiefswitchgrass_2014_11_20_120000.jpg	0	no_snow
umichbiological_2008_09_23_120136.jpg	0	no_snow
umichbiological_2008_10_15_120136.jpg	0	no_snow
umichbiological_2008_12_29_120135.jpg	2	snow_on_trees
umichbiological_2009_03_14_120136.jpg	3	snow_on_ground
umichbiological_2009_07_12_120135.jpg	0	no_snow
umichbiological_2009_10_21_120126.jpg	0	no_snow
umichbiological_2009_12_04_113127.jpg	2	snow_on_trees
umichbiological_2010_07_20_113128.jpg	0	no_snow
umichbiological_2010_09_30_120126.jpg	0	no_snow
umichbiological_2011_02_02_120125.jpg	3	snow_on_ground
umichbiological_2011_02_04_120126.jpg	3	snow_on_ground
umichbiological_2011_03_17_120126.jpg	3	snow_on_ground
umichbiological_2012_01_08_120126.jpg	3	snow_on_ground
umichbiological_2013_11_09_120126.jpg	3	snow_on_ground
umichbiological_2014_02_06_120126.jpg	3	snow_on_ground
umichbiological_2014_03_30_120004.jpg	3	snow_on_ground
umichbiological_2014_04_13_120003.jpg	3	snow_on_ground
umichbiological_2014_04_25_120003.jpg	3	snow_on_ground
umichbiological_2014_11_01_120003.jpg	4	bad_image
umichbiological_2014_12_17_120004.jpg	2	snow_on_trees
umichbiological2_2009_02_04_120136.jpg	2	snow_on_trees
umichbiological2_2010_01_13_120126.jpg	3	snow_on_ground
umichbiological2_2010_03_03_113128.jpg	3	snow_on_ground
umichbiological2_2010_04_12_120126.jpg	0	no_snow
umichbiological2_2010_04_16_113128.jpg	0	no_snow
umichbiological2_2010_09_12_120126.jpg	0	no_snow
umichbiological2_2010_11_07_120125.jpg	0	no_snow
umichbiological2_2010_12_07_120126.jpg	3	snow_on_ground
umichbiological2_2010_12_15_120126.jpg	2	snow_on_trees
umichbiological2_2011_02_07_120126.jpg	3	snow_on_ground
umichbiological2_2012_01_31_120126.jpg	2	snow_on_trees
umichbiological2_2012_03_08_120128.jpg	3	snow_on_ground
umichbiological2_2013_04_10_113129.jpg	3	snow_on_ground
umichbiological2_2013_04_21_120127.jpg	3	snow_on_ground
umichbiological2_2013_10_28_120126.jpg	0	no_snow
umichbiological2_2013_12_04_120128.jpg	2	snow_on_trees
umichbiological2_2013_12_13_120126.jpg	2	snow_on_trees
umichbiological2_2013_12_31_120127.jpg	2	snow_on_trees
umichbiological2_2014_01_23_120125.jpg	2	snow_on_trees
umichbiological2_2014_05_10_113007.jpg	0	no_snow
umichbiological2_2014_07_04_120005.jpg	0	no_snow
umichbiological2_2014_07_05_120005.jpg	0	no_snow
umichbiological2_2014_07_10_120004.jpg	0	no_snow
umichbiological2_2014_08_25_113006.jpg	0	no_snow
umichbiological2_2014_09_11_120003.jpg	0	no_snow
umichbiological2_2014_12_22_120003.jpg	3	snow_on_ground
usgsreston_2012_05_24_120155.jpg	0	no_snow
usgsreston_2012_08_26_120147.jpg	0	no_snow
usgsreston_2013_05_19_120318.jpg	0	no_snow
usgsreston_2013_07_09_120258.jpg	0	no_snow
usgsreston_2013_07_12_120254.jpg	0	no_snow
usgsreston_2013_07_18_120217.jpg	0	no_snow
usgsreston_2014_01_07_120117.jpg	0	no_snow
usmpj_2014_02_09_120107.jpg	3	snow_on_ground
usmpj_2014_04_23_120110.jpg	0	no_snow
usmpj_2014_08_13_120109.jpg	0	no_snow
usmpj_2014_09_26_120109.jpg	0	no_snow
usmpj_2014_12_06_120107.jpg	0	no_snow
uwmfieldsta_2014_01_03_120108.jpg	3	snow_on_ground
uwmfieldsta_2014_12_04_120109.jpg	3	snow_on_ground
vaira_2009_07_17_120200.jpg	0	no_snow
vaira_2009_08_17_120200.jpg	0	no_snow
vaira_2009_08_23_120200.jpg	0	no_snow
vaira_2010_06_18_120200.jpg	0	no_snow
vaira_2010_11_20_120200.jpg	0	no_snow
vaira_2011_11_24_120103.jpg	0	no_snow
vaira_2012_09_12_120102.jpg	0	no_snow
vaira_2013_02_13_120109.jpg	0	no_snow
vaira_2013_03_06_113108.jpg	0	no_snow
vaira_2013_06_27_120104.jpg	0	no_snow
vaira_2013_10_02_120104.jpg	0	no_snow
vaira_2014_02_16_120104.jpg	0	no_snow
vaira_2014_05_30_120103.jpg	0	no_snow
[truncated: 14 more rows]
