# Supplementary material for: Integrating camera imagery, crowdsourcing, and deep learning to improve high-frequency automated monitoring of snow at continental-to-global scales
Source: PLoS One. 2018 Dec 27;13(12):e0209649. doi: 10.1371/journal.pone.0209649 (PMC6307743; doi:10.1371/journal.pone.0209649)
Supplement: S4 Table — (CSV) [file pone.0209649.s004.csv]

0.091672645
-0.019082473
-0.018966604
0.159419267
0.094100438
-0.128599625
0.109159794
0.043968236
-0.063745918
0.052571958
0.060949758
0.049225487
0.033424021
0.024690413
-0.173180761
-0.039488537
0.069340637
0.046149804
0.008457075
0.02925975
-0.035942069
-0.110284465
-0.016174437
-0.14775945
-0.000513511
-0.008917803
-0.127637052
-0.117346741
0.082022719
-0.073724041
0.075930856
0.145255628
-0.087911518
0.147804886
0.018455925
0.055628862
0.098933053
0.20715296
-0.020282074
-0.057758603
0.000120374
0.07671566
0.008312599
0.053426426
-0.086468952
-0.110064292
0.031657582
-0.067415854
0.168629615
0.051975002
-0.229525534
0.037858637
0.09829049
0.039759086
-0.083277513
0.091673566
-0.184556372
-0.144950362
0.107864767
0.16819648
0.15539182
0.016482207
0.148099931
0.008598133
0.049275188
0.058126573
0.109644313
-0.14346883
-0.062016186
-0.057565333
-0.074417162
0.040651313
-0.088074826
0.084565392
-0.007744005
-0.024606273
-0.01470791
0.053051453
0.071174651
-0.038333306
-0.01585972
0.07803554
0.043079544
-0.257415776
-0.113677756
-0.150154585
-0.146300594
0.082658229
-0.048684001
0.005604002
0.068951839
0.06283499
0.009779115
0.128990485
-0.030304969
0.091982365
-0.030358794
-0.068804557
0.06350918
0.141084805
-0.047382913
0.082845806
-0.002530331
0.059716798
-0.139621692
-0.073413013
0.10997265
0.110714103
-0.078193372
0.079746435
-0.217557841
0.034401554
0.04432776
-0.008429122
0.15035139
-0.131814286
0.056627248
-0.19101842
-0.116649557
0.055864767
0.198580292
-0.091366814
0.010118407
-0.001618936
-0.03583801
0.190717064
0.08321589
-0.000991497
0.013074935
0.072628359
0.019449558
0.114840242
-0.011806349
-0.141613602
-0.092032406
0.007389184
0.059043855
0.091199614
-0.012272886
-0.013579002
0.085224864
-0.06276253
0.025335983
0.134008494
-0.045948138
0.134131829
-0.024366433
-0.103845798
0.094552285
-0.104883045
-0.006822259
-0.174739929
-0.019425262
-0.001705895
0.078909013
0.071498515
0.031833647
0.013171986
0.031707816
0.095376275
-0.064997299
0.04237484
0.082102675
0.066257342
0.001880155
0.00752544
0.038234159
0.09728347
-0.03754661
-0.027414042
-0.101941445
-0.094447948
0.168174375
-0.11353334
-0.039452298
0.043339571
0.068333713
0.077465333
0.000841727
-0.015137776
-0.059528063
-0.0472251
-0.027455847
-0.145073469
0.06841791
0.055160836
-0.012011442
0.003191257
-0.015239507
-0.119567534
-0.01374723
0.081428146
0.090291398
0.089104691
0.232141195
0.077991297
0.08266655
-0.077646778
0.037405932
0.07572248
0.063443654
-0.042606604
0.025003882
0.116583904
0.00190557
0.067883527
0.051362417
-0.055814002
0.178407151
0.014448602
-0.169969534
0.008279449
-0.032922843
0.104695256
-0.098056582
-0.202607608
-0.011713343
-0.060392588
-0.088694407
-0.033249897
0.080711998
-0.010355463
-0.066728912
-0.028952624
-0.076880128
0.040191316
0.137729401
-0.085345998
0.028606506
0.02233145
-0.018786551
0.055725257
0.08117313
-0.022987018
-0.070919173
-0.052852959
0.147109282
0.144377139
-0.018235273
0.058619243
-0.146829773
0.176019617
-0.020652943
-0.068426108
-0.122842183
-0.222202303
-0.029829591
0.007966539
-0.095771951
0.210105154
-0.087389355
-0.207891025
-0.062565679
-0.077375942
-0.042426779
-0.010400906
0.061038039
-0.020017821
0.089069317
0.001152993
0.121499526
-0.047808709
-0.028513624
0.058566124
0.026786048
0.104954379
-0.184879298
-0.115586419
-0.032475086
-0.028674082
-0.015589509
-0.152956827
0.178879616
-0.087340421
-0.147016379
0.191497113
-0.034864845
0.21364973
-0.105328239
-0.099766436
-0.011023634
-0.030667649
-0.061964617
-0.216057807
0.017517576
-0.069520015
0.10082926
0.015829342
-0.045311863
0.054624743
0.078894906
-0.214334741
0.049056995
0.00956752
0.086205406
0.079421924
-0.107800059
0.212032951
-0.057892722
0.131398345
-0.036255513
-0.084004063
-0.039594925
-0.008676009
0.076299371
0.084544287
-0.038409139
-0.093172995
0.060925742
0.027123552
-0.057277582
0.078570572
-0.008295239
-0.247693358
-0.105895868
0.075650524
-0.008582175
-0.006610351
-0.001208971
0.046664256
-0.023161036
0.056478971
0.029446035
0.016780329
0.0848573
0.324735599
-0.00388053
0.079235653
-0.010161115
-0.091322726
0.121814415
-0.102801835
0.042061801
0.094773269
0.035862667
0.004184529
-0.011428085
0.075055627
0.109761716
0.009470381
-0.159246361
-0.019392091
-0.068455392
0.020560714
-0.071085274
0.076237184
0.006262672
0.070144129
-0.046321456
0.159696371
-0.149351436
0.01483378
-0.220219989
0.129796638
-0.195609166
0.171208433
0.052135507
0.105571171
-0.050797227
0.025147229
0.015524555
0.002689129
0.113266425
0.057908619
0.145723038
-0.056969375
-0.000567212
0.002979291
-0.104558647
-0.074691583
-0.174166251
0.051072834
0.10748751
-0.203686916
-0.091308808
0.008918679
0.150924559
0.177861288
-0.039186422
0.099079357
0.078392305
-0.094772195
0.023442209
0.074347067
-0.031110964
0.084556675
0.019759666
-0.130972967
-0.08441478
-0.149273338
-0.145423939
0
-0.017064318
-0.077311486
0.038995778
-0.082929312
0.053721568
-0.062505039
-0.086706684
-0.03247995
-0.063726028
-0.123026056
-0.04810678
0.164987362
0.018827167
-0.245093842
-0.047323991
-0.016730509
0.093197043
0.057405322
-0.058483368
-0.068382347
0.099588528
0.034588241
0.028576505
-0.027369836
0.222346448
-0.030203609
0.000951306
-0.028659661
-0.124540611
0.0087823
-0.000265363
0.039917173
-0.045973398
0.072651382
0.131469066
0.008108085
0.048248398
0.157950749
0.002541834
-0.120607825
-0.081347907
0.016940085
-0.086000667
-0.188297843
0.023364916
0.094535866
0.040379962
0.020451604
0.065215629
-0.093759462
-0.069869598
0.115871937
-0.024534418
-0.126412791
-0.066506348
0.002367894
0.048016456
-0.161053876
0.108587945
-0.132866819
-0.011324931
-0.029667117
0.121627751
0.113323851
0.11818992
-0.036658496
0.020899112
0.067316303
-0.03392151
0.138915931
-0.002990705
0.158963544
-0.172197437
0.088815957
-0.01540216
0.055525544
-0.132174654
0.001368251
-0.021307456
0.011499583
-0.077964991
-0.009774696
-0.15432313
-0.013541301
0.165701246
-0.093401026
0.025132763
0.137009073
0.04319409
-0.122966117
0.073322987
-0.012370411
-0.013531896
0.05697244
0.161857633
0.084385509
-0.08354695
-0.040291876
0.006286369
-0.014981026
0.164286425
0.088663628
-0.015961612
-0.137029715
0.081335214
-0.033699725
0.017351703
0.082781589
0.088427522
0.036015041
-0.031499455
-0.086650186
-0.006905482
0.028555236
-0.105115368
0.012805969
0.118688997
-0.052978249
0.069112089
0.021614572
0.102634784
0.045466805
-0.031227685
-0.058512793
0.038294107
0.076849611
-0.277863245
0.017786629
0.042822948
0.048063914
0.076636643
-0.15401055
0.113388362
-0.071932787
-0.098887462
-0.031900411
-0.129859075
0.019897588
-0.013426568
0.121099005
-0.000124459
0.092472175
0.128258227
-0.092964039
0.021839593
-0.099364855
-0.012514527
0.07230064
0.062117032
0.010365493
-0.210021915
0.036872507
0.024744926
-0.032749075
-0.034439861
-0.12483048
0.027080909
0.022782866
-0.123473606
0.059350981
0.051104014
0.106886372
-0.08358878
-0.046061482
-0.042850883
-0.065276887
0.056739067
0.050444741
-0.08646955
-0.166523442
-0.04322603
-0.022132186
-0.06814903
0.001756457
-0.110822955
-0.011949476
-0.020559982
0.031083617
0.031261216
0.126576698
-0.108189937
-0.032355407
-0.095366017
0.139490808
-0.121252934
-0.039883553
-0.083231656
0.109507899
0.089554262
0.164178616
0.06057815
0.016349211
-0.061645219
0.092934558
0.017038819
0.052874331
-0.025022593
-0.102191986
0.095721734
0.094734658
0.005831972
-0.22692244
0.028628404
-0.05594706
-0.098585524
-0.060719963
-0.072478394
-0.176769807
-0.093455353
-0.065716273
0.147707603
-0.015678506
-0.02536326
-0.000178872
0.255243376
-0.008622926
0.158550926
0.019892951
0.039025274
-0.114100013
-0.045131118
-0.019799977
-0.01117265
0.093683081
-0.088237115
-0.119934168
0.031550689
-0.290740656
-0.046488001
-0.09187456
0.019393395
0.036267016
0.075039848
-0.055526961
-0.062887919
-0.011527585
-0.020526479
0.043089601
0.013449967
0.036926805
-0.012045652
-0.167631033
0.01551822
0.029293219
-0.042406245
0.097968429
0.01737717
0.042494227
-0.156392547
-0.078342391
-0.076731534
-0.00176642
0.055117771
-0.066590068
0.060376037
0.061628309
0.072498572
-0.05618757
0.0951939
0.109924778
-0.111356217
0.007186927
-0.029585077
-0.075227699
-0.105711495
0.05501884
-0.030607175
0.048790376
-0.115103643
-0.191664841
-0.014969066
-0.014306753
0.085518456
0.051043113
0.048159744
-0.028194154
-0.052452182
-0.253090651
-0.047682722
-0.026103054
0.140395331
0.098153499
0.057264232
-0.037688597
-0.106103458
0.117887549
-0.105276638
0.080452832
0.039928067
0.040665828
0.025980341
-0.033883398
-0.115215129
0.127105161
-0.086771785
0.10928316
0.047082114
-0.04993327
0.018312866
-0.0506135
0.063613169
0.042485948
0.064197749
0.076949467
0.107950356
-0.076553868
-0.039184804
0.041643674
-0.204902626
0.100405707
-0.139900117
0.052333937
-0.106958206
0.063811778
-0.208897657
-0.04307999
0.116013146
0.138837199
-0.082398052
0.325892505
0.048119046
-0.01970935
-0.129991802
0.078977319
-0.089513605
0.045743353
0.059613305
0.118094091
-0.119738503
-0.129008569
-0.207599785
-0.096119675
0.120340587
0.020241744
-0.024456294
-0.016220182
0.035767823
-0.124482961
0.011310661
-0.040839196
-0.028612064
0.005138257
0.118825828
-0.048658511
0.026770219
0.036094762
0.048073831
-0.016174813
0.031225555
0.186828662
0.037352662
-0.197052774
-0.00784579
0.002320493
-0.079920235
-0.204712696
0.070307935
-0.145395803
0.027444463
0.005531309
0.023710375
-0.175515427
-0.032872115
-0.020808474
0.027659193
0.018930223
-0.037657417
0.210050086
0.132834475
-0.088579841
-0.020384136
0.108928291
0.028342304
0.039695563
0.009905924
0.067603107
-0.03173348
0.022741977
-0.057918467
0.129067602
0.011811856
-0.125336997
0.007437616
-0.123938027
-0.02966302
0.22434426
-0.100593391
0.006290647
-0.071063567
-0.011619096
0.053442118
0.129521688
-0.068914308
0.056267201
-0.010858392
-0.023491236
0.14440412
0.110287051
0.092672483
0.033248918
-0.093358755
0.09709262
-0.141105867
0.088811051
0.109600529
-0.037382015
-0.06159246
0.152677883
0.109135118
0.02328816
-0.070041094
-0.076840324
-0.063940993
-0.111017474
-0.075413282
-0.087115365
-0.009816307
0.097749215
-0.079015767
-0.022387356
0.089786415
0.049500739
-0.167370553
0.115679964
0.12391298
-0.037817142
-0.066097133
-0.042011519
0.000383379
0.081156644
-0.072625186
-0.094100133
-0.05568391
0.139710837
0.147620045
-0.052975764
0.137250431
0.019953097
0.059637158
0.039189607
0.110369542
0.020105698
-0.08257284
0.365072091
-0.048472769
-0.04838316
-0.121181211
0.029760913
-0.066071338
-0.027519881
0.087393936
-0.13688781
0.075926799
-0.108529598
-0.041181956
-0.0190586
-0.027017068
-0.043460724
-0.048899183
-0.016869074
0.035869422
-0.210811325
-0.019801831
-0.010735841
-0.024280527
-0.018601491
-0.069935685
-0.116480371
-0.033638335
0.004150715
0.058802439
0.058255957
0.119266829
0.0193674
0.10511583
-0.059187921
-0.084398932
-0.057507537
0.007524222
0.123379923
0.052166918
0.05057419
0.001707939
-0.098946687
-0.104784046
0.076699116
-0.008838212
0.023397765
0.058312025
-0.092303565
-0.172852541
0.024504901
0.034665695
-0.110688957
-0.030441822
0.070380476
0.168154472
-0.108560937
-0.027226939
0.175436421
0.013481625
-0.122714439
0.050561384
0.055828415
0.007874159
0.086960021
-0.080562982
0.090303346
-0.069792753
0.029776785
0.069202483
0.025449256
0.013341666
0.039913908
0.072181833
0.107700797
-0.170373595
-0.019025617
-0.089436665
-0.090086036
0.041092582
0.031583531
0.045636784
-0.048484298
-0.114773375
-0.142216919
-0.055411966
0.044991845
0.159456826
0.001445156
0.13394293
0.026091101
0.115069026
-0.061062653
0.086500928
0.087276376
-0.024973196
-0.087850963
-0.014249848
0.036574548
0.18857512
-0.042911901
-0.033994979
0.115128942
0.072989278
-0.033531271
-0.006755463
-0.065824542
0.022182115
0.116373907
0.094534078
0.160202487
0.011390191
0.125819031
0.086752822
-0.047936158
0.128377941
0.042063055
0.069676794
-0.147717597
-0.03963801
0.075319795
0.049250173
0.0571593
0.079934388
-0.281325162
-0.093550746
-0.052901168
0.0024086
-0.044232902
-0.083987212
-0.09398822
-0.145825501
-0.056034941
0.00098405
-0.018470178
-0.07507714
0.114683148
-0.091730512
0.041973942
0.097461616
-0.005016011
0.030462998
-0.052987818
0.036078071
0.054911247
0.072393993
-0.075864418
0.126955541
0.095650732
0.09937983
0.008518545
-0.107450138
-0.023142512
-0.059407305
0.142964646
0.051384508
-0.045500063
-0.083527891
0.093860586
0.075733716
-0.020117285
-0.009068584
0.01121764
-0.006911596
-0.034876783
0.14597603
0.116194264
-0.03578671
-0.072953249
-0.023547512
-0.170571729
0.146560844
0.056479898
0.106484901
0.092058625
-0.010967028
-0.054632844
0.006755908
0.111955062
0.064989378
-0.106506155
0.016294185
0.183713481
-0.024137056
-0.051117752
0.018856963
-0.064452259
0.134374764
0.18396994
-0.088683645
-0.130015307
0.081983994
-0.050802349
0.064269011
-0.033315873
-0.001574796
0.037626132
0.18920296
0.156269383
-0.009619443
-0.04237561
0.102472424
0.106924821
-0.006032155
0.151753028
0.000833869
-0.06142867
0.105273095
-0.022369863
-0.063677938
-0.078883036
0.042915372
0.025670207
0.080164757
-0.027273251
-0.075930391
-0.127516523
-0.007411375
0.061427196
-0.114784327
0.032403766
0.030082699
0.003381806
0.042878875
-0.044576749
-0.065173972
-0.004069994
0.178748306
-0.078895589
0.016525587
0.152805689
-0.003300265
0.049639021
0.21813992
0.136724225
0.007038321
0.174459927
0.034403868
-0.065980116
0.003548271
0.085342257
-0.01115809
0.10543034
0.069293202
-0.171863618
-0.196642347
0.015275373
-0.064116663
0.018480661
0.050334555
-0.016520447
0.043229903
-0.023888284
0.095695039
-0.015059979
0.14664454
0.228738763
-0.035623688
0.092347255
0.00488789
-0.038634679
0.083591883
-0.081538553
-0.05912062
-0.151453705
0.043879431
-0.145500956
-0.204900599
0.15557467
-0.002199415
0.000672539
-0.027982191
0.046982707
-0.010564204
-0.045825503
-0.16322609
0.084391503
-0.133451145
-0.043536574
0.068083659
-0.005922909
0.005261888
-0.008969159
-0.030233612
-0.029596282
0.02656701
0.065188108
0.088944576
-0.093591938
0.137553012
-0.161568483
-0.011192209
-0.023953301
0.089703785
-0.033414689
0.093489693
-0.055532268
-0.157945973
-0.060624029
-0.050916936
-0.083414686
-0.011923701
-0.197396515
0.066636259
-0.021293926
-0.003773834
-0.168142233
0.015779026
-0.048627289
-0.008258937
0.009793577
-0.106425376
0.18614122
-0.013117003
0.084748813
-0.035758888
-0.08530577
0.045004394
-0.248243097
0.051959794
-0.096677186
0.120615887
-0.033532053
-0.020955233
0.036585956
0.03526996
0.140846339
0.0097238
0.111236675
-0.063022313
-0.063723796
0.091456958
0.102099423
-0.316416131
0.012690872
0.012889757
0.014763716
0.019875236
0.048406651
-0.002206199
0.058977733
0.093954138
-0.132088562
-0.156197979
-0.098097713
-0.069890344
0.150873319
0.067306005
-0.194052293
0.067890127
-0.122804916
0.04757338
0.121904202
-0.116273748
-0.084229137
-0.027566007
0.102086287
-0.10464371
-0.120505696
0.105980477
0.02031723
0.098669504
-0.10438438
0.091052103
0.032192011
-0.017221848
0.045858755
0.13774629
0.022114376
-0.08588248
0.029324208
-0.080200407
0.023834104
-0.082085543
-0.015542855
0.027771217
-0.061788621
-0.014131641
0.020436468
0.078090725
0.062464433
-0.148332448
-0.146471443
-0.156919819
-0.095333049
-0.064905537
-0.013593738
0.129087596
0.133897168
0.04524004
0.020526327
0.027789256
0.027703157
0.22627026
-0.014550368
-0.087113953
0.007944206
-0.073767222
-0.025260629
-1.63E-05
-0.050929875
-0.040058886
0.134953488
0.017937084
-0.261659702
0.035467859
-0.195926755
0.008814
0.075502154
0.072258288
0.004162379
0.039822154
0.106586874
-0.115938272
-0.026187358
0.111479305
-0.057779167
0.091349399
0.091998639
-0.060468806
-0.043140203
0.078453083
-0.073369953
-0.01386514
-0.050431005
0.077225502
0.219268793
0.15675036
0.03788114
0.02169822
-0.030754652
-0.029760118
0.153926043
0.031445126
-0.100008761
-0.053339935
0
-0.13867432
-0.046654569
0.12554472
-0.131898769
0.045819056
0.037219706
0.037395991
-0.091779961
0.021148019
-0.008281672
-0.037032996
0.136712064
0.010907883
0.006616844
-0.091224025
-0.142172239
0.015142626
-0.004485554
-0.016223527
-0.05742359
0.015865111
-0.092036498
0.193076714
-0.061266439
0.071029275
0.137394087
0.077453358
0.066878242
0.010892583
0.108707766
-0.040115724
-0.138417184
0.118354605
-0.023959631
0.101507771
-0.009649791
0.015584198
0.060992807
0.062451508
0.10378951
-0.011490477
0.132319178
-0.105775063
0.031208589
0.050176077
0.042253172
0.063826963
-0.071135632
0.028887322
0.029381183
-0.159701621
0.02421476
0.11106363
-0.071368256
-0.004843222
-0.005559889
-0.111200172
-0.095893576
-0.155022187
-0.123458638
0.015891604
-0.126856448
-0.1119409
0.101869408
0.039019387
0.242886673
-0.002511312
0.00626222
-0.034514383
0.162367841
0.089349824
0.07746606
0.083037402
0.020877863
-0.084969652
0
0.030907494
-0.024087977
-0.012668281
0.057929591
-0.133869091
-0.006714165
-0.054989787
-0.090682905
-0.033291498
0.139862857
-0.110164341
0.01178293
0.112889086
-0.182184804
0.038964172
-0.015057519
0.034643169
-0.077954997
-0.135613332
0.006378662
0.102746097
-0.008983841
0.100811353
-0.072140228
0.076438132
0.048429575
0.102598025
-0.026872397
-0.010580604
0.009677483
0.125030875
0.00718895
0.074672901
-0.033468946
-0.068736938
0.038715007
0.037365286
-0.124639666
-0.071881783
0.029626838
-0.063356011
-0.007563506
-0.112017425
-0.074154973
-0.077430769
-0.079588697
0.003866021
0.113411947
0.045288788
-0.024424918
0.006787248
0.040750028
-0.05647843
0.028778161
-0.008477214
0.076564611
-0.029072408
-0.051814417
-0.03938022
0.004493398
-0.046846757
-0.082743629
0.139246739
0.043928521
-0.167028444
0.067427173
-0.18035413
0.128164613
-0.144305531
0.028099934
-0.008027089
-0.201037552
-0.017301897
-0.10723444
-0.076192527
-0.058680816
0.046349724
0.042455547
0.003225905
-0.015808554
-0.122415794
0.04553419
0.071605316
0.031647297
-0.030201151
-0.207225258
0.252118604
0.02181019
0.044229818
0.047824533
-0.09817458
0.061464301
0.102163109
0.236251494
0.019768294
-0.087281515
0.072182688
0.072486724
0.044992666
-0.013674944
0.048316429
0.035685801
0.078924565
0.013734732
-0.199207769
-0.06616221
0.034082212
0.106451042
-0.074212457
0.152457409
0.008957868
0.041473212
-0.161734866
-0.061403613
0.093544454
-0.038450851
0.021127385
-0.060148967
0.138867614
0.166762017
0.061646864
-0.044831474
-0.040332644
0.017500461
0.027007751
-0.11871386
-0.015682497
-0.039485152
0.104987246
0.215237167
-0.196686559
-0.007252883
-0.083143646
-0.112849526
-0.067770968
0.071189071
-0.083765465
-0.069777674
0.07027068
0.093017216
0.074670926
0.07694355
0.110468844
0.027573274
0.134892751
-0.083776588
0.234175252
0.131537305
-0.018359956
-0.101439872
0.018585782
-0.004166813
-0.018808195
0.058529558
0.158725687
0.005040866
-0.030140547
-0.083984176
0.042585945
-0.00626169
-0.156084969
-0.011139823
0.070171403
-0.111070245
-0.080985947
-0.040317386
-0.087515448
0.10428292
0.002148558
-0.053250545
-0.050908106
0.015469007
-0.084457298
-0.010570809
-0.0135075
-0.072139018
0.076692793
0.023808327
-0.009421564
-0.106490735
0.001966815
0.149955453
0.003784482
0.168751581
-0.010631615
0.039281792
-0.108912145
-0.204586324
0.094782801
0.018885389
-0.119033435
-0.135799409
-0.173174219
-0.023934329
-0.23532223
0.286922832
0.0199119
-0.116217849
0.239559606
-0.004778438
0.020275453
0.067497431
0.030469275
-0.000242292
0.038064488
0.08790825
0.03802744
-0.076268518
0.184725055
-0.109446346
-0.022024313
0.019184037
-0.014749592
-0.093482775
-0.022910614
-0.141871781
-0.071069546
-0.022191588
-0.057384813
-0.004425016
-0.009770143
0.019012556
0.169515657
-0.041726987
0.076223262
0.047380379
0.087702508
0.032383009
0.046013406
0.073101864
-0.015536121
-0.121588235
-0.034604978
-0.018058369
0.122421869
0.058283865
-0.221832155
-0.023085635
0.005815899
0.020806701
-0.177192598
0.134959719
-0.031947248
-0.089694678
0.141531974
0.057695569
0.138467558
-0.051205769
-0.098702441
0.067412256
-0.139613285
-0.019990907
0.072877415
0.053568748
-0.06715645
0.059497178
-0.08270657
-0.157699677
0.012068291
0.050344484
-0.017016457
-0.004345634
-0.046481539
0.039336138
0.010753673
-0.302625275
-0.001071139
-0.062268829
0.164755636
-0.10202887
0.161940209
0.169207298
0.007916286
-0.013656475
0.151485099
-0.010889502
-0.016523572
0.125637257
0.00092937
-0.049143266
0.097230941
0.077761234
0.056507275
0.060158071
-0.123299811
0.054067149
0.011759647
-0.005782921
0.109020577
-0.165400288
0.009158738
0.147935149
0.006600846
-0.017354308
0.197387038
-0.186924387
-0.080224233
0.12880364
0.054333006
0.046314207
0.034005574
-0.01937741
0.060913258
0.106169256
0.12358593
0.026085475
0.028531306
-0.076408949
-0.062734016
0.075366268
-0.199737429
-0.082614056
-0.033666872
-0.071436319
0.092222967
-0.202029715
-0.004879524
0.047423105
0.107210851
-0.008534982
-0.064599235
-0.041251128
0.068764205
-0.101773475
0.09062151
0.014688413
-0.079544222
0.023221716
0.006385214
-0.028194131
-0.078163262
-0.102760597
0.086532181
0.050549643
0.068384935
-0.054946726
-0.036278088
-0.085614706
-0.112955287
0.011891776
-0.090693966
-0.075881043
0.158480415
0.075547238
-0.01920802
0.089288484
0.013487919
0.068123407
-0.078832371
0.008328474
0.049511383
0.030203418
-0.033296727
-0.004490873
-0.085110696
-0.163525946
0.206523599
-0.003651193
0.032356422
0.195612941
-0.006905357
0.064359077
0.130628745
0.050341425
0.050624924
-0.121685272
-0.310903548
-0.043503043
0.049549528
0.000384
-0.057458386
0.171948174
-0.027340302
-0.023911437
0.136493268
-0.065292435
0.091885309
0.007942926
0.124773222
0.173857911
-0.112801785
-0.038842236
0.029222612
-0.024107029
0.025862043
0.025931643
-0.000706012
0.095300171
0.034390031
-0.190798478
0.000215983
-0.028904559
-0.062123265
-0.153399368
-0.157924881
0.078225716
0.15460974
0.124412574
0.078853516
-0.011200676
0.018196249
-0.148025811
0.151051794
-0.038241277
0.072732304
-0.086835213
0.017044758
0.004193364
0.061630242
0.003948288
-0.127035179
0.038002034
-0.087200726
-0.099097872
-0.130633539
0.11586332
-0.015607302
0.04614645
-0.103507601
0.072777177
-0.050084922
0.036671362
-0.05922381
-0.103885954
-0.112379278
0.127742415
0.034426554
0.025015144
0.009388945
0.114097899
-0.088614857
0.008719066
0.049435549
0.087395951
0.020915866
0.054730353
-0.054969906
0.036068919
0.045082213
-0.028053601
0.000544528
0.136168372
-0.229157997
-0.03321747
0.132271752
-0.016614526
0.012845116
-0.012234176
-0.092768648
-0.021790134
0.080301907
-0.061023235
-0.136188937
-0.128761093
0.230816172
0.190845165
-0.037446208
-0.023911773
-0.155961203
0.072967908
0.047148511
-0.076535472
-0.055636619
0.2030773
-0.107350796
-0.03096097
-0.004306175
0.033922118
-0.097141967
0.058691332
0.094049216
-0.063754935
0.136639097
0.177299643
0.070564572
0.0577818
0.090489103
-0.010349615
-0.132284186
0.104874117
0.199468348
0.171099897
-0.078129531
0.057856777
-0.024046577
-0.105427095
-0.00549642
0.071924252
0.068669329
-0.025754541
0.040948056
0.097513743
0.156824948
-0.155811505
-0.011058512
-0.12737174
-0.115980399
0.151810576
-0.007203942
0.01352943
0.066958199
-0.043396897
0.022457379
0.161655693
0.115133673
0.135070843
0.179657365
0.026602571
0.071048387
0.055247723
0.03936464
-0.230578802
-0.146310728
0.131857444
-0.079553186
0.053663644
-0.025952523
0.004753653
-0.017721371
-0.049104893
-0.01564832
-0.095551285
-0.067474185
-0.04200191
0.024134378
0.105830965
0.016197191
0.092459149
0.101618129
-0.057305109
-0.007508706
-0.032691634
0.102838444
0.003273897
-0.050560884
0.033271873
0.091172979
-0.113161676
-0.024910434
0.010155258
-0.029346557
-0.05566816
-0.074747691
0.091723405
0.006599251
0.021994877
0.027169779
-0.018195939
0.066357767
-0.041773075
0.191571459
-0.051490847
-0.004753514
0.016515831
-0.032354615
-0.056369198
-0.009700958
-0.027171176
-0.091585448
0.005988363
-0.104024876
-0.060399409
0.083744301
0.04496257
-0.116966475
0.063146395
-0.063475579
-0.103798781
-0.056129993
-0.068317352
-0.033015742
0.14847936
-0.073073357
-0.104302179
0.004068675
-0.042357946
0.03046876
-0.072684195
0.10428948
0.063583652
0.074694153
-0.153313411
0.039998313
0.115275044
0.021600715
0.108507525
0.131557589
0.039714732
0.126978438
0.048296451
-0.113636178
-0.089526171
-0.068994166
0.02459421
-0.184840723
0.06269499
0.035584
-0.035860723
0.054897486
-0.016625191
-0.007225874
-0.067193068
-0.174588781
0.00982303
0.22302975
-0.007344595
0.010957735
-0.143528785
0.312942417
-0.191540286
-0.029154223
0.069766751
0.065199227
-0.010502306
0.059724894
-0.081052123
0.081396995
0.067249503
0.12983373
0.099129611
-0.07544659
-0.047515912
0.12389181
-0.025683545
-0.030024275
0.063815295
-0.084910248
0.079555748
0.028183919
-0.055711532
-0.058142232
0.183328309
0.017256404
-0.143979927
0.017379596
-0.020385458
-0.059215633
0.030179614
-0.104112234
0.024053602
-0.096646245
-0.10595031
0.049069517
-0.020722161
-0.04910724
0.124022071
0.053630718
-0.020429061
-0.031707381
-0.082441819
-0.01498841
0.10863453
-0.01965289
-0.011300777
[truncated: 2,096 more rows]
